1 **The *In Vivo* Source of Type I and Type III IFNs is Pathogen Dependent**

2 Marvin J. Sandoval<sup>1,4</sup>, Hsiang-Chi Tseng<sup>2</sup>, Heidi P. Risman<sup>2</sup>, Sergey Smirnov<sup>3</sup> Qing Li<sup>3</sup>,  
3 Jian-Da Lin<sup>3,5</sup>, Amariliz Rivera<sup>6</sup>, Russell K. Durbin<sup>2</sup>, Sergei V. Kotenko<sup>3</sup> and Joan E.  
4 Durbin<sup>2\*</sup>,

5

6 <sup>1</sup>. Immunology and Inflammation Graduate Program, New York University School of  
7 Medicine, 550 1<sup>st</sup> Ave., New York, NY, USA.

8 <sup>2</sup>. Department of Pathology, Immunology and Laboratory Medicine, Rutgers – New  
9 Jersey Medical School, 185 South Orange Ave., Newark, NJ, USA

10 <sup>3</sup>. Department of Microbiology, Biochemistry and Molecular Genetics, Rutgers – New  
11 Jersey Medical School, 205 S. Orange Ave., Newark, NJ, USA

12 <sup>4</sup>. Current Address: Autoimmunity and Inflammation Program, Hospital for Special  
13 Surgery, New York, NY 10021

14 <sup>5</sup>Current Address: Department of Biochemical Science and Technology, College of Life  
15 Science, National Taiwan University, Taipei City, Taiwan.

16 <sup>6</sup>. Department of Pediatrics, Rutgers – New Jersey Medical School, 205 S. Orange Ave.,  
17 Newark, NJ, USA

18 \* Corresponding author

19

20 [durbinje@njms.rutgers.edu](mailto:durbinje@njms.rutgers.edu) (JED)

21

## 22 **Abstract**

23 Type I ( $-\alpha$ ,  $\beta$ ) and type III ( $-\lambda$ ) interferons (IFNs) are produced in response to virus  
24 infection and upregulate a largely overlapping set of IFN stimulated genes which  
25 mediate the protective effects of these antiviral cytokines. *In vitro* studies have  
26 demonstrated the redundancy of these two cytokine families which activate the same  
27 transcription factor, IFN stimulated gene factor 3 (ISGF3), via distinct ligands and  
28 receptors. However, *in vivo*, these IFN types do have distinct functions based on  
29 receptor distribution, but also ligand availability. Using a newly generated IFN- $\lambda$  reporter  
30 mouse strain we have observed that both type I and type III IFNs are produced in  
31 response to respiratory tract infection by Newcastle disease virus (NDV) and influenza  
32 A virus (IAV). In the case of NDV these IFNs are synthesized by different cell types.  
33 Type I IFNs are produced primarily by alveolar macrophages, type III IFNs are made  
34 only by epithelial cells, and production of either is dependent on MAVS. While epithelial  
35 cells of the respiratory tract represent the primary target of IAV infection, we found that  
36 they did not significantly contribute to IFN- $\lambda$  production, and IFN- $\lambda$  protein levels were  
37 largely unaffected in the absence of MAVS. Instead we found that pDCs, a cell type  
38 known for robust IFN- $\alpha$  production via TLR/MyD88 signaling, were the major producers  
39 of IFN- $\lambda$  during IAV infection, with pDC depletion during influenza infection resulting in  
40 significantly reduced levels of both IFN- $\alpha$  and IFN- $\lambda$ . In addition, we were able to  
41 demonstrate that pDCs rely on type I IFN for optimal IFN- $\lambda$  production. These studies  
42 therefore demonstrate that the *in vivo* producers of Type III IFNs in response to  
43 respiratory virus infection are pathogen dependent, a finding which may explain the  
44 varying levels of cytokine production induced by different viral pathogens.

## 45 Introduction

46 The antiviral activity of the type I interferons (IFN- $\alpha/\beta$ ) has been appreciated since their  
47 discovery in 1957 [1, 2]. The more recent discovery of type III IFNs (IFN- $\lambda$ ) [3] [4], a new  
48 IFN family with its own distinct receptor but mediating the same antiviral response, has  
49 led to a reevaluation of our understanding of innate immune responses. The IFN- $\lambda$   
50 receptor, comprised of the IFN-lambda receptor (IFNLR) chain and the IL-10R2 chain, is  
51 expressed on most epithelial cells, but not ubiquitously found on all cell types like the  
52 IFN-alpha receptors (IFNAR) 1 and 2. The type III IFNs act to protect mucosal surfaces,  
53 the point of entry for many viral pathogens, but their source(s), and the stimuli leading to  
54 their production are not yet well characterized [7, 8]. To better understand the relative  
55 contributions of type I and type III IFNs to antiviral protection, we generated an IFN- $\lambda$   
56 reporter mouse, *Ifnl2<sup>gfp/gfp</sup>*, and used this strain to examine the relative contribution of  
57 various cell types to the production of these cytokines. This approach was inspired by  
58 the work of Kumagai *et al.* [5] who demonstrated that alveolar macrophages produce  
59 the bulk of IFN- $\alpha$  following pulmonary infection with Newcastle disease virus (NDV)  
60 using mice expressing GFP under the control of the *Ifna6* promoter. Similar results  
61 were obtained following infection of these *Ifna6<sup>gfp/+</sup>* mice with respiratory syncytial virus  
62 (RSV) [6].

63

64 Multiple studies have demonstrated that type I and type III IFNs are induced *in vitro* by  
65 the same stimuli, e.g. virus infection and TLR ligand exposure [7] [8], but it is not yet  
66 known if induction consistently follows the same pathways following virus infection *in*  
67 *vivo*. Making use of *Ifnl2<sup>gfp/gfp</sup>* mice we have confirmed Kumagai's observation that

68 alveolar macrophages are the major source of IFN- $\alpha$  during NDV infection, but also  
69 observed that this cell type produces no IFN- $\lambda$ . IFN- $\lambda$  in this infection is entirely derived  
70 from respiratory epithelial cells in a MAVS-dependent manner. The finding that IFN- $\lambda$  is  
71 preferentially produced by polarized epithelial cells *in vitro* [9] has also been observed in  
72 mouse models [10]. These published results support the notion that, despite their  
73 activation of the same antiviral pathway, IFN- $\alpha/\beta$  and IFN- $\lambda$  are produced by different  
74 cell types in response to the same stimulus.

75

76 In this study we used the *Ifnl2<sup>gfp/gfp</sup>* reporter mice to test the generality of this hypothesis  
77 with a number of viruses. In both the NDV and rhesus rotavirus (RRV) infections we  
78 observed IFN- $\lambda$  production by the IFN- $\lambda$  responsive cells lining the target tissue,  
79 emphasizing the important role for this cytokine in protection of the epithelial barrier.  
80 This pattern of IFN expression was not recapitulated in the murine model of influenza A  
81 virus (IAV) infection, where a significant proportion of IFN- $\lambda$  induced by infection was  
82 produced by pDCs in a MAVS-independent manner. Taken together our studies show  
83 that the source of type I and type III IFNs *in vivo* is pathogen dependent, and not  
84 defined by the route of infection or the tropism of the infecting virus.

85

## 86 **Results**

### 87 **Generation and Characterization of the IFN- $\lambda$ reporter mouse**

88 To identify IFN- $\lambda$ -producing cell populations *in vivo*, we generated an IFN- $\lambda$  reporter  
89 mouse by replacing the coding region of *ifn12* with an *eGFP-Neo* cassette through  
90 homologous recombination, while maintaining the *ifn12* promoter and UTR regions intact  
91 (Fig 1A). The FRT sites flanking the neo gene allowed its removal by crossing mice  
92 carrying the targeted allele with mice expressing the FLP-recombinase to generate  
93 animals lacking the Neo gene while simultaneously carrying the GFP-targeted allele. Mice  
94 heterozygous for the eGFP-targeted allele were crossed to generate mice homozygous  
95 for the targeted allele. Homozygous *ifn12*<sup>eGFP/eGFP</sup> knockin mice can no longer produce  
96 IFN- $\lambda$ 2, but still retain functional *ifn13* gene loci. Genotypes were determined by  
97 conventional PCR using primers targeting the IFN- $\lambda$  locus and the eGFP transgene (Fig  
98 1A, B).

99 Human pDCs secrete high levels of both type I and type III IFNs when stimulated by  
100 TLR ligands or virus infection [11], so characterization of the reporter strain was initiated  
101 by Newcastle disease virus (NDV) infection of Flt3-ligand (FLT3L) cultured bone marrow  
102 derived dendritic cells. NDV is an avian paramyxovirus known to induce high levels of  
103 type I IFNs in many cell types including murine pDCs [5, 12], so we used this system to  
104 ask whether GFP expression correlated with IFN- $\lambda$  production upon induction by virus  
105 infection.

106 GFP expression following virus inoculation was detected by fluorescence microscopy  
107 (Fig 1C), as well as flow cytometry (Fig 1D). A Fluorescence Activated Cell Sorter (FACS)  
108 was used to separate NDV-treated, FLT3L-cultured DCs into GFP- and GFP+ populations

109 for RNA extraction and subsequent qRT-PCR analysis of IFN- $\lambda$ 3 and eGFP transcripts  
110 (Fig 1D). This analysis confirmed that IFN- $\lambda$ 3 and eGFP transcripts were enriched only  
111 in GFP+ cells, demonstrating that GFP fluorescence from reporter cells reflected IFN- $\lambda$   
112 production.

113 We also explored GFP induction following virus infection of epithelial cells. Primary  
114 kidney epithelial cells derived from *ifnl2<sup>gfp/gfp</sup>* reporter mice were cultured *in vitro* and  
115 infected with NDV, respiratory syncytial virus (RSV), rhesus rotavirus (RRV) or influenza  
116 A virus (Fig 1E). At 24 hours post-infection, all infected cultures contained GFP+ cells,  
117 but for all viruses the percentage of GFP+ cells was relatively small, even at higher MOIs.  
118 A similar effect was observed in FLT3L cultured DCs (data not shown), suggesting that  
119 during a virus infection, not all cells capable of producing IFN- $\lambda$  go on to do so as has  
120 been found for IFN- $\alpha$  [13].

121

### 122 **A small population of CD8 $\alpha$ DCs produce IFN- $\lambda$ in response to poly I:C treatment *in*** 123 ***vivo***

124 Production of IFN- $\lambda$  by different cell types has been detected in response to a wide  
125 variety of stimuli or pathogens *in vitro* [14-16]. Taken together, these publications  
126 demonstrate that many cell types have the capacity to produce type III IFNs under the  
127 appropriate conditions. However, reports investigating the cellular sources of IFN- $\lambda$  in a  
128 whole animal in response to TLR ligands or virus infections are few. One such study  
129 identified splenic CD8 $\alpha$ + dendritic cells as the main producers of IFN- $\lambda$  in mice that were  
130 treated intravenously (i.v.) with the TLR3 agonist, poly I:C [17]. We carried out a similar  
131 experiment using our IFN- $\lambda$  reporter mouse model to determine whether we could confirm

132 that result by following GFP expression. Cohorts of *Ifnl2<sup>gfp/gfp</sup>* reporter mice were injected  
133 i.v. with 100 µg of poly I:C or PBS, and their splenocytes harvested six hours later. Using  
134 antibodies to the cell surface markers CD11b, CD11c, CD8α, B220, and Siglec H, we  
135 identified pDC, CD8α DC, and cDC subsets, and found, as expected, that GFP  
136 expression was mainly confined to the CD8α DC populations (Fig 2). Interestingly, IFN-  
137 λ-producing (GFP+) CD8α DCs made up only 6% of the entire CD8α DC population; GFP  
138 expression by pDCs and cDCs was minimal. This result is consistent with the observation  
139 of Lauterbach *et al.* [17] that CD8α DCs are by the far the most significant contributor to  
140 IFN-λ production in response to poly I:C, supporting the use of the *Ifnl2<sup>gfp/gfp</sup>* mouse strain  
141 to determine the source of IFN-λ *in vivo*. No upregulation of GFP was found in animals  
142 receiving PBS.

143

#### 144 **Intestinal epithelial cells produce IFN-λ in response to rotavirus infection *in vivo***

145 As both type I and type III IFNs are produced in response to many different virus  
146 infections *in vivo* [14] [7], we wished to investigate the cellular sources of type III IFNs  
147 during virus infection of mucosal surfaces such as the gastrointestinal tract and the  
148 respiratory tract. Rotavirus is a double-stranded RNA virus that primarily infects intestinal  
149 epithelial cells and is one of the leading causes of severe diarrhea in young children in  
150 the developing world [18]. Several studies have shown the importance of IFN-λ responses,  
151 along with type I IFNs, in controlling rotavirus replication [19, 20]. Here, we explored the  
152 *in vivo* source of IFN-λ during rhesus rotavirus (RRV) infection of suckling mice. The  
153 kinetics of IFN induction by RRV was first determined using Mx2-Luciferase mice, a  
154 reporter mouse strain that allows visualization and quantification of IFN responses by

155 measuring luciferase activity driven by the promoter of the interferon-stimulated gene Mx2  
156 [21]. By this approach, a robust interferon response was detected as early as 12 hours  
157 post-infection, peaking at 24 hours, and subsiding after 48 hours (Fig 3A&B). Consistent  
158 with this observation, IFN- $\lambda$  protein was detected in the small intestine of rotavirus-  
159 infected WT 129SvEv mice 24 hours post-infection by ELISA (Fig 3C). To determine the  
160 source of IFN- $\lambda$  induced by RRV, intestines were harvested from infected IFN- $\lambda$  reporter  
161 mice 24 hours post-inoculation and analyzed by immunohistochemistry. Formalin-fixed,  
162 paraffin-embedded tissue sections from mock-infected or RRV-infected IFN- $\lambda$  reporter  
163 mice were stained with antibodies against GFP and RRV antigens (Fig 3E). GFP+ cells  
164 were present only in tissues harvested from RRV-infected IFN- $\lambda$  reporter mice, and  
165 absent from the intestines of mock-infected IFN- $\lambda$  reporter mice, or RRV-infected WT  
166 129SvEv animals. GFP expression in RRV-infected IFN- $\lambda$  reporter mice was found  
167 exclusively in the intestinal epithelial cells. RRV-infected epithelial cells were found in  
168 both RRV-infected IFN- $\lambda$  reporter mice and RRV-infected WT controls, confirming  
169 successful infection of these animals. These results support the hypothesis that epithelial  
170 cells are the primary source of IFN- $\lambda$  during RRV infection. As IFN- $\lambda$  reporter mice lack  
171 the *ifn12* locus but have an intact *ifn13* locus, we compared RRV titers from the small  
172 intestine of IFN- $\lambda$  reporter and WT 129SvEv animals, and found no difference in the  
173 amount of virus detected (Fig 3D). Thus the reporter mice are phenotypically normal,  
174 without enhanced susceptibility to virus infection or elevated virus loads.

175

176

177



178 **Airway epithelial cells produce IFN- $\lambda$  in response to NDV infection *in vivo***

179 Next, we sought to investigate IFN- $\lambda$  production during virus infection of the respiratory  
180 tract, another mucosal compartment that serves as a major portal for virus entry. Our lab  
181 and others have reported that both type I and type III IFNs are produced in response to  
182 respiratory virus infections [22, 23]. In the lung, as in the intestine, both IFN types appear  
183 to be important for antiviral protection of the respiratory tract, as mice deficient in both  
184 type I and type III IFN receptors demonstrate significantly elevated viral burdens upon  
185 virus challenge [24, 25]. To determine whether the airway lining cells are major IFN- $\lambda$   
186 producers during respiratory virus infection *in vivo*, we inoculated IFN- $\lambda$  reporter mice with  
187 Newcastle disease virus (NDV), a virus known to induce high levels of type I IFNs in  
188 mammals [26, 27]. At 24 hours post-infection, lungs from mock-infected or NDV-infected  
189 mice were harvested and processed to generate single cell suspensions. IFN- $\lambda$ -producing,  
190 epithelial cell adhesion molecule (EpCAM)+ epithelial cells were assayed for GFP  
191 expression by flow cytometry. Only epithelial cells from NDV-infected reporter mice were  
192 GFP+ (Fig 4A), with approximately 15% of lung epithelial cells in the IFN- $\lambda$  reporter mice  
193 expressing IFN- $\lambda$  in response to infection *in vivo* (Fig. 4B). ELISA measurements of IFN-  
194  $\lambda$  protein present in bronchoalveolar lavage samples (BALs) from these same animals  
195 also demonstrated robust IFN- $\lambda$  secretion in response to NDV infection, with > 10 ng/ml  
196 of IFN- $\lambda$  protein detected (Fig 4C).

197 As with our rotavirus studies, we looked for GFP+ cells in tissue sections prepared from  
198 IFN- $\lambda$  reporter mice that were mock or NDV-infected. As before, lung tissue sections were  
199 stained using antibodies against GFP and viral antigens (Fig 4D). This histological  
200 analysis confirmed our flow cytometry results, showing that GFP expression was limited

201 to the columnar epithelial cells that line the bronchi and bronchioles of the lung. The same  
202 cell type expressed both NDV and GFP protein in infected lungs. Interestingly, while rare  
203 cells stained with antibodies to both GFP and NDV proteins, most cells in the infected  
204 airway showed either GFP or NDV staining. To be certain that elimination of IFN- $\lambda$ 2 in our  
205 reporter mouse was not skewing our results, we compared total IFN- $\alpha$  and IFN- $\lambda$   
206 production in BAL samples from NDV-infected WT and reporter mice and saw no  
207 significant difference between the strains (Fig 5).

208

### 209 **Immune cells are not a significant source of IFN- $\lambda$ during NDV infection *in vivo***

210 IFN- $\lambda$  synthesis by dendritic cells and monocytes exposed to viruses and pattern  
211 recognition receptor (PRR) agonists *in vitro* has been reported [7, 8, 11, 28]. So while  
212 results from our flow cytometry and histology studies using the IFN- $\lambda$  reporter mice clearly  
213 demonstrated GFP expression from bronchial epithelial cells during NDV infection *in vivo*,  
214 we wished to determine whether there was also a contribution from innate immune cells  
215 in this model. To do this we used a panel of antibodies targeting cell surface markers to  
216 assess IFN- $\lambda$  production, or GFP expression, by neutrophils (CD45<sup>+</sup> F4/80<sup>-</sup> Ly6G<sup>+</sup>),  
217 eosinophils (CD45<sup>+</sup> F4/80<sup>+</sup> SiglecF<sup>+</sup> CD11c<sup>-</sup>), monocyte-derived macrophages (CD45<sup>+</sup>  
218 F4/80<sup>+</sup> SiglecF<sup>-</sup> CD11c<sup>+</sup>) and alveolar macrophages (CD45<sup>+</sup> F4/80<sup>+</sup> Siglec F<sup>+</sup> CD11c<sup>+</sup>)  
219 purified from the lungs of NDV-infected IFN- $\lambda$  reporter mice 24 hours post-infection. GFP  
220 expression was minimal in all of these cell types (Fig 6), and therefore it is unlikely that  
221 they are contributing significantly to IFN- $\lambda$  production in this setting.

222 We were particularly intrigued by the lack of GFP expression in alveolar macrophages  
223 from NDV-infected IFN- $\lambda$  reporter mice. Previously published reports using an IFN- $\alpha$

224 reporter mouse have identified alveolar macrophages as the major IFN- $\alpha$ -producing cell  
225 population during NDV and RSV infections *in vivo* [5, 6]. The results of our experiment  
226 demonstrate that alveolar macrophages do not contribute to IFN- $\lambda$  production stimulated  
227 by NDV infection *in vivo*, suggesting that alveolar macrophages preferentially upregulate  
228 type I IFNs. To confirm this observation we carried out NDV infections in WT 129 SvEv  
229 mice and looked for induced IFN- $\lambda$  expression in both epithelial cells and alveolar  
230 macrophages. Lungs from mock- or NDV-infected mice were harvested 24 hrs post-  
231 infection, and epithelial cells (CD45<sup>-</sup> EpCAM<sup>+</sup>) and alveolar macrophages (CD45<sup>+</sup>  
232 F4/80<sup>+</sup> SiglecF<sup>+</sup> CD11c<sup>+</sup>) were sort purified by FACS. RNA from the sorted cell  
233 populations was used to synthesize cDNA for qPCR analysis which showed that IFN- $\lambda$   
234 transcripts were present only in the epithelial cell fraction isolated from NDV-infected mice  
235 (Fig 7). IFN- $\lambda$  transcripts were not detected in the alveolar macrophage fraction from  
236 either mock-infected or NDV-infected mice, further confirming the readout from the IFN- $\lambda$   
237 reporter mouse strain. As an alternative approach to assessing IFN- $\lambda$  production induced  
238 by virus, we used *in situ* hybridization to detect IFN- $\lambda$  mRNA in lung sections from infected  
239 animals (Fig 8). IFN- $\lambda$  RNA was found in bronchial epithelial cells of NDV-infected mice  
240 and not mock-infected animals. Taken together, the results from our qRT-PCR and *in situ*  
241 hybridization studies lead to the conclusion that only epithelial cells, and not alveolar  
242 macrophages, are responsible for IFN- $\lambda$  production during NDV infection.

243 To ensure that our study produced results consistent with the work of Kumagai *et al.*  
244 [5], we also assayed RNA purified from the sorted epithelial cell and alveolar macrophage  
245 populations (Fig 8A) for the presence of IFN- $\alpha$  transcripts. As expected, induction of IFN-  
246  $\alpha$  mRNAs were observed only in alveolar macrophages (Fig 8C&D).

247

## 248 **IFN production by alveolar macrophages *ex vivo***

249 Noting the inability of the alveolar macrophage population to synthesize type III IFNs  
250 in the course of NDV infection, we wished to determine whether these cells were  
251 intrinsically unable to produce IFN- $\lambda$  in response to NDV, or whether extrinsic factors in  
252 the lung microenvironment were restricting their production of IFN- $\lambda$ . To ask this question,  
253 alveolar macrophages were purified from the lungs of naïve 129 SvEv mice by  
254 collagenase digestion and FACS sorting (Fig 9A) then mock-infected, or infected with  
255 NDV at an MOI=10, for 24 hours. The cells were then collected for RNA extraction and  
256 assayed by qPCR for the presence of IFN- $\lambda$  transcripts. RNA isolated from a rodent cell  
257 line constitutively expressing FLAG-tagged mIFN- $\lambda$ 2, was used as a positive control. This  
258 analysis failed to detect IFN- $\lambda$  expression from either mock-infected or NDV-infected  
259 alveolar macrophages (Fig 9B), a result confirmed by ELISA assay of media from the  
260 infected alveolar macrophage cultures (Fig 9C). Assay of the same samples showed high  
261 levels of IFN- $\alpha$  in media harvested from NDV-infected alveolar macrophages (Fig 9C).  
262 These results demonstrate that the same stimulus results in the production of either type  
263 I or type III IFN in a cell-type specific manner.

264

## 265 **Plasmacytoid dendritic cells, and not epithelial cells, are the major producers of** 266 **IFN- $\lambda$ during influenza A virus (IAV) infections *in vivo***

267 Intranasal administration of the non-replicating NDV allowed us to examine type I and  
268 type III IFN production following initial exposure, without regard to virus spread. However  
269 we also wished to use the *Ifn12<sup>gfp/gfp</sup>* reporter mouse strain to characterize IFN- $\lambda$  induction

270 by influenza A virus (IAV), a virus capable of robust replication and spread in this species.  
271 Published studies have reported co-production of type I and type III IFNs from both pDCs  
272 [11] and epithelial cells [23, 29] exposed to IAV *ex vivo*, and we wished to characterize  
273 the *in vivo* source(s) of these cytokines. Lung homogenates from *Ifnl2<sup>gfp/gfp</sup>* mice infected  
274 with the WSN strain of IAV (10<sup>6</sup> pfu) were prepared 48 hours post infection, and assayed  
275 by flow cytometry for GFP expression. By this method, measurable GFP expression was  
276 detected only in the pDC subset (CD45+/CD11c+/CD11b-/B220+/PDCA1+) and not in  
277 epithelial cells (Fig 10A-C).

278 Given the data obtained with NDV, and a recent study which concluded that epithelial  
279 cells are the primary source of IFN-λ in IAV infection [30], we considered the possibility  
280 that the more numerous epithelial cells might produce lower levels of IFN-λ on a per cell  
281 basis, below the level of detection by GFP expression, but still contribute to overall  
282 production of this cytokine. We approached this question in two ways. Using the sorting  
283 strategy shown in Figure 10 B & C, epithelial cells and pDCs from lungs of IAV-infected  
284 WT mice and controls were obtained, and RNA harvested from these populations was  
285 assayed by qRT-PCR for the presence of *Ifnl2/3* transcripts. As shown in Figure 10D,  
286 while IFN-λ2/3 mRNA could be detected in EpCAM+ cells from infected animals, pDCs  
287 appeared to be the predominant source of both IFN-α and IFN-λ. This result was  
288 consistent with ISH hybridization studies using formalin-fixed lung tissues from IAV-  
289 infected WT and reporter mice. Immunofluorescence studies showed diffuse positive  
290 staining for influenza antigen in airway lining epithelium, and oligonucleotide probes did  
291 detect rare IFN-λ2/3 expressing epithelial cells (Fig 10E) in animals infected with the WSN  
292 strain of IAV. A similar GFP expression pattern in pDCs and epithelial cells was observed

293 by flow cytometry in animals infected with the PR8 strain, in the presence or absence of  
294 the NS1 gene (Fig 11) 48 hrs post-infection, but we were not able to detect *ifnl* transcripts  
295 by ISH in PR8-infected epithelial cells (data not shown).

296 To determine the relative contribution of these sources, we generated marrow chimeras  
297 using bone marrow harvested from newly generated IFN- $\lambda$  ligand deficient mice, *ifnl*<sup>-/-</sup>,  
298 lacking both the *ifnl2* and *ifnl3* alleles (See Supplemental Fig. 2). Lethally irradiated WT  
299 mice were reconstituted with bone marrow harvested from either WT or *ifnl*<sup>-/-</sup> animals.  
300 Chimeric mice were then challenged with IAV, 10<sup>5</sup> pfu of WSN, and BALs collected 48  
301 hours post infection were assayed for the presence of IFN- $\lambda$  by ELISA. IAV-infected mice  
302 reconstituted with *ifnl*<sup>-/-</sup> bone marrow showed significantly reduced levels of IFN- $\lambda$  protein  
303 compared with IAV-infected animals which received WT bone marrow (Fig 12)  
304 demonstrating that ~ 30%, of IFN- $\lambda$  produced in response to IAV is derived from the  
305 epithelial compartment. To further pinpoint the source of this cytokine, WT mice were  
306 depleted of pDCs prior to IAV infection with anti-PDCA1 antibody, or a Rat IgG Isotype  
307 control (Fig 13A). Post infection measurements of BAL IFN- $\lambda$  show a significant decrease  
308 in IFN- $\lambda$  production in the absence of pDCs at 24 hrs post-infection, ~ 60% (Fig 13B),  
309 consistent with the data obtained by generation of bone marrow chimeras.

310

311

## 312 **Pathway activation by virus**

313 As IFN- $\lambda$  induction by NDV occurred only in CD45<sup>-</sup> EpCAM<sup>+</sup> cells, and IFN- $\alpha$  induction  
314 only in alveolar macrophages in NDV infection, we hypothesized that production of either  
315 cytokine would depend on cytoplasmic PRRs. Many single stranded RNA viruses,

316 including NDV and influenza [31], have been found to activate retinoic acid inducible  
317 gene-I (RIG-I). RIG-I bound to viral RNA interacts with the adaptor protein called  
318 mitochondrial antiviral-signaling protein (MAVS), triggering the events leading to IFN  
319 synthesis. To determine the role of MAVS activation in the production of each IFN type,  
320 we made use of MAVS<sup>-/-</sup> mice, available on the C57BL/6 background. WT and MAVS  
321 deficient animals were inoculated with NDV, and both IFN- $\alpha$  and IFN- $\lambda$  levels were  
322 determined by ELISA of BALs collected 24 hours post-infection. As expected, there was  
323 no induction of either cytokine in the absence of MAVS, demonstrating that the events  
324 triggered by NDV recognition are dependent on cytoplasmic pattern recognition pathways  
325 in both cell types (Fig 14).

326

327 Since our studies of IFN- $\lambda$  induction by IAV suggested that pDCs are the predominant  
328 type III IFN producing cell population *in vivo*, we wished to determine which signaling  
329 pathways were triggered by this infection. Several reports have previously shown that  
330 pDC recognition of the influenza genomic ssRNA by the TLR7 endosomal pathway that  
331 signals through the protein myeloid differentiation primary response 88 protein (MyD88)  
332 [32-34] results in robust type I IFN expression. Based on our finding that pDCs are also  
333 the major source of type III IFNs in response to IAV infection, we suspected that this  
334 pathway was also required for optimal IFN- $\lambda$  production. To test this assumption, MAVS-  
335 <sup>-/-</sup> mice on the C57BL6 background were infected with the WSN and PR8 strains of IAV,  
336 and IFN- $\lambda$  protein levels were measured in BALs. We saw no reduction in IFN- $\lambda$   
337 expression following PR8 infection of MAVS<sup>-/-</sup> mice at 24, 48 and 72 hours post infection  
338 (Fig 15A), but a ~ 40% reduction following WSN infection at 48 hours post infection,

339 consistent with data from our pDC depletion study. Conversely, in the absence of MyD88  
340 (Fig 15B), a more significant reduction in IFN- $\lambda$  was seen in the BALs of WSN-infected  
341 mice. Taken together, our data show that while both pathways can contribute to IFN- $\lambda$   
342 production following IAV infection, the major contribution is pDC derived, particularly for  
343 the PR8 strain of IAV.

344

345 We further explored this IAV strain dependence *ex vivo* using WT murine tracheal  
346 epithelial cells (mTEC) cultured at an air-liquid interface on transwell filters. IFN- $\lambda$  protein  
347 levels in culture supernatants from virus infected mTECs showed robust production by  
348 NDV or WSN infected cultures, but no detectable IFN- $\lambda$  following PR8 infection (Fig 16).  
349 This result is consistent with our inability to detect epithelial IFN- $\lambda$  production following  
350 PR8 infection *in vivo*, and the absence of a requirement for functional MAVS protein.

351

### 352 **Plasmacytoid DC production of IFN- $\lambda$ requires type I IFN signaling**

353 We and others have observed no significant difference in the resistance of wild type  
354 and IFNAR<sup>-/-</sup> mice to IAV infection [22, 35]. In the absence of the type I IFN pathway,  
355 IFN- $\lambda$  production is sufficient to inhibit virus replication and spread. Assuming that pDCs  
356 were a major source of this cytokine, GFP expression was assayed in pDCs isolated from  
357 the lungs of PR8-infected *Ifnl2<sup>gfp/gfp</sup>* mice on WT or IFNAR<sup>-/-</sup> 129SvEv strain backgrounds.  
358 In this experiment, pDCs from IAV-infected *Ifnl2<sup>gfp/gfp</sup>* reporter mice with intact type I IFN  
359 signaling expressed GFP, but strongly reduced expression was detected in pDCs from  
360 IFNAR deficient *Ifnl2<sup>gfp/gfp</sup>* animals (Fig 17A). *In vitro* WSN infection of FLT3L cultured  
361 pDCs derived from bone marrow of wild type or IFNAR<sup>-/-</sup> mice produced the same result,



362 with ELISA-detectable amounts of IFN- $\lambda$  protein found only in medium from IAV-infected  
363 IFNAR<sup>+/+</sup> pDC cultures.

364 Plasmacytoid DCs are unique for their constitutive expression of interferon regulatory  
365 factor 7 (IRF7), a transcription factor essential for the induction of IFN- $\alpha$  genes [36]. IRF7  
366 has also been implicated as a driver for IFN- $\lambda$  transcriptional activation [37] [38]. Given  
367 the importance of IRF7 in the induction of IFN genes, we looked to see whether IRF7  
368 levels were altered in the absence of IFNAR. As shown in Figure 17C, qPCR analysis  
369 demonstrated a substantial reduction in basal levels of IRF7 mRNA in IFNAR<sup>-/-</sup> pDCs.  
370 Since IRF7 is itself an ISG, we conclude that pDCs require some level of tonic activation  
371 of the type I IFN signaling pathway to maintain sufficient IRF7 for type III IFN induction in  
372 response to IAV infection. Interestingly, there was no decrease in GFP<sup>+</sup> epithelial cells in  
373 NDV-infected IFNAR<sup>-/-</sup> IFN- $\lambda$  reporter mice (Fig 18), supporting our conclusion that type  
374 I IFN-dependent maintenance of IRF7 levels in pDCs is essential for optimal type III IFN  
375 induction by IAV.

376

## 377 **Discussion**

378 Since the discovery of type III IFNs in 2003 [3] [4] and the demonstration that identical  
379 sets of ISGs are induced by type I and type III IFNs in sensitive cells [39, 40], many groups  
380 have sought to determine whether these cytokines play a unique role in antiviral immunity.  
381 It has been found that type I and type III IFN receptors are differentially expressed by  
382 different cell types. While most immune cells in mouse and man are IFN- $\alpha$  responsive,  
383 only human pDCs, neutrophils and B cells have been found to consistently respond to  
384 IFN- $\lambda$  [11, 30, 41, 42]. Until recently it was thought that all epithelial cells respond to both

385 IFN- $\alpha/\beta$  and IFN- $\lambda$ , but recent *in vivo* studies have demonstrated that intestinal epithelial  
386 cells become IFN- $\alpha$  insensitive soon after birth, and respond only to IFN- $\lambda$  *in situ* [19].  
387 These observations point to distinct roles for type I and type III IFNs in innate immune  
388 responses, determined primarily by the responsiveness and sensitivity of specific cell  
389 types to IFN- $\alpha/\beta$  and IFN- $\lambda$ , but also by the availability of their ligands.

390 Our goal in generating an IFN- $\lambda$  reporter mouse was to investigate the source of this  
391 cytokine as a viral infection of an epithelial surface progressed. This was done by  
392 replacing the *IFNL2* coding sequence with *eGFP*, a reporter gene whose expression is  
393 then regulated by the *IFNL2* promoter, UTR regions and other elements surrounding the  
394 *IFNL2* gene. Our first aim was to determine the extent to which GFP expression correlated  
395 with IFN- $\lambda$  production by various cell types. *In vitro* virus infection of both epithelial and  
396 dendritic cells derived from the reporter mice induced GFP expression, and only GFP+  
397 cells were found to express IFN- $\lambda$  transcripts. Equally important were studies to confirm  
398 GFP and IFN- $\lambda$  co-expression *in vivo*. Lauterbach *et al.* [17] had previously demonstrated  
399 that splenic CD8 $\alpha$  DCs were the major producers of IFN- $\lambda$  following systemic treatment  
400 with poly(I:C), a TLR3 ligand, and we established that GFP expression in the IFN- $\lambda$   
401 reporter mouse was limited to that cell type (Fig 3) following i.v. administration of poly(I:C).  
402 We next asked whether GFP expression by the *Ifnl2<sup>gfp/gfp</sup>* reporter mouse would  
403 recapitulate the pattern of IFN- $\lambda$  expression previously described for heterologous  
404 rotavirus infection. Hernandez *et al.* [43] reported that IFN- $\lambda$  transcripts were present only  
405 in CD45- EPCAM+ intestinal epithelial cells, but not expressed by cells isolated from  
406 lamina propria during RV infection. We repeated this study in WT and IFN- $\lambda$  reporter  
407 suckling mice, harvesting tissue at the time point corresponding to maximal IFN

408 responsiveness post-infection. Elevated, and equivalent, levels of IFN- $\lambda$  were detected in  
409 intestinal homogenates from both strains following infection, with GFP expression  
410 detectable only in the epithelial compartment (Fig 6). We concluded from these results  
411 that GFP expression is an accurate indicator of IFN- $\lambda$  expression in this reporter mouse  
412 strain and, importantly, that IFN- $\lambda$  expression levels are equivalent in WT and *Ifnl2<sup>gfp/gfp</sup>*  
413 mice where production of IFN- $\lambda$ 3 protein compensates for the lack of the functional *IFNL2*  
414 gene.

415 The mucosal surfaces of the gastrointestinal and respiratory tracts are major portals of  
416 virus entry, and infection of these organs induces the secretion of both type I and type  
417 III IFNs [19, 22, 25, 43]. While both IFN types contribute to an effective antiviral  
418 response, receptor distribution suggests that type III IFNs have a primary role in  
419 protecting epithelial cells and that IFN- $\lambda$  production is therefore crucial to an effective  
420 antiviral response at these barrier surfaces. While it is established that epithelial cells  
421 are the major IFN- $\lambda$  producers during RNA virus infection of intestinal epithelial cells [10,  
422 19], we wished to determine whether this was also a feature of respiratory virus  
423 infection. Using an IFN- $\alpha$  reporter mouse, Kamagai *et al.* [5] had demonstrated that IFN-  
424  $\alpha$  production following NDV infection was limited to alveolar macrophages. This was a  
425 surprising and important finding as it had been widely understood that essentially all cell  
426 types produced type I IFNs in response to NDV infection *in vitro*. As many respiratory  
427 virus infections result in the production of both type I IFNs and type III IFNs, we wished  
428 to determine whether alveolar macrophages were the source of both cytokines, or  
429 whether these cytokines were produced by different cell types in response to the same  
430 viral pathogen.

431 NDV infection of the IFN- $\lambda$  reporter mouse resulted in GFP expression only by  
432 EPCAM+ epithelial cells as measured by flow cytometry and immunohistochemistry,  
433 and *in situ* hybridization studies detected IFN- $\lambda$  transcripts only in bronchial epithelial  
434 cells of NDV-infected animals. This result is consistent with other published studies that  
435 have described IFN- $\lambda$  production by mouse and human airway epithelial cells in  
436 response to respiratory viruses *in vivo* [23, 44-47]. Like Kumagai *et al.*, we observed  
437 IFN- $\alpha$  mRNA induction in alveolar macrophages isolated from the lungs of NDV-infected  
438 animals, but no IFN- $\lambda$  transcripts were detected in these cells. Therefore, NDV  
439 simultaneously induces both type I and type III IFNs upon respiratory infection, but each  
440 IFN type is produced by a different cell type.

441 Cellular recognition of RNA viruses generally occurs through recognition of viral  
442 genomes or viral transcripts by TLRs and RIG-I-like receptors, which signal through  
443 MyD88 and MAVS, respectively, to induce the expression of IFNs. TLRs are generally  
444 expressed by hematopoietic cells and RIG-I-like receptors by epithelial cells, although  
445 TLR3 expression at the apical surface of polarized murine and human tracheal epithelial  
446 cell cultures has been demonstrated [29]. Our results in MAVS<sup>-/-</sup> mice indicate that  
447 both IFN- $\alpha$  and IFN- $\lambda$  production following NDV infection requires MAVS activation, but  
448 we do not yet understand how activation of this pathway by the same virus leads to  
449 production of one or the other IFN type in a cell type dependent manner. The most likely  
450 explanation is suggested by work showing that MAVS is located on the surface of  
451 mitochondria and peroxisomes [48], and further, that signaling via MAVS on  
452 peroxisomes induces type III, but not type I IFN production [9]. Preferential IFN- $\lambda$   
453 synthesis following MAVS activation was found to depend upon the relative abundance

454 of peroxisomes in a given cell type, and polarization of intestinal epithelial cells resulted  
455 in increased numbers of these organelles. While these data predict a shift in the relative  
456 levels of type I and type III IFN production by different cell types, the complete absence  
457 of IFN- $\lambda$  synthesis by alveolar macrophages in infected animals was unexpected.  
458 Further investigation is required to understand this compartmentalization of IFN  
459 production that we observe *in vivo*.

460 As NDV infection is abortive in mammalian cells [49], it was of interest to repeat these  
461 studies using IAV, which replicates and causes disease in the murine host. Based on  
462 our NDV data, and published reports which suggested that infected epithelial cells were  
463 the primary source of type III IFNs in IAV infection [30, 45], we expected our influenza  
464 studies to confirm this conclusion, but this was not the case. By all approaches taken it  
465 appeared that, for IAV infection, the bulk of IFN- $\lambda$  was produced by pDCs rather than  
466 the respiratory epithelium. When pDC-depleted mice were infected with IAV, there was  
467 a 60% reduction in BAL levels of both type I and type III IFNs. Infection of bone marrow  
468 chimeras generated by the transfer of *Ifnl*<sup>-/-</sup> bone marrow into WT mice showed a  
469 similar decrease in type III IFN induction by IAV. In our study, ~ 40% of the IFN- $\lambda$   
470 induced by IAV was from non-pDC sources, but this was dependent on virus strain.  
471 While GFP<sup>+</sup> pDCs were detected using either the PR8 or WSN strains of IAV, only in  
472 WSN infections was epithelial IFN- $\lambda$  synthesis detected *in vivo* or *ex vivo*. The  
473 conclusion that type III IFN synthesis induced by PR8 came primarily from pDCs was  
474 further supported by studies in MAVS<sup>-/-</sup> animals which showed no impact on IFN- $\lambda$   
475 levels in the absence of this pathway in PR8 infection.

476 Also of interest was our finding that IFN- $\lambda$  production by IAV-exposed pDCs is type I  
477 IFN dependent. Our data suggest that the tonic signaling through the type I IFN receptor  
478 may be required to maintain the elevated basal levels of IRF7 which is a hallmark of this  
479 cell type [50]. While this result was unexpected, it is consistent with the observation that  
480 human subjects with a deficiency of IRF7 expression are more likely to experience life-  
481 threatening infections of influenza [51] as well as SARS-CoV-2 [52]. As both type I and  
482 type III IFNs are known to play a role in protection from respiratory viruses, this  
483 observation is further support of the hypothesis that pDCs are the major source of both  
484 of these cytokines during IAV infection. The demonstration that both IFN- $\alpha$  and IFN- $\lambda$   
485 are produced by IAV-exposed human pDCs [11] also supports this possibility.

486 In summary, we have used an IFN- $\lambda$  reporter mouse model to determine the source of  
487 type III IFNs in two mouse models of respiratory virus infection. For NDV, type I and  
488 type III IFNs are simultaneously induced through the engagement of the same virus  
489 sensing pathway, but from two distinct cell types with respiratory epithelium as the sole  
490 source of IFN- $\lambda$ . In IAV infection, pDCs appear to produce the bulk of type III IFN, and  
491 its production by this cell type requires type I IFN signaling. This study suggests that  
492 IFN induction by viruses *in vivo* is pathogen specific, as is the source of these cytokines.

493

## 494 **Methods**

### 495 **Generation of the IFN- $\lambda$ Reporter Mouse**

496 Generation of the IFN- $\lambda$  reporter mouse was carried out by ingenious Targeting  
497 Laboratory ([www.genetargeting.com](http://www.genetargeting.com)). The targeting vector was constructed using an  
498 11 kb region of a C57BL/6 BAC clone (RP23: 24B20), containing the *Irf1* locus, sub-  
499 cloned into the pSP72 backbone vector (Promega). A GFP/FRT-flanked neomycin

500 cassette was inserted into the BAC subclone using Red/ET recombineering technology,  
501 resulting in the complete replacement of the *IFNλ2* coding region of exons 1-5 (including  
502 intron sequences), with a long homology arm extending approximately 6.91 kb 5' to the  
503 site of the cassette insertion and a short homology arm that extends approximately 2.68  
504 kb 3' to the site of the cassette insertion. The GFP-Neomycin targeting vector was  
505 linearized by Not I enzymatic digestion and electroporated into BA1 (C57B/6 x  
506 129SvEv) hybrid embryonic stem cells. G418 resistant ES cell clones expanded for  
507 PCR analysis to identify homologous recombinants. Clones found to carry the GFP  
508 transgene were sequenced to confirm insertion, sequence fidelity, the genome/5'  
509 cassette junction and the genome/3' cassette junction. Southern blot analysis of  
510 positive clones was carried out using Apal digestion of PCR products hybridized with a  
511 probe targeted against the 5' external region. Targeted BA1 hybrid embryonic stem cells  
512 were microinjected into C57BL/6 blastocysts and resulting chimeras with a high  
513 percentage agouti coat color were mated to C57BL/6 FLP mice to remove the neomycin  
514 cassette. Tail DNA from pups with agouti or black coat color was analyzed by PCR to  
515 confirm presence of transgene. Animals heterozygous for the *Ifnλ2<sup>+gfp</sup>* allele  
516 were backcrossed onto the 129SvEv background for 10 generations, then bred to  
517 produce homozygous animals. Genotyping was carried out by two PCR reactions: One  
518 reaction using Primer A (5'-CAGAGCTGGAAACTCAGAGCC-3') and Primer B (5'-  
519 GACCGAGTCTGAGACCCACAAG-3') and another reaction using Primer C (5'-  
520 CAGAGCTGGAAACTCAGAGCC-3') and Primer B. Thermocycler conditions for those  
521 reactions were as follows: 95° C for 15 minutes, followed by 35 cycles of (94° C for 45  
522 minutes, 65° C for 1 minute, and 72° C for 1.5 minutes), with an end step of 72° C for 5

523 minutes. The amplicon generated by Primers A and B, which encompasses the *Ifn12* or  
524 *gfp* region, was then digested with the NcoI restriction endonuclease. NcoI treatment of  
525 the wildtype allele yields a 1100 bp band and a 700 bp band, while digestion of the  
526 amplicon containing the *Ifn12<sup>+gfp</sup>* allele, which lacks NcoI restriction sites, yields a single  
527 1110 bp band.

528

### 529 **Additional Mice**

530 Mice on the 129SvEv background lacking the type I IFN receptor (IFNAR<sup>-/-</sup>) were  
531 originally derived by Michel Aguet [53] and strain matched controls were purchased  
532 from Taconic Farms. MAVS<sup>-/-</sup> and MYD88<sup>-/-</sup> mice on the C57BL/6 background were  
533 obtained from Jackson Labs. Mx2-Luc Mx2 luciferase reporter mice were obtained from  
534 Hansjörg Hauser and Mario Köster [21]. Generation of the IFN- $\lambda$ <sup>-/-</sup> mice, lacking both  
535 the IFN- $\lambda$ 2 and - $\lambda$ 3, sequences is described in supplemental figure 2. All mice were  
536 maintained under specific pathogen-free conditions in the vivarium of Rutgers-New  
537 Jersey Medical School.

538

### 539 **Cell culture**

540 Bone-marrow derived FLT3-ligand dendritic cell cultures were generated from the  
541 bone marrow of IFN- $\lambda$  reporter mice, *ifn1*<sup>-/-</sup> mice and WT controls. Bone marrow from  
542 femurs and tibia of 6-10 week old mice was washed, depleted of red cells with ACK  
543 lysis buffer, and cultured in RPMI+10% FBS containing 100 ng/mL human FLT3-ligand  
544 (Peprotech), 50  $\mu$ M  $\beta$ -mercaptoethanol (Sigma), penicillin (100 IU/ml.) and streptomycin  
545 (100  $\mu$ g/ml) at a cell density of  $3 \times 10^6$  cells/ml for 7 – 8 days.



546

547 For preparation of kidney epithelial cells, kidney capsules were removed, renal  
548 parenchyma was minced into 1 mm<sup>3</sup> pieces and digested with collagenase IV  
549 (Worthington) at 37°C for 30 min. Following red blood cell lysis, digested tissue was  
550 pressed through a 100 µM, then a 40 µM cell strainer, and the recovered cells were  
551 washed and then plated in DMEM/HamsF12 with 10% FBS. After 1-2 hours of  
552 incubation, non-adherent cells were collected and plated on collagen-coated dishes.  
553 Cells were allowed to reach 70% confluence prior to virus infection.

554

555 Murine tracheal epithelial cells were derived from WT or IFN-λ reporter mice at 6 to 10  
556 weeks of age following the procedures outlined by You et al. [54].

557

### 558 **Poly I:C Treatment and Splenic DC Analysis**

559 6-10 week old IFN-λ reporter mice were injected intravenously with sterile PBS or 100  
560 µg polyI:C (InVivoGen). Splenocytes were harvested 6 hours after treatment, incubated  
561 with anti-mouse CD32/Fc-Block (BD Pharmingen) for 10 minutes at 4°C, then stained  
562 with the following antibodies: anti-mouse CD45-BUV395 (BD Horizon), anti-mouse  
563 CD3-APC Cy7 (BioLegend), anti-mouse CD11c-APC (eBioscience), anti-mouse CD11b-  
564 PerCP Cy5.5 (ebioscience), anti-mouse CD8α-V450 (BD Horizon), and anti-mouse  
565 Siglec-H-PE (eBioscience) antibodies. Analysis was carried out using the LSRII (BD  
566 Biosciences) flow cytometer.

567

568

569

570 **Virus infection and assay**

571 Six-day-old suckling mice were infected with  $4 \times 10^6$  PFU of the simian RRV strain by  
572 oral gavage. Intestines were harvested 24 hours post-infection. These were either  
573 formalin fixed or homogenized in medium for virus quantitation. RRV quantitation was  
574 done using a focus forming assay as previously described [19].

575 Six-10 week old mice, under isoflurane anesthesia, were infected intranasally with  $10^7$   
576 PFU of NDV (Hitchner B1 strain) in 50  $\mu$ l of PBS. Mice were euthanized 24 hours post-  
577 infection for collection of bronchoalveolar lavage fluid and lung tissue.

578 *In vitro* infection of primary kidney epithelial cells was carried out at a multiplicity of  
579 infection (MOI) of 2 and 20. Infections were done with RRV, the Hitchner B1 strain of  
580 NDV, the A2 strain of respiratory syncytial virus (RSV), and the WSN strain of influenza  
581 A virus (IAV).

582 A/PR8/34 and A/WSN/33 influenza viruses were grown in embryonated chicken eggs.  
583 Allantoic fluid was assayed for infectious viral particles by focus forming assay on MDCK  
584 cells. Serial dilutions of allantoic fluid were prepared and incubated on MDCK cells at  
585 37°C, in 5% CO<sub>2</sub> for 24 hours. Cells were then fixed in phosphate-buffered formalin, and  
586 viral plaques were visualized by incubating fixed cells with polyclonal rabbit anti-IAV  
587 serum (US Biologicals), followed by HRP-conjugated secondary antibodies for  
588 visualization of plaques via a colorimetric assay.

589

590

591

592 **Ethics statement**

593 All mouse studies were approved by the Institutional Animal Care and Use  
594 Committees of Rutgers-New Jersey Medical School (protocols 999900760 and  
595 13009C0316), performed in compliance with relevant institutional policies, local, state,  
596 and federal laws, and conducted following National Research Council Guide for the  
597 Care and Use of Laboratory Animals, Eighth Edition.

598

599 ***In vivo* luciferase detection**

600 Six-day old Mx2-Luc mice were injected intraperitoneally with D-Luciferin (15 µg per  
601 pup), (Perkin Elmer), anesthetized with isoflurane, and imaged using the IVIS-200 Vivo  
602 Vision system (Caliper). Gray-scale images followed by bioluminescent images were  
603 then acquired and superimposed using the Living Image software (Caliper).  
604 Bioluminescent images represent luciferase signal intensity, with red as highest and  
605 blue as lowest, respectively. Regions of interest with detectable luciferase activity were  
606 measured quantitatively as relative light units (RLUs) at 3, 6, 12, 24, 48, 72, and 96  
607 hours post-RRV infection.

608

609 **Immunostaining**

610 Harvested tissues were fixed in 10% neutral buffered formalin, and submitted for  
611 processing and paraffin embedding. Deparaffinized sections underwent antigen retrieval  
612 and were subsequently blocked with Superblock (ScyTek) for 5 minutes at room  
613 temperature, washed in wash buffer (PBS+0.05% Tween) and then stained using anti-  
614 NDV antibodies (US Biological), anti-RRV antibodies (Meridian), anti-eGFP (Life

615 Technologies) antibodies or anti-IAV antibodies (US Biological) overnight at 4°C. The  
616 following day, slides were washed in wash buffer and stained using anti-DyLight488  
617 (Abcam) or anti-DyLight564 (Abcam) secondary antibodies for 1 hour at room  
618 temperature in the dark, washed in wash buffer, and incubated with DAPI for 6 minutes.  
619 After washing in distilled water, mounting medium (Vectashield) was applied, and slides  
620 were coverslipped. Images were obtained using an Axiovert 200M inverted  
621 fluorescence microscope (Zeiss) using the AxioVision LE64 software (Zeiss).

622

### 623 **Lung digestion and flow cytometry analysis**

624 Perfused lungs were finely minced and digested in 5 mL of a 1.78mg/mL Collagenase  
625 IV (Worthington) solution in PBS (with Ca<sup>2+</sup>, Mg<sup>2+</sup>) for 45 minutes at 37°C. Lung digests  
626 were further dissociated by passage through a 20G needle, then filtration through a 100  
627 µm filter. ACK lysis buffer was used to remove red blood cells, and remaining cell  
628 suspension was washed twice with PBS. Lung cell suspensions were first blocked with  
629 anti-CD32/Fc-Block (BD Pharmingen) for 10 minutes at 4°C, then stained with cocktail  
630 of primary antibodies including: anti-mouse CD45-BUV395 (BD Horizon), anti-mouse  
631 EPCAM-PECy7 (BioLegend), anti-mouse Ly6G-Alexa Fluor 700 (BioLegend), anti-  
632 mouse F4/80-APC (BioLegend), anti-mouse CD11c-PerCPCy5.5 (BioLegend), anti-  
633 mouse CD11b-APC-Cy7 (BioLegend), and anti-mouse Siglec F-PE (BD Pharmingen).  
634 Cells were then washed in FACS buffer (PBS+2% FBS and sodium azide),  
635 resuspended in FACS Buffer containing DAPI, and analyzed using an LSRII flow  
636 cytometer (BD Biosciences). Sorting of stained cell populations was carried out on an  
637 Aria II Cell sorter (BD Biosciences).

638

639 **Plasmacytoid DC depletion**

640 Mice were injected i.p. with 500 µg of anti-PDCA1 or Rat IgG 24 and 48 hours before  
641 IAV infection. Mice were sacrificed 24 hours post-infection to collect BALS, and blood  
642 and spleens were collected to stain for pDC surface marker (CD11c+, CD11b-, B220+,  
643 PDCA1+).

644

645 ***In situ* hybridization**

646 *In situ* detection of IFN-λ transcripts was carried out using the RNA Scope® HD 2.5  
647 Detection Reagent-Red kit (Advanced Cell Technologies) according to manufacturer's  
648 instructions. Briefly, formalin-fixed, paraffin-embedded tissue sections were heated at  
649 60°C for 1 hour, deparaffinized in xylene and 100% alcohol, and incubated with  
650 hydrogen peroxide for 10 minutes at room temperature. Antigen retrieval was then  
651 carried out for 1 hour in RNA Scope antigen retrieval buffer, and slides were washed in  
652 distilled water and 100% ethanol, and then left to dry overnight. The following day,  
653 slides were washed in RNA Scope proprietary wash buffer and incubated in protease-  
654 plus buffer, washed again, and then incubated with mouse IFNλ2/3 DNA probes  
655 (Advanced Cell Technologies), followed by a series of RNA Scope adaptor probes,  
656 streptavidin-HRP, and chromogen solution to visualize IFN-λ transcripts. Slides were  
657 counterstained with 50% Lillie Mayer's hematoxylin (American Master Tech Scientific  
658 Inc).

659

660

661 **RNA isolation and qRT-PCR**

662 RNA from cells was obtained using the RNA Easy Kit (Qiagen) incorporating the  
663 DNase I step to remove contaminating genomic DNA. cDNA was synthesized using  
664 iScript cDNA Synthesis kit (Biorad) using 10 ng RNA, with 10% of the cDNA product  
665 used for qPCR analysis. The following primer pairs were used to carry out qPCR  
666 reactions in a CFX96 Real Time System (BioRad) using SYBR Green (BioRad):

667 IFN $\lambda$ 2/3 Forward 5'-TCAAGC ACCTCTTCTCGATGG-3'

668 IFN $\lambda$ 2/3 Reverse 5'-AGCTGCAGGCCTTCAAAAAG-3'

669 IFN $\alpha$  Forward 5'-TCTGATGCAGCAGGTGGG-3'

670 IFN $\alpha$  Reverse 5'-AGGGCTCTCCAGACTTCTGCTCTG-3'

671 18s rRNA Forward 5'-GTAACCCGTTGAACCCCAT-3'

672 18s rRNA Reverse 5'-CCATCCAATCGGTAGTAGCG-3'

673 eGFP Forward 5'-GACGTAAACGGCCACAAGTT-3'

674 eGFP Reverse 5'-ATG CCGTTCTTCTGCTTGT-3'

675 Thermocycler conditions were set with the following parameters for amplification of  
676 IFN $\lambda$ 2/3 transcripts: 95°C for 3 minutes, followed by 40 cycles of 95°C for 10 seconds  
677 and a gene-specific annealing temperature for 30 seconds. Gene-specific annealing  
678 temperatures for IFN $\lambda$ 2/3, IFN $\alpha$ , eGFP were 58.4°C, 61.3°C, and 58.4°C, respectively.  
679 18s rRNA qPCR reactions using the same annealing temperature as the target gene of  
680 interest were carried out simultaneously. Relative normalized expression was  
681 determined by normalizing amplification of IFN- $\lambda$ , IFN- $\alpha$ , or eGFP expression to 18s  
682 rRNA levels by the  $\Delta\Delta$ Ct method [PMID 11846609].

683

684 **Data analysis**

685 Data were analyzed using GraphPad Prism version 7 (graphPad Software). Mean and  
686 SEM were calculated by the same.

687  
688 **Acknowledgments**

689 Authors are thankful to Hansjörg Hauser and Mario Köster for Mx2-luciferase reporter  
691 mice. Histology and Imaging were done with the assistance of the New Jersey Medical  
692 Histology and Imaging Core Laboratory. This work was funded by grants from the  
693 National Institutes of Health: R21 AI073597 (JED), U01 AI082994 (JED) and R01  
694 AI104264 (SVK and JED).

695  
696  
697  
698  
699

700  
701 **Literature Cited**

- 702  
703 1. Isaacs A, Lindenmann J. Virus interference. I. The interferon. Proc R Soc Lond B  
704 Biol Sci. 1957;147(927):258-67. PubMed PMID: 13465720.  
705 2. Isaacs A, Lindenmann J, Valentine RC. Virus interference. II. Some properties of  
706 interferon. Proc R Soc Lond B Biol Sci. 1957;147(927):268-73. PubMed PMID:  
707 13465721.  
708 3. Kotenko SV, Gallagher G, Baurin VV, Lewis-Antes A, Shen M, Shah NK, et al.  
709 IFN-lambdas mediate antiviral protection through a distinct class II cytokine receptor  
710 complex. Nat Immunol. 2003;4(1):69-77. Epub 2002/12/17. doi: 10.1038/ni875. PubMed  
711 PMID: 12483210.  
712 4. Sheppard P, Kindsvogel W, Xu W, Henderson K, Schlutsmeyer S, Whitmore TE,  
713 et al. IL-28, IL-29 and their class II cytokine receptor IL-28R. Nat Immunol.  
714 2003;4(1):63-8. Epub 2002/12/07. doi: 10.1038/ni873. PubMed PMID: 12469119.  
715 5. Kumagai Y, Takeuchi O, Kato H, Kumar H, Matsui K, Morii E, et al. Alveolar  
716 macrophages are the primary interferon-alpha producer in pulmonary infection with

- 717 RNA viruses. *Immunity*. 2007;27(2):240-52. doi: 10.1016/j.immuni.2007.07.013.  
718 PubMed PMID: 17723216.
- 719 6. Goritzka M, Makris S, Kausar F, Durant LR, Pereira C, Kumagai Y, et al. Alveolar  
720 macrophage-derived type I interferons orchestrate innate immunity to RSV through  
721 recruitment of antiviral monocytes. *J Exp Med*. 2015;212(5):699-714. doi:  
722 10.1084/jem.20140825. PubMed PMID: 25897172; PubMed Central PMCID:  
723 PMC4419339.
- 724 7. Kottenko SV, Durbin JE. Contribution of type III interferons to antiviral immunity:  
725 location, location, location. *J Biol Chem*. 2017;292(18):7295-303. Epub 2017/03/16. doi:  
726 10.1074/jbc.R117.777102. PubMed PMID: 28289095; PubMed Central PMCID:  
727 PMC5418032.
- 728 8. Lazear HM, Nice TJ, Diamond MS. Interferon-lambda: Immune Functions at  
729 Barrier Surfaces and Beyond. *Immunity*. 2015;43(1):15-28. Epub 2015/07/23. doi:  
730 10.1016/j.immuni.2015.07.001. PubMed PMID: 26200010; PubMed Central PMCID:  
731 PMC4527169.
- 732 9. Odendall C, Dixit E, Stavru F, Bierne H, Franz KM, Durbin AF, et al. Diverse  
733 intracellular pathogens activate type III interferon expression from peroxisomes. *Nat*  
734 *Immunol*. 2014;15(8):717-26. doi: 10.1038/ni.2915. PubMed PMID: 24952503; PubMed  
735 Central PMCID: PMC4106986.
- 736 10. Mahlakoiv T, Hernandez P, Gronke K, Diefenbach A, Staeheli P. Leukocyte-  
737 derived IFN-alpha/beta and epithelial IFN-lambda constitute a compartmentalized  
738 mucosal defense system that restricts enteric virus infections. *PLoS Pathog*.  
739 2015;11(4):e1004782. doi: 10.1371/journal.ppat.1004782. PubMed PMID: 25849543;  
740 PubMed Central PMCID: PMC4388470.
- 741 11. Yin Z, Dai J, Deng J, Sheikh F, Natalia M, Shih T, et al. Type III IFNs are  
742 produced by and stimulate human plasmacytoid dendritic cells. *J Immunol*.  
743 2012;189(6):2735-45. doi: 10.4049/jimmunol.1102038. PubMed PMID: 22891284;  
744 PubMed Central PMCID: PMC3579503.
- 745 12. Brehm G, Kirchner H. Analysis of the interferons induced in mice in vivo and in  
746 macrophages in vitro by Newcastle disease virus and by polyinosinic-polycytidylic acid.  
747 *J Interferon Res*. 1986;6(1):21-8. PubMed PMID: 2422299.
- 748 13. Wimmers F, Subedi N, van Buuringen N, Heister D, Vivie J, Beeren-Reinieren I,  
749 et al. Single-cell analysis reveals that stochasticity and paracrine signaling control  
750 interferon-alpha production by plasmacytoid dendritic cells. *Nat Commun*.  
751 2018;9(1):3317. Epub 2018/08/22. doi: 10.1038/s41467-018-05784-3. PubMed PMID:  
752 30127440; PubMed Central PMCID: PMC6102223.
- 753 14. Ank N, West H, Bartholdy C, Eriksson K, Thomsen AR, Paludan SR. Lambda  
754 interferon (IFN-lambda), a type III IFN, is induced by viruses and IFNs and displays  
755 potent antiviral activity against select virus infections in vivo. *J Virol*. 2006;80(9):4501-9.  
756 Epub 2006/04/14. doi: 10.1128/JVI.80.9.4501-4509.2006. PubMed PMID: 16611910;  
757 PubMed Central PMCID: PMC1472004.
- 758 15. Ank N, Iversen MB, Bartholdy C, Staeheli P, Hartmann R, Jensen UB, et al. An  
759 important role for type III interferon (IFN-lambda/IL-28) in TLR-induced antiviral activity.  
760 *J Immunol*. 2008;180(4):2474-85. PubMed PMID: 18250457.
- 761 16. Coccia EM, Severa M, Giacomini E, Monneron D, Remoli ME, Julkunen I, et al.  
762 Viral infection and Toll-like receptor agonists induce a differential expression of type I



- 763 and lambda interferons in human plasmacytoid and monocyte-derived dendritic cells.  
764 Eur J Immunol. 2004;34(3):796-805. Epub 2004/03/03. doi: 10.1002/eji.200324610.  
765 PubMed PMID: 14991609.
- 766 17. Lauterbach H, Bathke B, Gilles S, Traidl-Hoffmann C, Lubber CA, Fejer G, et al.  
767 Mouse CD8alpha+ DCs and human BDCA3+ DCs are major producers of IFN-lambda  
768 in response to poly IC. J Exp Med. 2010;207(12):2703-17. doi: 10.1084/jem.20092720.  
769 PubMed PMID: 20975040; PubMed Central PMCID: PMC2989774.
- 770 18. Crawford SE, Ramani S, Tate JE, Parashar UD, Svensson L, Hagbom M, et al.  
771 Rotavirus infection. Nat Rev Dis Primers. 2017;3:17083. Epub 2017/11/10. doi:  
772 10.1038/nrdp.2017.83. PubMed PMID: 29119972.
- 773 19. Lin JD, Feng N, Sen A, Balan M, Tseng HC, McElrath C, et al. Distinct Roles of  
774 Type I and Type III Interferons in Intestinal Immunity to Homologous and Heterologous  
775 Rotavirus Infections. PLoS Pathog. 2016;12(4):e1005600. doi:  
776 10.1371/journal.ppat.1005600. PubMed PMID: 27128797; PubMed Central PMCID:  
777 PMC4851417.
- 778 20. Pott J, Mahlakoiv T, Mordstein M, Duerr CU, Michiels T, Stockinger S, et al. IFN-  
779 lambda determines the intestinal epithelial antiviral host defense. Proc Natl Acad Sci U  
780 S A. 2011;108(19):7944-9. Epub 2011/04/27. doi: 10.1073/pnas.1100552108. PubMed  
781 PMID: 21518880; PubMed Central PMCID: PMC3093475.
- 782 21. Pulverer JE, Rand U, Lienenklaus S, Kugel D, Zietara N, Kochs G, et al.  
783 Temporal and spatial resolution of type I and III interferon responses in vivo. J Virol.  
784 2010;84(17):8626-38. Epub 2010/06/25. doi: 10.1128/JVI.00303-10. PubMed PMID:  
785 20573823; PubMed Central PMCID: PMC2919002.
- 786 22. Jewell NA, Cline T, Mertz SE, Smirnov SV, Flano E, Schindler C, et al. Lambda  
787 interferon is the predominant interferon induced by influenza A virus infection in vivo. J  
788 Virol. 2010;84(21):11515-22. doi: 10.1128/JVI.01703-09. PubMed PMID: 20739515;  
789 PubMed Central PMCID: PMC2953143.
- 790 23. Khaitov MR, Laza-Stanca V, Edwards MR, Walton RP, Rohde G, Contoli M, et al.  
791 Respiratory virus induction of alpha-, beta- and lambda-interferons in bronchial epithelial  
792 cells and peripheral blood mononuclear cells. Allergy. 2009;64(3):375-86. Epub  
793 2009/01/30. doi: 10.1111/j.1398-9995.2008.01826.x. PubMed PMID: 19175599.
- 794 24. Mordstein M, Neugebauer E, Ditt V, Jessen B, Rieger T, Falcone V, et al.  
795 Lambda interferon renders epithelial cells of the respiratory and gastrointestinal tracts  
796 resistant to viral infections. J Virol. 2010;84(11):5670-7. Epub 2010/03/26. doi:  
797 10.1128/JVI.00272-10. PubMed PMID: 20335250; PubMed Central PMCID:  
798 PMC2876583.
- 799 25. Mahlakoiv T, Ritz D, Mordstein M, DeDiego ML, Enjuanes L, Muller MA, et al.  
800 Combined action of type I and type III interferon restricts initial replication of severe  
801 acute respiratory syndrome coronavirus in the lung but fails to inhibit systemic virus  
802 spread. J Gen Virol. 2012;93(Pt 12):2601-5. doi: 10.1099/vir.0.046284-0. PubMed  
803 PMID: 22956738.
- 804 26. de Maeyer-Guignard J, de Maeyer E. Effect of antilymphocytic serum on  
805 circulating interferon in mice as a function of the inducer. Nat New Biol.  
806 1971;229(7):212-4. Epub 1971/02/17. PubMed PMID: 4325471.
- 807 27. Honda K, Sakaguchi S, Nakajima C, Watanabe A, Yanai H, Matsumoto M, et al.  
808 Selective contribution of IFN-alpha/beta signaling to the maturation of dendritic cells

- 809 induced by double-stranded RNA or viral infection. *Proc Natl Acad Sci U S A*.  
810 2003;100(19):10872-7. Epub 2003/09/10. doi: 10.1073/pnas.1934678100. PubMed  
811 PMID: 12960379; PubMed Central PMCID: PMCPMC196895.
- 812 28. Hillyer P, Mane VP, Schramm LM, Puig M, Verthelyi D, Chen A, et al. Expression  
813 profiles of human interferon-alpha and interferon-lambda subtypes are ligand- and cell-  
814 dependent. *Immunol Cell Biol*. 2012;90(8):774-83. Epub 2012/01/18. doi:  
815 10.1038/icb.2011.109. PubMed PMID: 22249201; PubMed Central PMCID:  
816 PMCPMC3442264.
- 817 29. Ioannidis I, Ye F, McNally B, Willette M, Flano E. Toll-like receptor expression  
818 and induction of type I and type III interferons in primary airway epithelial cells. *J Virol*.  
819 2013;87(6):3261-70. doi: 10.1128/JVI.01956-12. PubMed PMID: 23302870; PubMed  
820 Central PMCID: PMCPMC3592129.
- 821 30. Galani IE, Triantafyllia V, Eleminiadou EE, Koltsida O, Stavropoulos A,  
822 Manioudaki M, et al. Interferon-lambda Mediates Non-redundant Front-Line Antiviral  
823 Protection against Influenza Virus Infection without Compromising Host Fitness.  
824 *Immunity*. 2017;46(5):875-90 e6. Epub 2017/05/18. doi: 10.1016/j.immuni.2017.04.025.  
825 PubMed PMID: 28514692.
- 826 31. Kato H, Takeuchi O, Sato S, Yoneyama M, Yamamoto M, Matsui K, et al.  
827 Differential roles of MDA5 and RIG-I helicases in the recognition of RNA viruses.  
828 *Nature*. 2006;441(7089):101-5. Epub 2006/04/21. doi: 10.1038/nature04734. PubMed  
829 PMID: 16625202.
- 830 32. Lund JM, Alexopoulou L, Sato A, Karow M, Adams NC, Gale NW, et al.  
831 Recognition of single-stranded RNA viruses by Toll-like receptor 7. *Proc Natl Acad Sci*  
832 *U S A*. 2004;101(15):5598-603. Epub 2004/03/23. doi: 10.1073/pnas.0400937101.  
833 PubMed PMID: 15034168; PubMed Central PMCID: PMCPMC397437.
- 834 33. Diebold SS, Kaisho T, Hemmi H, Akira S, Reis e Sousa C. Innate antiviral  
835 responses by means of TLR7-mediated recognition of single-stranded RNA. *Science*.  
836 2004;303(5663):1529-31. Epub 2004/02/21. doi: 10.1126/science.1093616. PubMed  
837 PMID: 14976261.
- 838 34. Koyama S, Ishii KJ, Kumar H, Tanimoto T, Coban C, Uematsu S, et al.  
839 Differential role of TLR- and RLR-signaling in the immune responses to influenza A  
840 virus infection and vaccination. *J Immunol*. 2007;179(7):4711-20. Epub 2007/09/20. doi:  
841 10.4049/jimmunol.179.7.4711. PubMed PMID: 17878370.
- 842 35. Mordstein M, Kochs G, Dumoutier L, Renauld JC, Paludan SR, Klucher K, et al.  
843 Interferon-lambda contributes to innate immunity of mice against influenza A virus but  
844 not against hepatotropic viruses. *PLoS Pathog*. 2008;4(9):e1000151. Epub 2008/09/13.  
845 doi: 10.1371/journal.ppat.1000151. PubMed PMID: 18787692; PubMed Central PMCID:  
846 PMCPMC2522277.
- 847 36. Izaguirre A, Barnes BJ, Amrute S, Yeow WS, Megjugorac N, Dai J, et al.  
848 Comparative analysis of IRF and IFN-alpha expression in human plasmacytoid and  
849 monocyte-derived dendritic cells. *J Leukoc Biol*. 2003;74(6):1125-38. Epub 2003/09/10.  
850 doi: 10.1189/jlb.0603255. PubMed PMID: 12960254.
- 851 37. Osterlund PI, Pietila TE, Veckman V, Kotenko SV, Julkunen I. IFN regulatory  
852 factor family members differentially regulate the expression of type III IFN (IFN-lambda)  
853 genes. *J Immunol*. 2007;179(6):3434-42. Epub 2007/09/06. doi:  
854 10.4049/jimmunol.179.6.3434. PubMed PMID: 17785777.

- 855 38. Hatesuer B, Hoang HT, Riese P, Trittel S, Gerhauser I, Elbahesh H, et al.  
856 Deletion of Irf3 and Irf7 Genes in Mice Results in Altered Interferon Pathway Activation  
857 and Granulocyte-Dominated Inflammatory Responses to Influenza A Infection. *J Innate*  
858 *Immun.* 2017;9(2):145-61. Epub 2016/11/05. doi: 10.1159/000450705. PubMed PMID:  
859 27811478; PubMed Central PMCID: PMC6738875.
- 860 39. Doyle SE, Schreckhise H, Khuu-Duong K, Henderson K, Rosler R, Storey H, et  
861 al. Interleukin-29 uses a type 1 interferon-like program to promote antiviral responses in  
862 human hepatocytes. *Hepatology.* 2006;44(4):896-906. Epub 2006/09/29. doi:  
863 10.1002/hep.21312. PubMed PMID: 17006906.
- 864 40. Marcello T, Grakoui A, Barba-Spaeth G, Machlin ES, Kotenko SV, MacDonald  
865 MR, et al. Interferons alpha and lambda inhibit hepatitis C virus replication with distinct  
866 signal transduction and gene regulation kinetics. *Gastroenterology.* 2006;131(6):1887-  
867 98. Epub 2006/11/08. doi: 10.1053/j.gastro.2006.09.052. PubMed PMID: 17087946.
- 868 41. Broggi A, Tan Y, Granucci F, Zanoni I. IFN-lambda suppresses intestinal  
869 inflammation by non-translational regulation of neutrophil function. *Nat Immunol.*  
870 2017;18(10):1084-93. Epub 2017/08/29. doi: 10.1038/ni.3821. PubMed PMID:  
871 28846084; PubMed Central PMCID: PMC6701513.
- 872 42. Espinosa V, Dutta O, McElrath C, Du P, Chang YJ, Cicciarelli B, et al. Type III  
873 interferon is a critical regulator of innate antifungal immunity. *Sci Immunol.* 2017;2(16).  
874 Epub 2017/10/08. doi: 10.1126/sciimmunol.aan5357. PubMed PMID: 28986419.
- 875 43. Hernandez PP, Mahlakoiv T, Yang I, Schwierzeck V, Nguyen N, Guendel F, et al.  
876 Interferon-lambda and interleukin 22 act synergistically for the induction of interferon-  
877 stimulated genes and control of rotavirus infection. *Nat Immunol.* 2015;16(7):698-707.  
878 doi: 10.1038/ni.3180. PubMed PMID: 26006013; PubMed Central PMCID:  
879 PMC674589158.
- 880 44. Okabayashi T, Kojima T, Masaki T, Yokota S, Imaizumi T, Tsutsumi H, et al.  
881 Type-III interferon, not type-I, is the predominant interferon induced by respiratory  
882 viruses in nasal epithelial cells. *Virus Res.* 2011;160(1-2):360-6. doi:  
883 10.1016/j.virusres.2011.07.011. PubMed PMID: 21816185.
- 884 45. Crotta S, Davidson S, Mahlakoiv T, Desmet CJ, Buckwalter MR, Albert ML, et al.  
885 Type I and type III interferons drive redundant amplification loops to induce a  
886 transcriptional signature in influenza-infected airway epithelia. *PLoS Pathog.*  
887 2013;9(11):e1003773. Epub 2013/11/28. doi: 10.1371/journal.ppat.1003773. PubMed  
888 PMID: 24278020; PubMed Central PMCID: PMC673836735.
- 889 46. Bosco A, Wiehler S, Proud D. Interferon regulatory factor 7 regulates airway  
890 epithelial cell responses to human rhinovirus infection. *BMC Genomics.* 2016;17:76.  
891 Epub 2016/01/27. doi: 10.1186/s12864-016-2405-z. PubMed PMID: 26810609; PubMed  
892 Central PMCID: PMC674727386.
- 893 47. Fox JM, Crabtree JM, Sage LK, Tompkins SM, Tripp RA. Interferon Lambda  
894 Upregulates IDO1 Expression in Respiratory Epithelial Cells After Influenza Virus  
895 Infection. *J Interferon Cytokine Res.* 2015;35(7):554-62. doi: 10.1089/jir.2014.0052.  
896 PubMed PMID: 25756191; PubMed Central PMCID: PMC674507134.
- 897 48. Dixit E, Boulant S, Zhang Y, Lee AS, Odendall C, Shum B, et al. Peroxisomes  
898 are signaling platforms for antiviral innate immunity. *Cell.* 2010;141(4):668-81. doi:  
899 10.1016/j.cell.2010.04.018. PubMed PMID: 20451243; PubMed Central PMCID:  
900 PMC670185.

- 901 49. Mentkevich LM, Orlova TG. Multiplication of Newcastle disease virus strains and  
902 interferon production in the mouse, an animal naturally insusceptible to this infection.  
903 *Acta Virol.* 1966;10(3):226-9. Epub 1966/05/01. PubMed PMID: 4381333.
- 904 50. Honda K, Yanai H, Negishi H, Asagiri M, Sato M, Mizutani T, et al. IRF-7 is the  
905 master regulator of type-I interferon-dependent immune responses. *Nature.*  
906 2005;434(7034):772-7. Epub 2005/04/01. doi: 10.1038/nature03464. PubMed PMID:  
907 15800576.
- 908 51. Ciancanelli MJ, Huang SX, Luthra P, Garner H, Itan Y, Volpi S, et al. Infectious  
909 disease. Life-threatening influenza and impaired interferon amplification in human IRF7  
910 deficiency. *Science.* 2015;348(6233):448-53. Epub 2015/03/31. doi:  
911 10.1126/science.aaa1578. PubMed PMID: 25814066; PubMed Central PMCID:  
912 PMCPMC4431581.
- 913 52. Zhang Q, Bastard P, Liu Z, Le Pen J, Moncada-Velez M, Chen J, et al. Inborn  
914 errors of type I IFN immunity in patients with life-threatening COVID-19. *Science.*  
915 2020;370(6515). Epub 2020/09/26. doi: 10.1126/science.abd4570. PubMed PMID:  
916 32972995; PubMed Central PMCID: PMCPMC7857407.
- 917 53. Muller U, Steinhoff U, Reis LF, Hemmi S, Pavlovic J, Zinkernagel RM, et al.  
918 Functional role of type I and type II interferons in antiviral defense. *Science.*  
919 1994;264(5167):1918-21. Epub 1994/06/24. doi: 10.1126/science.8009221. PubMed  
920 PMID: 8009221.
- 921 54. You Y, Brody SL. Culture and differentiation of mouse tracheal epithelial cells.  
922 *Methods Mol Biol.* 2013;945:123-43. Epub 2012/10/26. doi: 10.1007/978-1-62703-125-  
923 7\_9. PubMed PMID: 23097105.
- 924
- 925

926 **Figure Legends**

927 **Figure 1. Generating the IFN- $\lambda$  Reporter Mouse.**

928 (A) The targeting vector carrying *eGFP* and *Neo* genes was inserted into the *Ifnl2*  
929 locus by homologous recombination, resulting in complete replacement of the *Ifnl2*  
930 coding region with the *eGfp* and *Neo* genes. Excision of the *Neo* gene was carried out  
931 by crossing mice carrying the targeted allele with Flipase mice, resulting in deletion of  
932 the *Neo* gene and generation of the *Ifnl2<sup>+/gfp</sup>* allele. (B) PCR products generated with  
933 primers shown in (A), and digested with *Nco1*, yielded unique banding patterns for tail  
934 DNA obtained from WT 129 SvEv mice (+/+), heterozygous *Ifnl2<sup>+/gfp</sup>* (+/-), and  
935 homozygous *Ifnl2<sup>gfp/gfp</sup>* IFN- $\lambda$  reporter animals. (C) Pictured are phase contrast and  
936 GFP immunofluorescence images (200x) of uninfected or NDV-infected, FLT3L  
937 cultured, bone marrow derived DCs from *Ifnl2<sup>gfp/gfp</sup>* mice. Images are representative of  
938 three independent experiments. (D) NDV-infected FLT3L cultured, bone marrow derived  
939 DCs were cell sorted into GFP+ and GFP- fractions that were then assayed by qRT-  
940 PCR for the presence of GFP and IFN- $\lambda$ 3 transcripts. Data are representative of two  
941 independent experiments. (E) Flow cytometry dot plots show GFP expression in  
942 cultures of primary kidney epithelial cells (gated as EPCAM+ cells) derived from  
943 *Ifnl2<sup>gfp/gfp</sup>* mice that were mock-infected or infected with Newcastle disease virus (NDV),  
944 rhesus rotavirus (RRV), respiratory syncytial virus (RSV), or influenza A virus (IAV) at  
945 the indicated MOIs for 24 hrs. Data are representative of two independent experiments.  
946  
947



948 **Figure 2. CD8 $\alpha$  DCs are the predominant IFN- $\lambda$ -producing cells in spleens of mice**  
949 **treated intravenously with poly I:C.**

950 (A) Flow cytometry analysis of splenic populations from IFN- $\lambda$  reporter mice mock-  
951 treated (left) or i.v. treated with poly I:C (right) for 6 hrs. Cells were gated on CD11c  
952 while simultaneously excluding CD3<sup>+</sup> cells to exclude T cells. Dendritic cell populations  
953 were then identified as follows: pDCs (CD11c<sup>+</sup>/Siglec-H<sup>+</sup>/CD11b<sup>-</sup>); CD8 $\alpha$  DCs (Siglec-  
954 H<sup>-</sup>/CD11b<sup>-</sup>/CD8 $\alpha$ <sup>+</sup>); cDCs (Siglec-H<sup>-</sup>/CD11b<sup>+</sup>/CD11c<sup>+</sup>). (B) Mean percentages, with  
955 SEM, of GFP<sup>+</sup> cells in populations shown in (A). Data are representative of two  
956 independent experiments.

957

958 **Figure 3. Epithelial cells are the predominant IFN- $\lambda$ -producing cell population in**  
959 **the small intestine in response to RRV.**

960 (A) Interferon responses of 6-day old, RRV-infected Mx2-Luciferase transgenic mice  
961 were quantitated by IVIS at the indicated timepoints. (B) Graphical representation of  
962 mean luciferase activity values and SEM from two independent experiments. (C) ELISA  
963 measurements of IFN- $\lambda$  protein in homogenates of intestinal tissue harvested from 6-  
964 day old WT C57BL/6 pups, 24 hours after RRV infection. (D) Comparison of RRV viral  
965 titers, measured by fluorescent-focus assay, in the small intestine of 6-day old WT 129  
966 SvEV mice and IFN- $\lambda$  reporter mice 3 days post-RRV infection. Data are pooled from  
967 two independent experiments. (E) Images of formalin-fixed paraffin-embedded (FFPE)  
968 small intestinal tissue sections from mock- or RRV-infected IFN- $\lambda$  reporter pups, and  
969 RRV-infected WT pups, were captured 24 hours post-infection. Sections were probed

970 with anti-GFP antibodies (green), anti-RRV sera (red) and DAPI (blue) and visualized by  
971 fluorescence microscopy. Images are representative of three independent experiments.

972

973 **Figure 4. Epithelial cells are the predominant IFN- $\lambda$  producers in response to NDV**  
974 **infection *in vivo*.**

975 (A) GFP expression was assayed by flow cytometry of cells obtained from collagenase-  
976 digested lungs of IFN- $\lambda$  reporter mice which were mock-infected or infected intranasally  
977 with NDV for 24 hrs. Epithelial cells were defined as CD45<sup>-</sup>, EPCAM<sup>+</sup>. WT 129SvEV  
978 mice were included as controls for GFP expression, gating in the same manner. (B)  
979 Graphical representation of mean percentage of GFP<sup>+</sup> epithelial cells from each  
980 treatment cohort. Error bars represent SEM. (C) IFN- $\lambda$  protein levels in BALs harvested  
981 at 24 hours from mock-infected or NDV-infected reporter mice were determined by  
982 ELISA. (D) Lung sections from uninfected IFN- $\lambda$  reporter mice, and NDV-infected WT  
983 and NDV-infected IFN- $\lambda$  reporter mice were stained with anti-GFP antibodies (green),  
984 anti-NDV antibodies (red), and DAPI (blue). Data are representative of three  
985 independent experiments.

986

987 **Figure 5. WT and IFN- $\lambda$  reporter mice produce similar levels of type I and type III**  
988 **IFNs following NDV infection *in vivo*.**

989 (A) Levels of IFN- $\lambda$  and (B) IFN- $\alpha$  proteins in BAL samples from WT or IFN- $\lambda$  reporter  
990 mice 24 hours after mock- or NDV ( $10^7$  pfu) infection were quantified by ELISA. Data  
991 are pooled from two independent experiments.

992

993 **Figure 6. Alveolar macrophages and other myeloid cells do not produce IFN- $\lambda$**   
994 **during NDV infections *in vivo*.** GFP expression was assayed by flow cytometry  
995 analysis of cells obtained from collagenase-digested lungs of mock-infected or NDV-  
996 infected IFN- $\lambda$  reporter mice or infected WT animals. Cell populations are defined as  
997 follows: alveolar macrophages (F4/80+, Ly6G-, SiglecF+, CD11c+), neutrophils (F4/80-,  
998 LY6G+), monocyte-derived macrophages (F4/80+, Ly6G-, SiglecF-, CD11c-) , and  
999 eosinophils (F4/80+, Ly6G-, SiglecF+, CD11c-). Data is representative of three  
1000 independent experiments.

1001  
1002 **Figure 7. Kinetics of IFN- $\lambda$  induction by NDV *in vivo***  
1003 GFP expression by (A) alveolar macrophages and (B) respiratory epithelial cells  
1004 obtained from the lungs of mock- or NDV-infected IFN- $\lambda$  reporter mice was assayed by  
1005 flow cytometry. Samples were obtained at post-infection intervals of 10, 24, and 48  
1006 hours. (C) Graphical representation of mean % of GFP+ cells at each time point. Data  
1007 are representative of two independent experiments.

1008  
1009 **Figure 8. Distinct cell sources of IFN- $\alpha$  and IFN- $\lambda$  *in vivo*.**  
1010 (A) Cell sorting strategy for isolation of alveolar macrophage and epithelial cell  
1011 populations from collagenase-digested lungs obtained from mock- or NDV-infected WT  
1012 mice 24 hours post-infection mice. Isolated populations of epithelial cells (CD45-  
1013 /EPCAM+) and alveolar macrophages (as CD45+/F4/80+/Siglec F+/CD11c+) are  
1014 indicated with an asterisk. (B) RNA harvested from FACS-sorted epithelial cells and  
1015 alveolar macrophages and used to synthesize cDNA for detection of endogenous



1016 IFN $\lambda$ 2/3 transcripts by qPCR. qPCR detection of endogenous pan-IFN $\alpha$  transcripts  
1017 (non-IFN $\alpha$ 4) was also performed on FACS-sorted (C) alveolar macrophages and (D)  
1018 epithelial cells. Expression is shown normalized to 18s rRNA. Data are pooled from two  
1019 independent experiments. (E) *In situ* hybridization assays to detect endogenous IFN- $\lambda$   
1020 transcripts were carried out on FFPE lung sections from NDV-infected WT and IFN- $\lambda$   
1021 reporter mice at the 24 hour time point using probes specific for IFN- $\lambda$ 2/3 transcripts  
1022 (seen in red). Images are representative of two independent experiments.

1023

1024 **Figure 9. NDV infection of alveolar macrophages *in vitro*.**

1025 (A) Sorting strategy for the isolation of alveolar macrophages from collagenase-digested  
1026 lungs of uninfected WT mice. Isolated alveolar macrophages were then infected with  
1027 NDV *in vitro* at the indicated MOIs. Supernatants and RNA samples were collected at  
1028 24 hours post-infection. (B) cDNA was synthesized from the RNA of mock- or NDV-  
1029 infected cells and used to detect *Ifnl2/3* expression by qPCR. RNA isolated from cells  
1030 stably transfected with a construct expressing FLAG-tagged murine IFN- $\lambda$ 2 (FL-mIFN-  
1031  $\lambda$ 2 cells) was included as a positive control. (C) Levels of IFN- $\lambda$  and IFN- $\alpha$  proteins  
1032 secreted into the medium by cultured alveolar macrophages were determined by ELISA.  
1033 Culture medium from FL-mIFN- $\lambda$ 2 cells was used as a positive control. Data are  
1034 representative of two independent experiments

1035

1036 **Figure 10. Plasmacytoid dendritic cells are the major producers of IFN- $\lambda$  during**

1037 **IAV infections *in vivo***

1038 (A) BAL samples collected from mock-infected or IAV-infected IFN- $\lambda$  reporter mice were  
1039 assayed by ELISA for the measurement of IFN- $\lambda$  protein in airways. (B) Representative  
1040 flow cytometry plots evaluating GFP expression specifically in epithelial cells,  
1041 characterized as EPCAM<sup>+</sup> cells (initially gated from DAPI-/CD45- and single cell  
1042 populations), from single-cell suspensions of collagenase-digested lungs from mock-  
1043 infected and IAV-infected (WSN; 10<sup>6</sup> PFUs, 48 hrs) IFN- $\lambda$  reporter mice or WT 129  
1044 SvEv controls. (C) Flow cytometry plots demonstrating gating scheme of pDCs from the  
1045 lungs of the same mice as in (A). From initial gating of DAPI-/CD45<sup>+</sup> and single cells,  
1046 pDCs were gated as CD11c<sup>+</sup>/CD11b<sup>-</sup>, B220<sup>+</sup>/PDCA1<sup>+</sup>, from which GFP expression  
1047 was assessed. Graphs on the right represent SEM of %GFP<sup>+</sup> pDCs, and number of  
1048 pDCs from each cohort. Data are pooled from three independent experiments. (D)  
1049 qPCR analysis of IFN- $\lambda$  and IFN- $\alpha$  transcripts in epithelial cells and pDCs that were  
1050 FACS-sorted from the single cell suspension of collagenase-digested lungs from of  
1051 mock-infected and IAV (WSN)-infected WT 129 SvEv mice (10<sup>5</sup> PFUs, 48 hrs). Data are  
1052 representative of two independent experiments. (E) Formalin fixed lung tissue sections  
1053 from mock-infected or IAV-infected (10<sup>6</sup> PFUs WSN) IFN- $\lambda$  reporter mice, harvested at  
1054 the indicated time points, were stained with IFN- $\lambda$  oligonucleotide probes to detect *ifnl*  
1055 RNA transcripts. Data are representative of two independent experiments.

1056

1057 **Figure 11. Minimal IFN- $\lambda$  expression by epithelial cells during IAV infections is not**  
1058 **due to a NS1-mediated inhibition**

1059 Representative flow cytometry plots showing GFP expression from (A) epithelial cells  
1060 (gated from DAPI-/CD45-/EPCAM<sup>+</sup>) and (B) pDCs (gated from DAPI-

1061 /CD45+/CD11c+/CD11b-/B220+/PDCA1+) from wildtype 129 SvEv mice and IFN- $\lambda$   
1062 reporter mice mock-infected or infected with  $10^4$  PFUs of either IAV (PR8) or IAV $\Delta$ NS1  
1063 (PR8 $\Delta$ NS1) for 48 hrs. (C) SEM of %GFP epithelial cells and pDCs from each cohort.

1064

1065 **Figure 12. The hematopoietic compartment is the source of the bulk of IFN- $\lambda$**   
1066 **protein produced during IAV infection.**

1067 Bone marrow chimera mice, generated by reconstituting lethally irradiated wildtype  
1068 C57BL6/J mice with bone marrow from either wildtype C57BL6/J mice or *ifnl*<sup>-/-</sup> mice,  
1069 were infected with  $10^5$  PFUs IAV (WSN) for 48 hrs, at which point BAL samples were  
1070 harvested and assayed for IFN- $\lambda$  protein by ELISA. The graph represents the mean and  
1071 SEM of IFN- $\lambda$  protein levels measured from each cohort. Data were pooled from two  
1072 independent experiments

1073

1074 **Figure 13. Depletion of pDCs during IAV infections in vivo results in significant**  
1075 **reduction of both Type I and Type III IFNs**

1076 (A) Representative flow cytometry plots show pDC populations in the spleen and blood  
1077 of IAV-infected mice ( $10^6$  PFUs WSN strain; 24 hrs post-infection) that were treated with  
1078 the pDC-depleting antibody (anti-PDCA1) or the Rat IgG isotype 24 hours and 48 hours  
1079 prior to IAV infection. Graphs on the right show mean percentages, and SEM, of pDCs  
1080 in the spleen and blood of each indicated cohort. (B) BALs were harvested 24 hours  
1081 post-IAV infection for IFN- $\lambda$  protein measurements. Graphs represent data from two  
1082 independent experiments

1083

1084 **Figure 14. IFN- $\lambda$  induction by NDV is MAVS-dependent**

1085 (A) IFN- $\lambda$  and (B) IFN- $\alpha$  protein levels were measured by ELISA in BALs of mock-  
1086 infected or NDV-infected (24 hrs,  $10^7$  PFUs) WT and MAVS<sup>-/-</sup> mice on the C57BL/6  
1087 strain background. Differences in IFN- $\lambda$  levels between WT and MAVS<sup>-/-</sup> mice were  
1088 statistically significant as determined by student t test (P = 0.0474). No IFN- $\alpha$  protein  
1089 was detectable in mock-infected or NDV-infected MAVS<sup>-/-</sup> animals. Data were pooled  
1090 from two independent experiments

1091

1092 **Figure 15. Contribution of MAVS and MyD88 signaling in IFN- $\lambda$  induction during**  
1093 **IAV infections is dependent on IAV strain**

1094 (A) IFN- $\lambda$  protein levels were measured by ELISA from BALs of IAV-infected ( $10^6$  PFUs  
1095 PR8) wildtype C57BL/6J mice or MAVS<sup>-/-</sup> mice at the indicated time points. (B) IFN- $\lambda$   
1096 protein levels measured by ELISA from BALs of IAV-infected ( $10^5$  PFUs WSN) wildtype  
1097 C57BL/6J mice, MyD88<sup>-/-</sup>, or MAVS<sup>-/-</sup> mice at 48 hours post-infection. Graphs represent  
1098 the mean and SEM of IFN- $\lambda$  protein measured from the BALs of each cohort. Data from  
1099 each figure were pooled from two independent experiments.

1100

1101 **Figure 16. Murine tracheal epithelial cells produce IFN- $\lambda$  in response to WSN but**  
1102 **not to PR8 infection**

1103 Murine tracheal epithelial cultures were infected apically, at an MOI of 1, with NDV,  
1104 WSN, PR8 or UV-inactivated PR8 for 24 hours. Supernatants were then assayed by  
1105 ELISA for IFN- $\lambda$  protein.

1106

1107 **Figure 17. IFN- $\lambda$  production by pDCs during IAV infection is dependent on type I**  
1108 **IFN signaling**

1109 (A) Flow cytometry plots showing GFP expression in pDCs (DAPI-  
1110 /CD45+/CD11c+/CD11b<sup>-</sup>/B220<sup>+</sup>/PDCA1<sup>+</sup>) from the lungs of IFNAR<sup>+/+</sup> or IFNAR<sup>-/-</sup> IFN- $\lambda$   
1111 reporter mice, or 129 SvEv mice, mock-infected or IAV-infected (PR8 10<sup>6</sup> PFUs, for 72  
1112 hrs). The graph on the right represents mean and SEM of %GFP<sup>+</sup> cells from each  
1113 cohort. (B) Supernatants from mock-infected or IAV-infected (WSN; MOI=1) WT and  
1114 IFNAR<sup>-/-</sup> FLT3L-cultured bone-marrow derived pDCs were collected 24 hours post-  
1115 infection, and assayed for IFN- $\lambda$  protein by ELISA. (C) qPCR measurements comparing  
1116 basal levels of IRF7 mRNA expression between WT and IFNAR<sup>-/-</sup> bone-marrow derived  
1117 pDCs. Data were pooled from two independent experiments.

1118

1119 **Figure 18. IFN- $\lambda$  production during NDV infection is type I IFN-independent**

1120 GFP expression was assayed by flow cytometry of cells obtained from collagenase-  
1121 digested lungs of 129 SvEv WT and IFNAR<sup>-/-</sup> IFN- $\lambda$  reporter mice which were mock-  
1122 infected, or infected intranasally with NDV for 24 hrs. Epithelial cells were defined as  
1123 CD45<sup>-</sup>, EPCAM<sup>+</sup>. WT 129SvEV mice were included as controls for GFP expression,  
1124 gating in the same manner. No significant differences in GFP expression were seen  
1125 between IFN- $\lambda$  reporter animals on the WT or IFNAR<sup>-/-</sup> backgrounds.

1126

1127 **Supplemental Figure 1. Viral loads are equivalent in WT and reporter mice**

1128 Cohorts of 6-10 week old WT 129 SvEv mice or strain-matched IFN- $\lambda$  reporter mice  
1129 were infected with 10<sup>2</sup> PFUs of IAV (WSN). Viral titers from the lungs were assayed by

1130 immunofocus assay from lung homogenates collected at 72 hrs post-infection. The  
1131 graph represents SEM of PFUs quantified for each cohort. This is experiment was  
1132 performed twice.

1133

#### 1134 **Supplemental Figure 2. Generation of *ifnl*<sup>-/-</sup> mice**

1135 The mouse genome contains two functional IFN- $\lambda$  genes, the IFN- $\lambda$ 2 and IFN- $\lambda$ 3 genes,  
1136 which are juxtaposed in a head-to-head orientation on chromosome 7. Guidance RNAs  
1137 (gRNAs) were designed to target sequences flanking these genes, and the  
1138 CRISPR/Cas9 technology was used to generate mice lacking both IFN- $\lambda$  genes, to  
1139 create an IFN- $\lambda$ 2/3 knock-out (KO) strain. The selected IFN- $\lambda$ 2/3 KO strain contains  
1140 19,803 base pair deletion (from 28,506,772 to 28,526,525 nucleotide positions; NCBI  
1141 GRCm38.p4) that removed the entire IFN- $\lambda$ 2 and IFN- $\lambda$ 3 genes including their  
1142 promoters and 3'UTR, and replaced these with ATAACTTCGTATAGCATA sequence.

1143



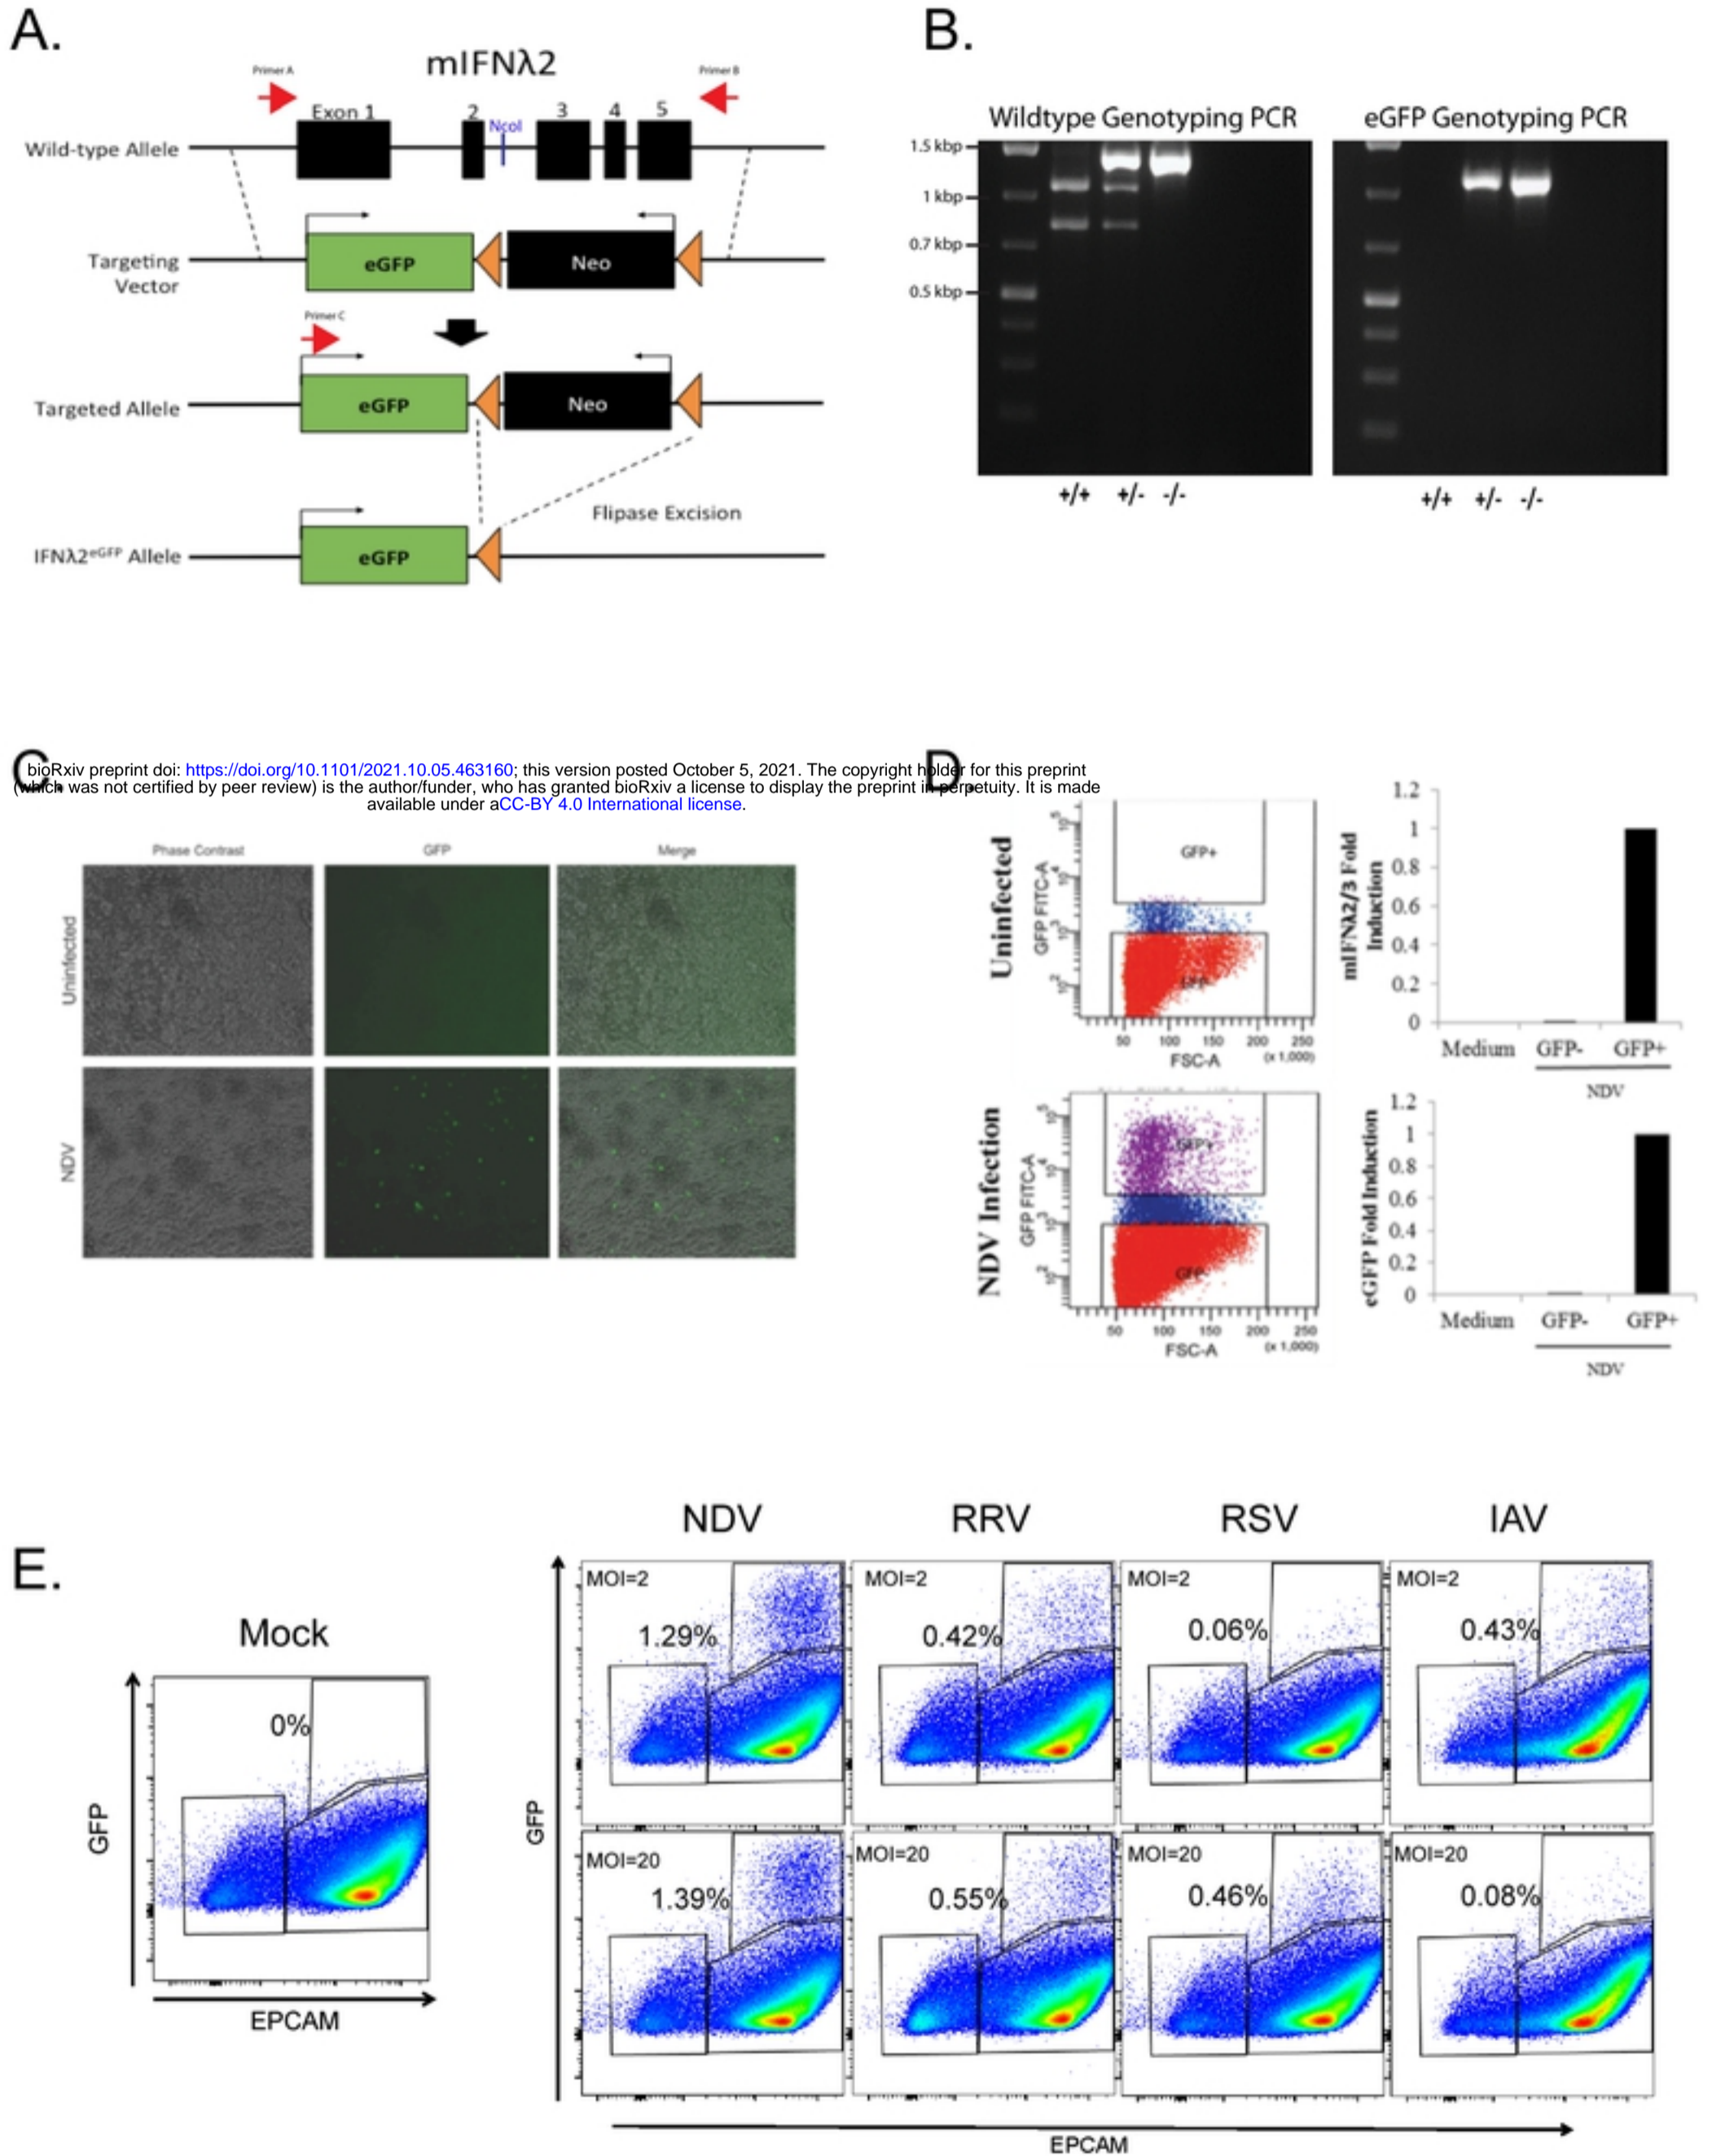

Figure



**A.**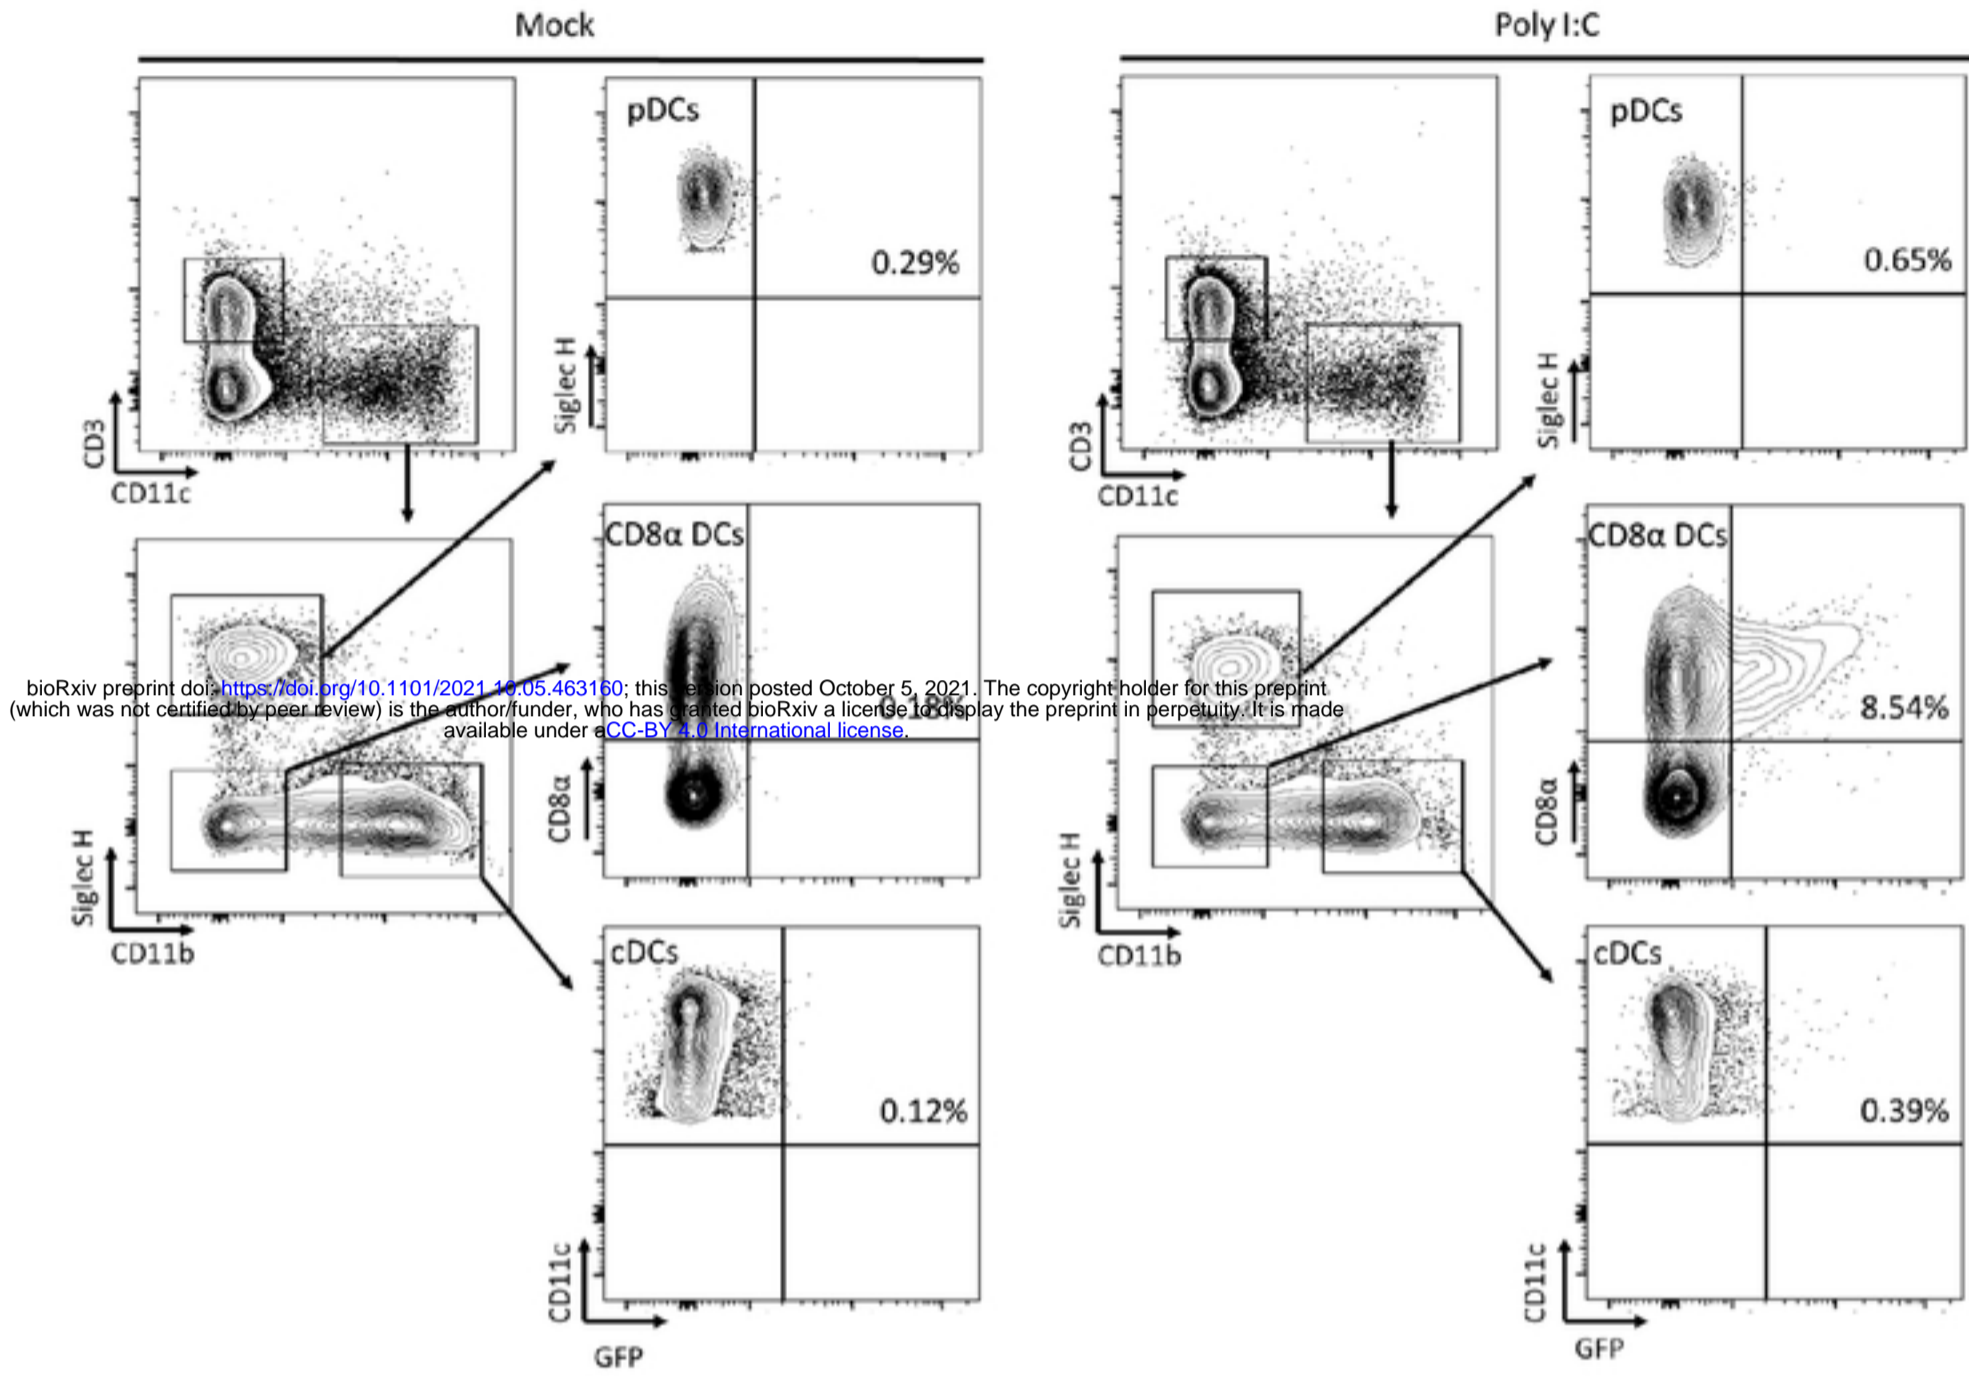**B.**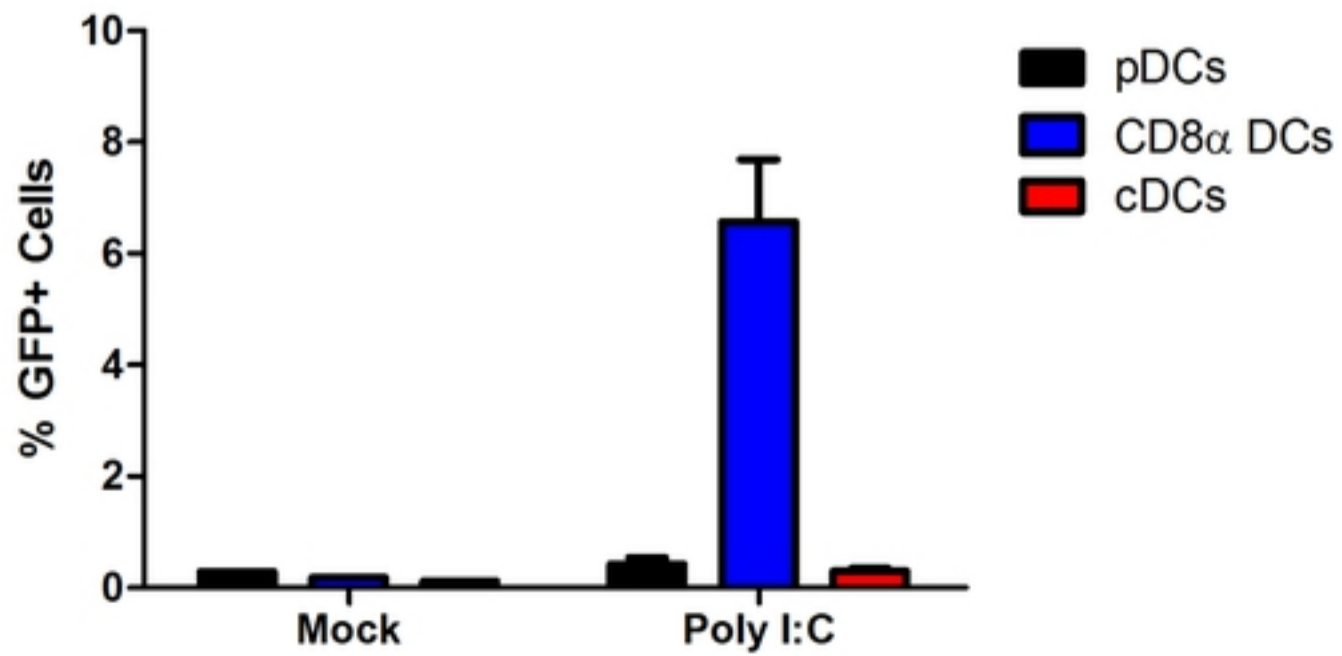

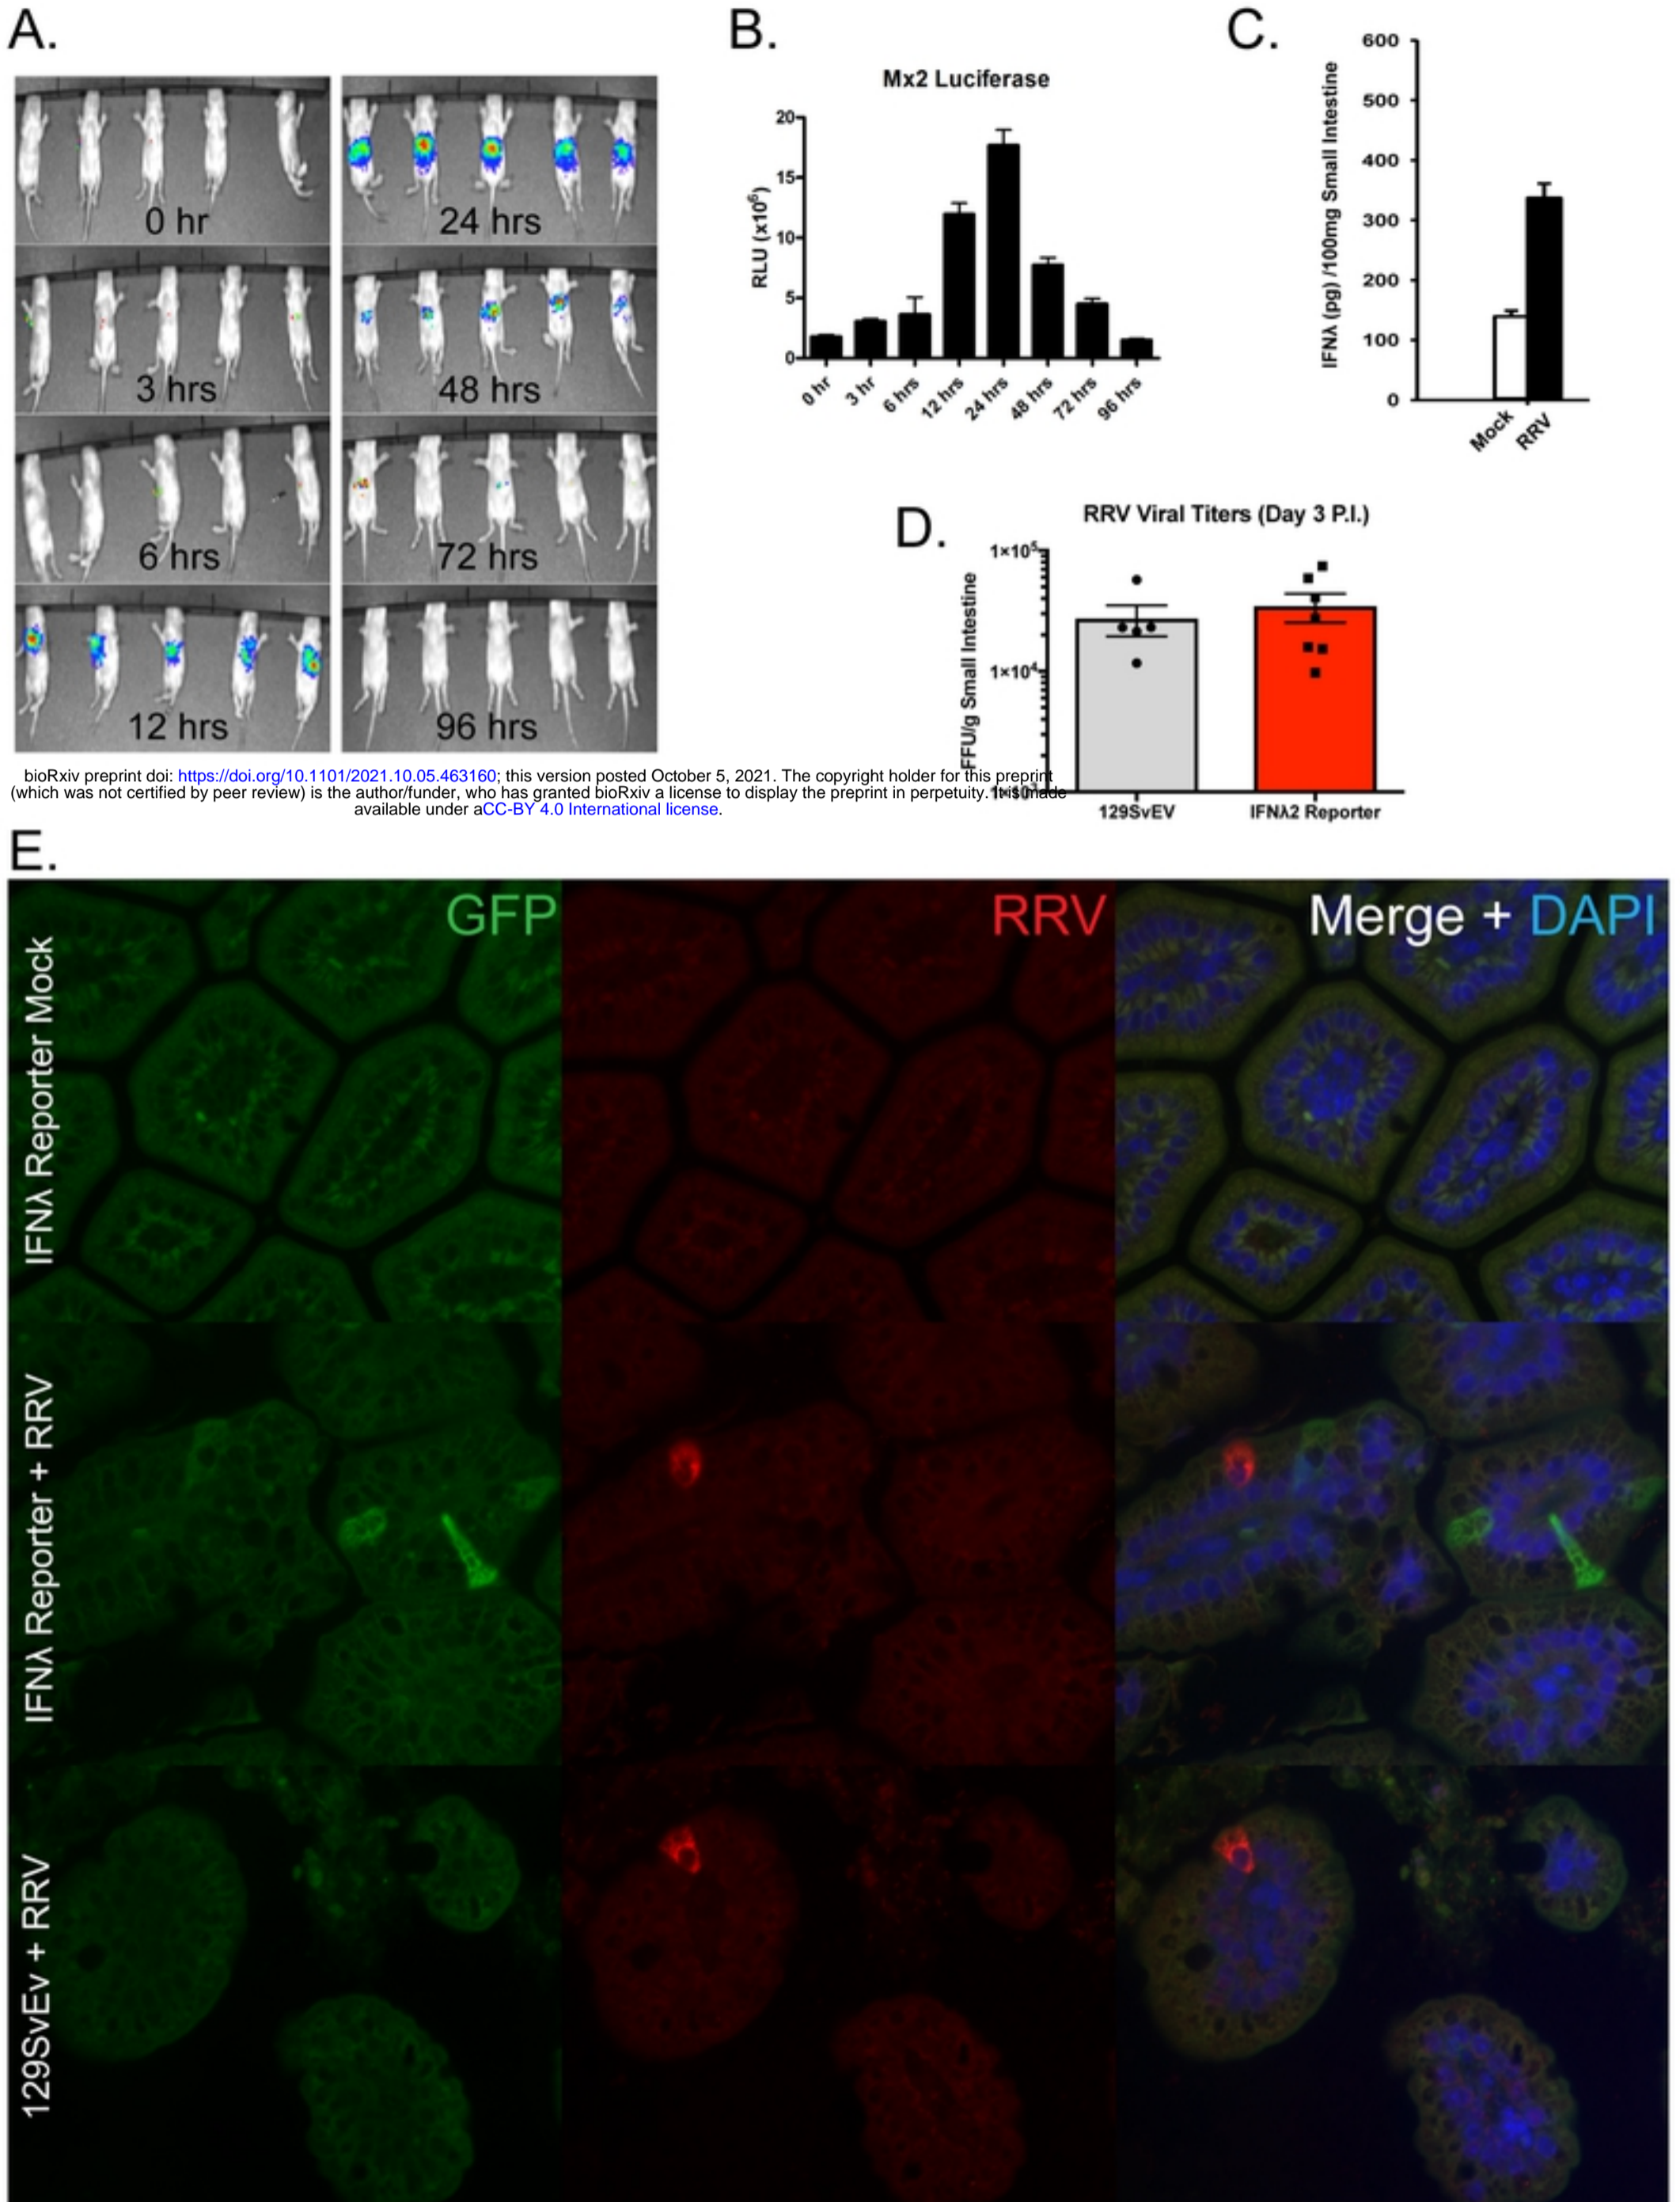



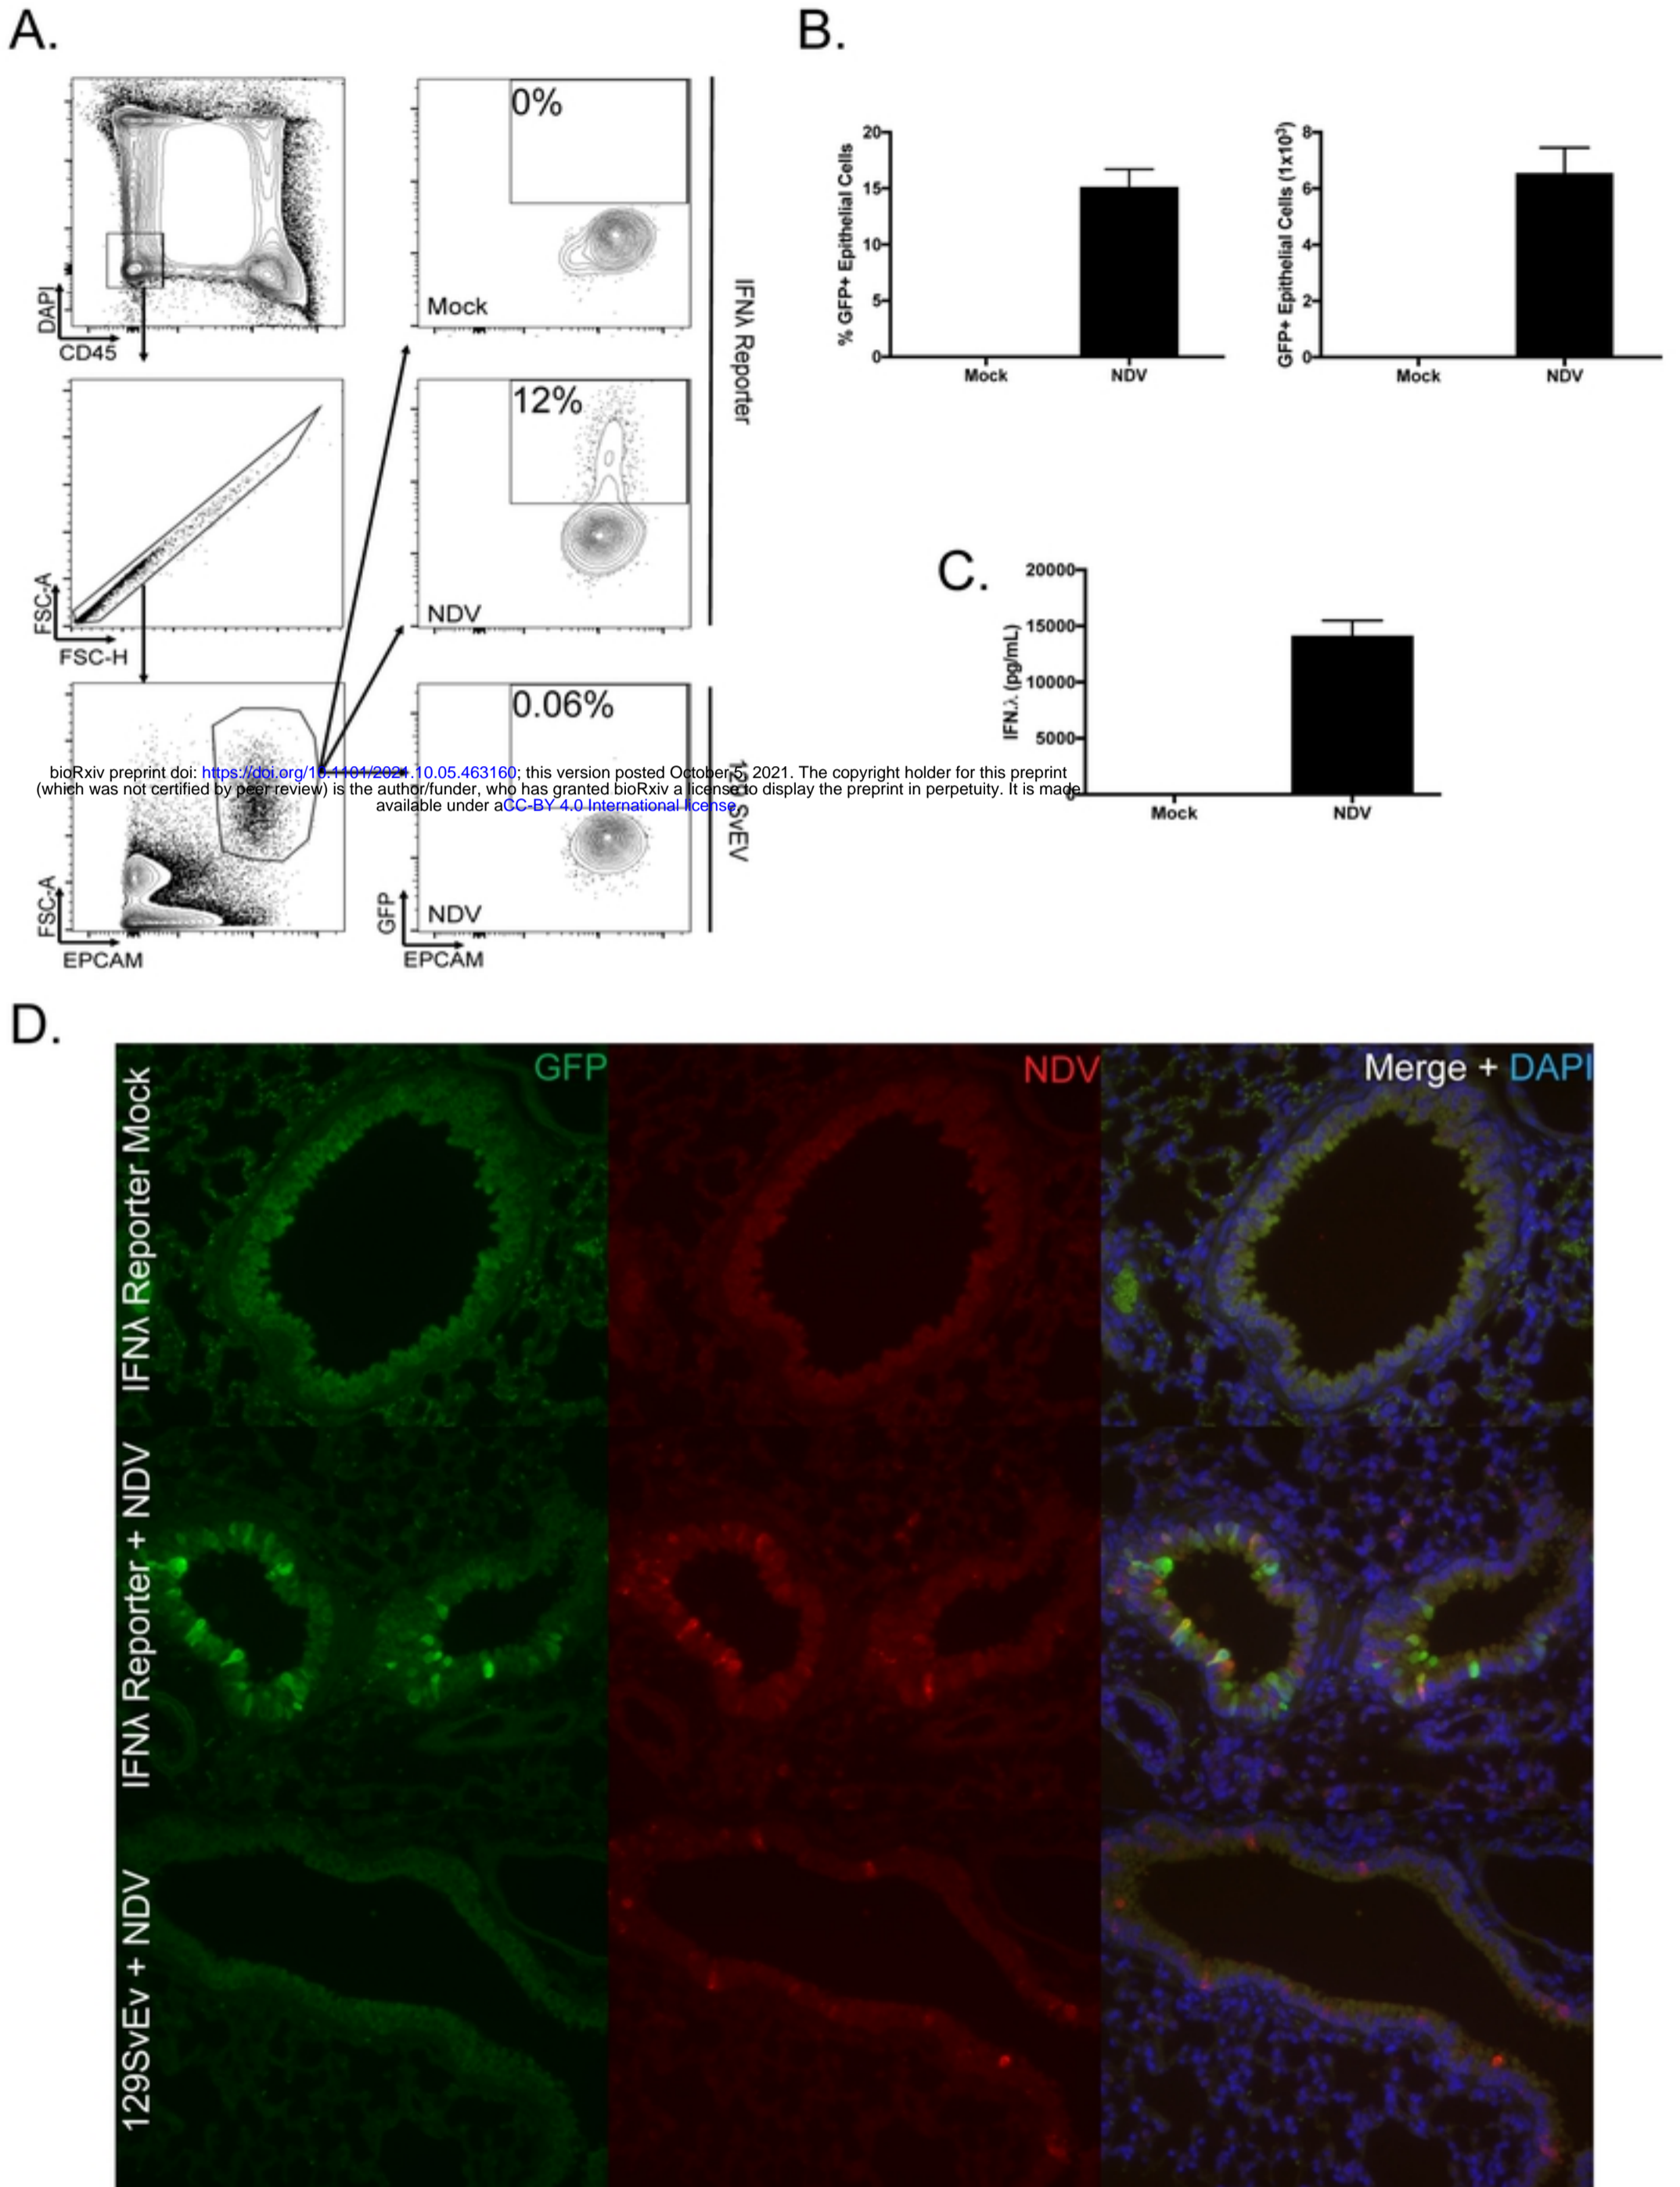

Figure

A.

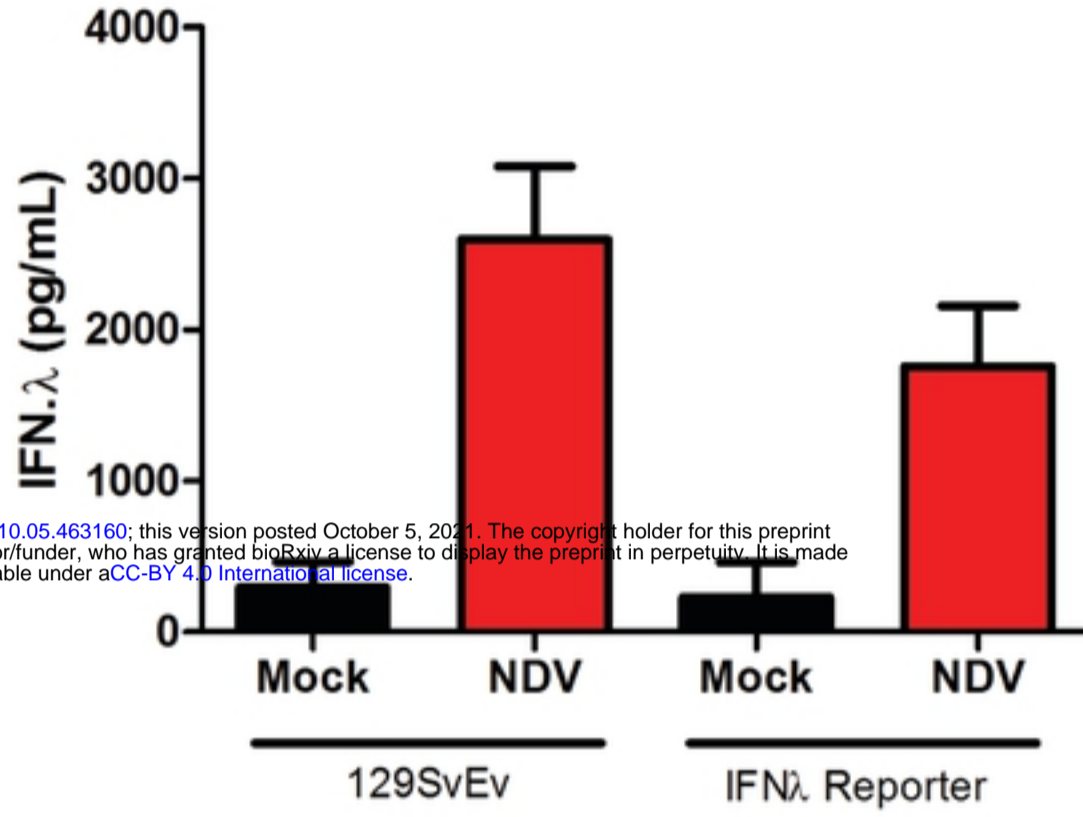

B.

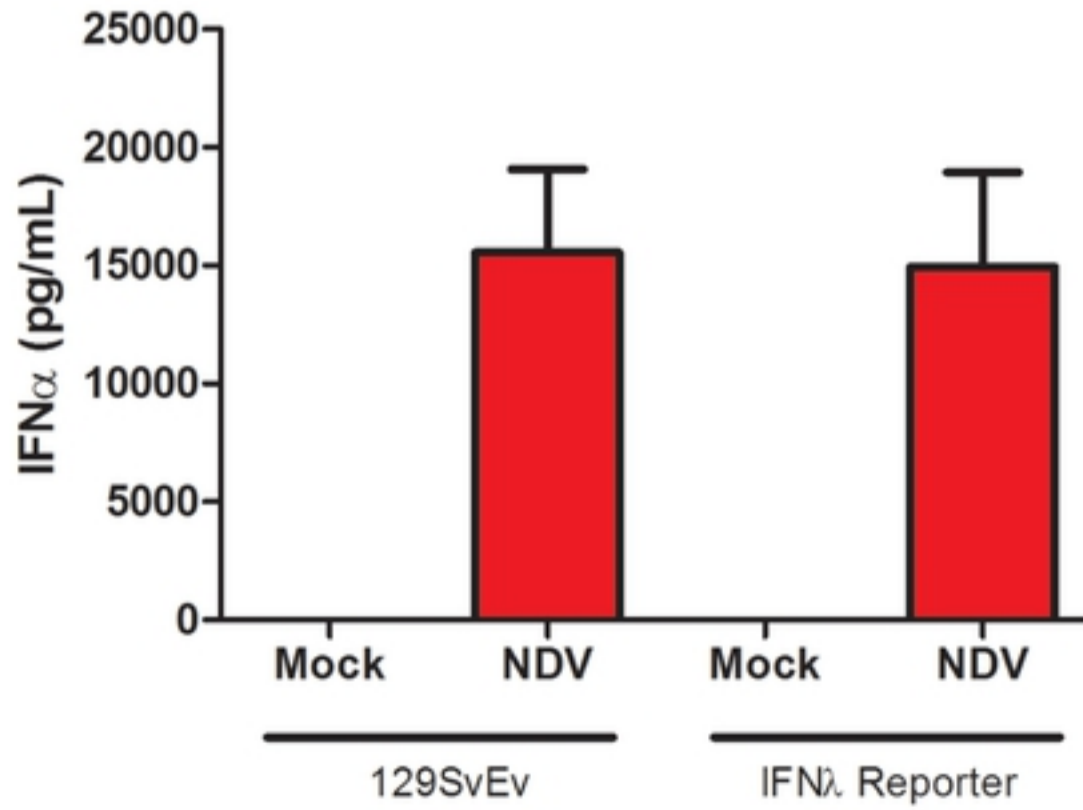

### IFN $\lambda$ Reporter Mock

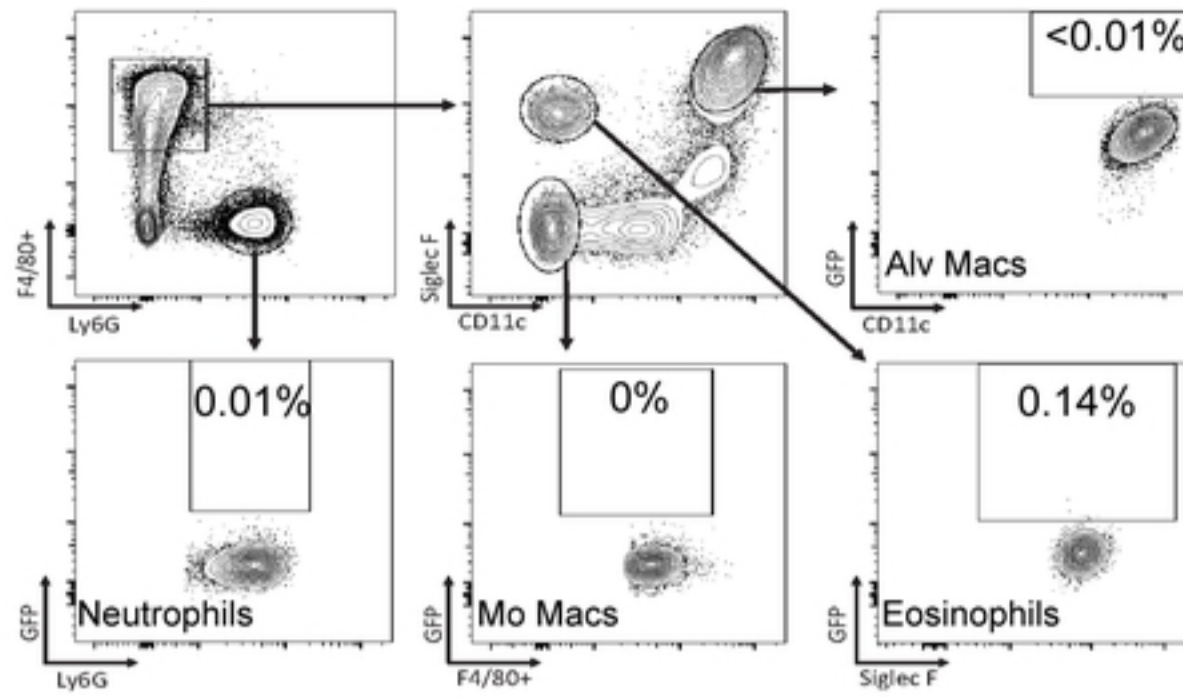

bioRxiv preprint doi: <https://doi.org/10.1101/2021.10.05.463160>; this version posted October 5, 2021. The copyright holder for this preprint (which was not certified by peer review) is the author/funder, who has granted bioRxiv a license to display the preprint in perpetuity. It is made available under aCC-BY 4.0 International license.

### IFN $\lambda$ Reporter + NDV

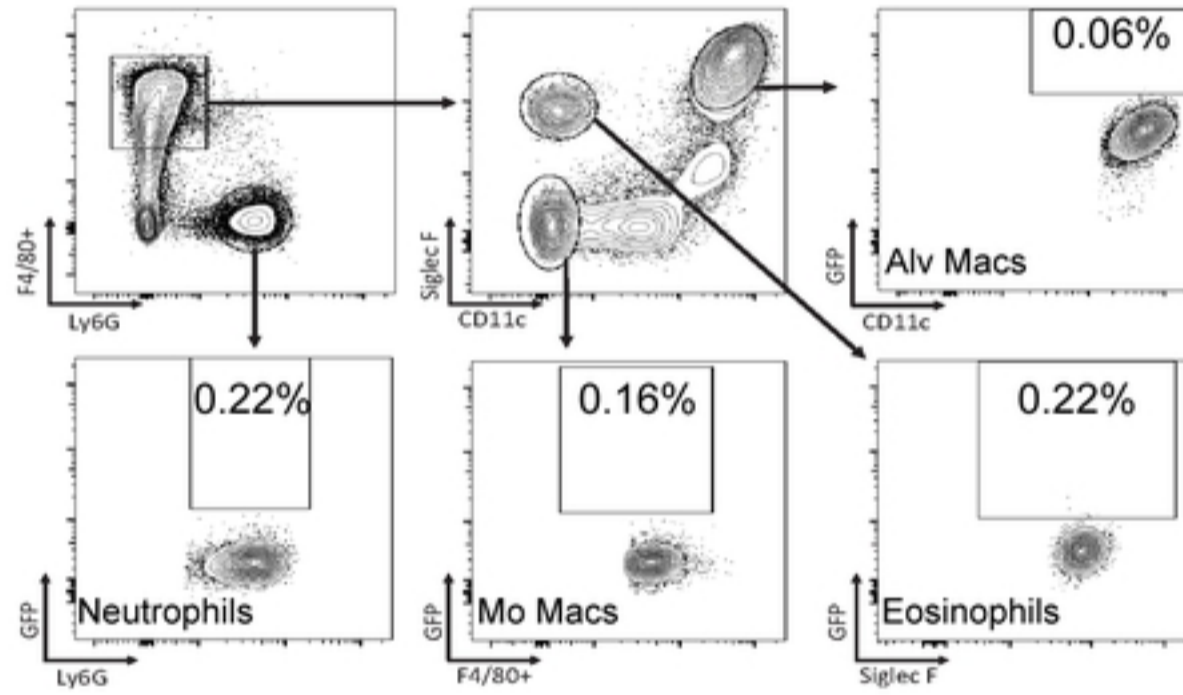

### 129SvEv + NDV

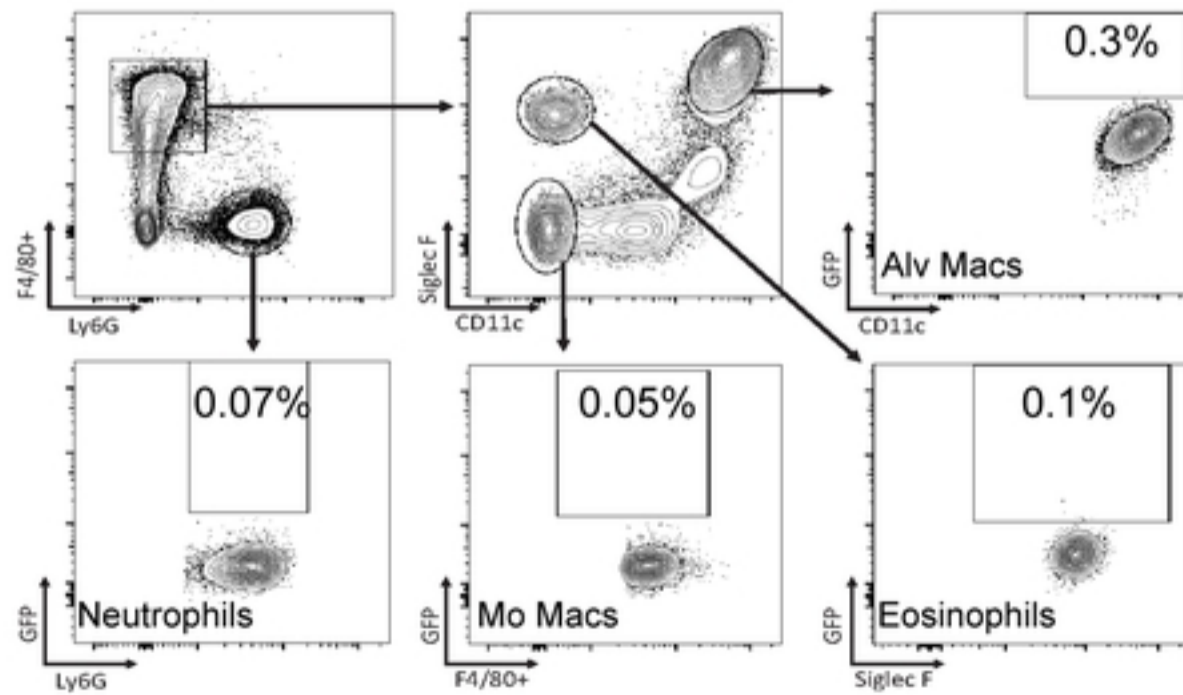



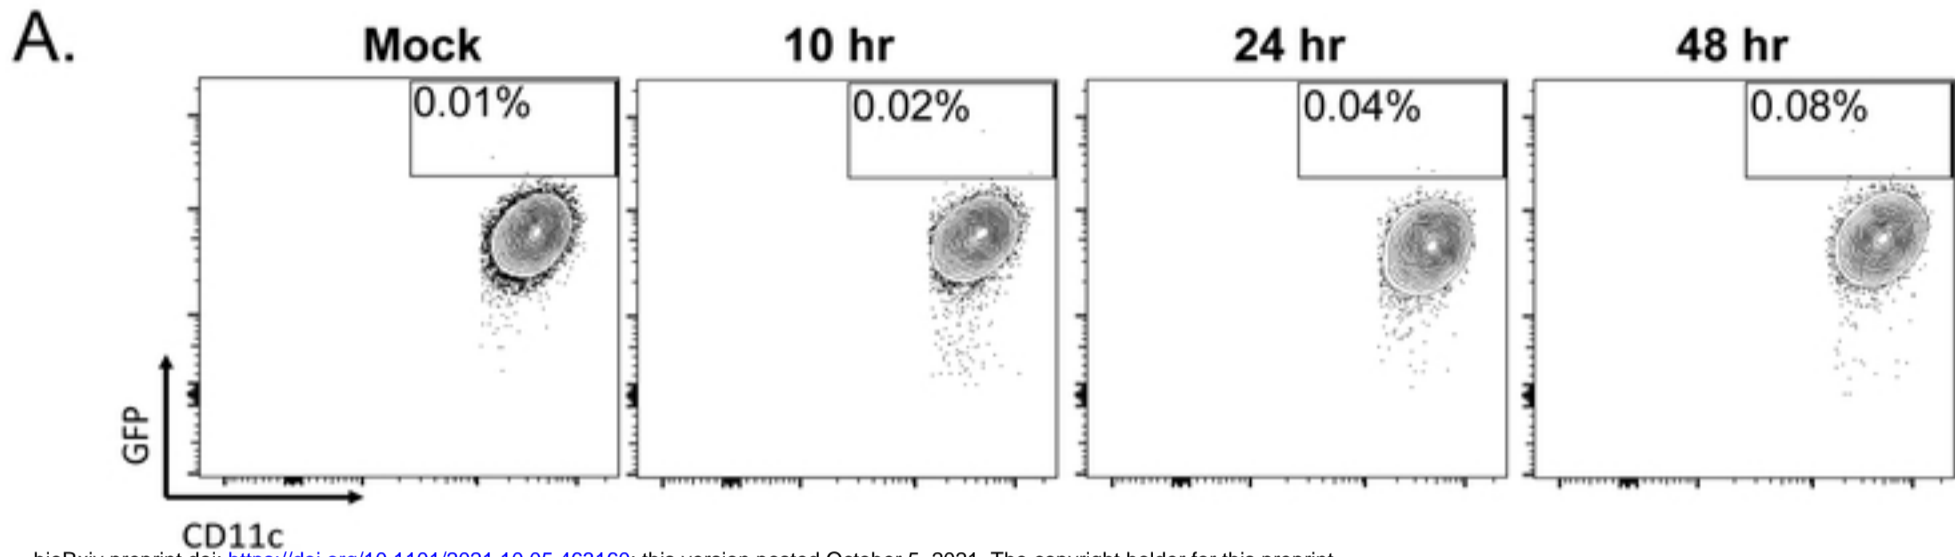

bioRxiv preprint doi: <https://doi.org/10.1101/2021.10.05.463160>; this version posted October 5, 2021. The copyright holder for this preprint (which was not certified by peer review) is the author/funder, who has granted bioRxiv a license to display the preprint in perpetuity. It is made available under aCC-BY 4.0 International license.

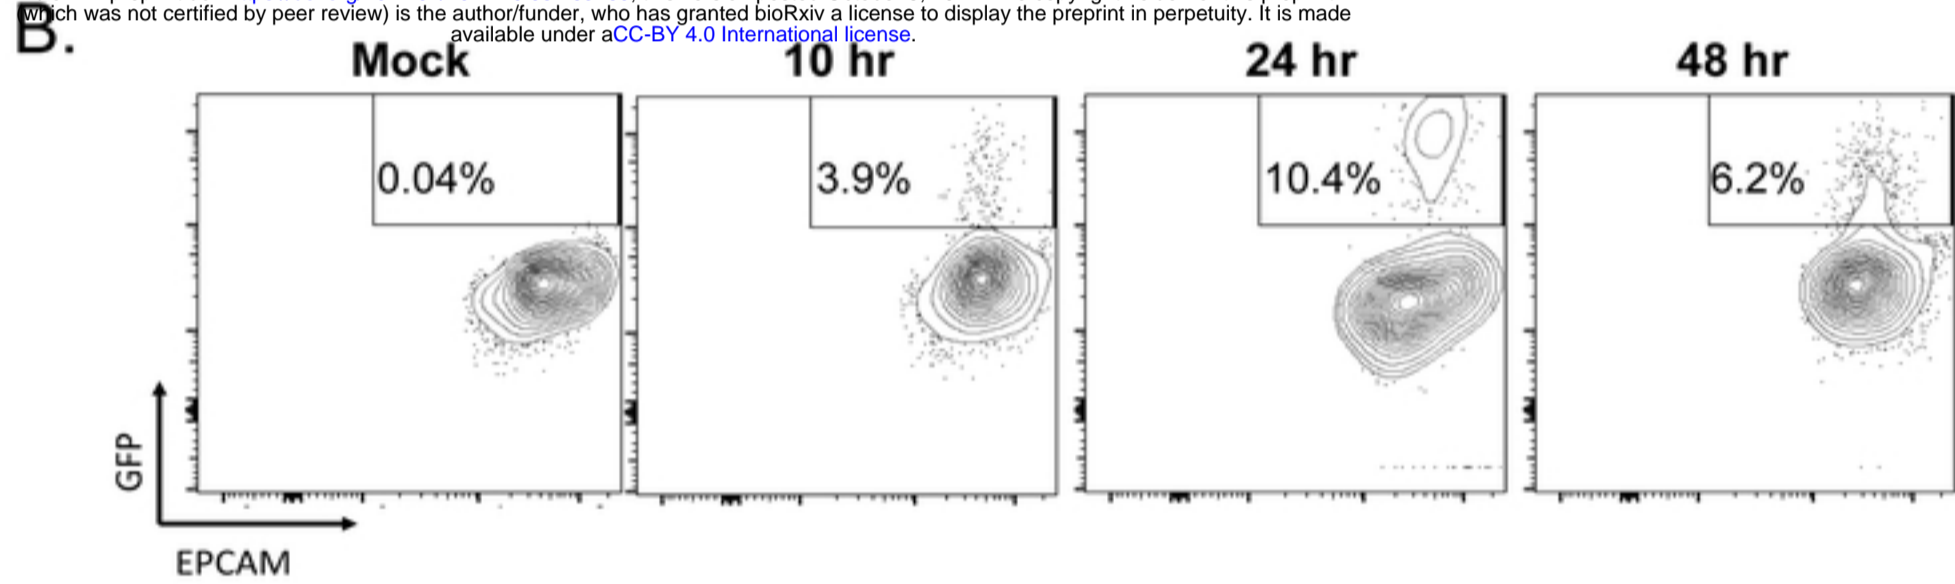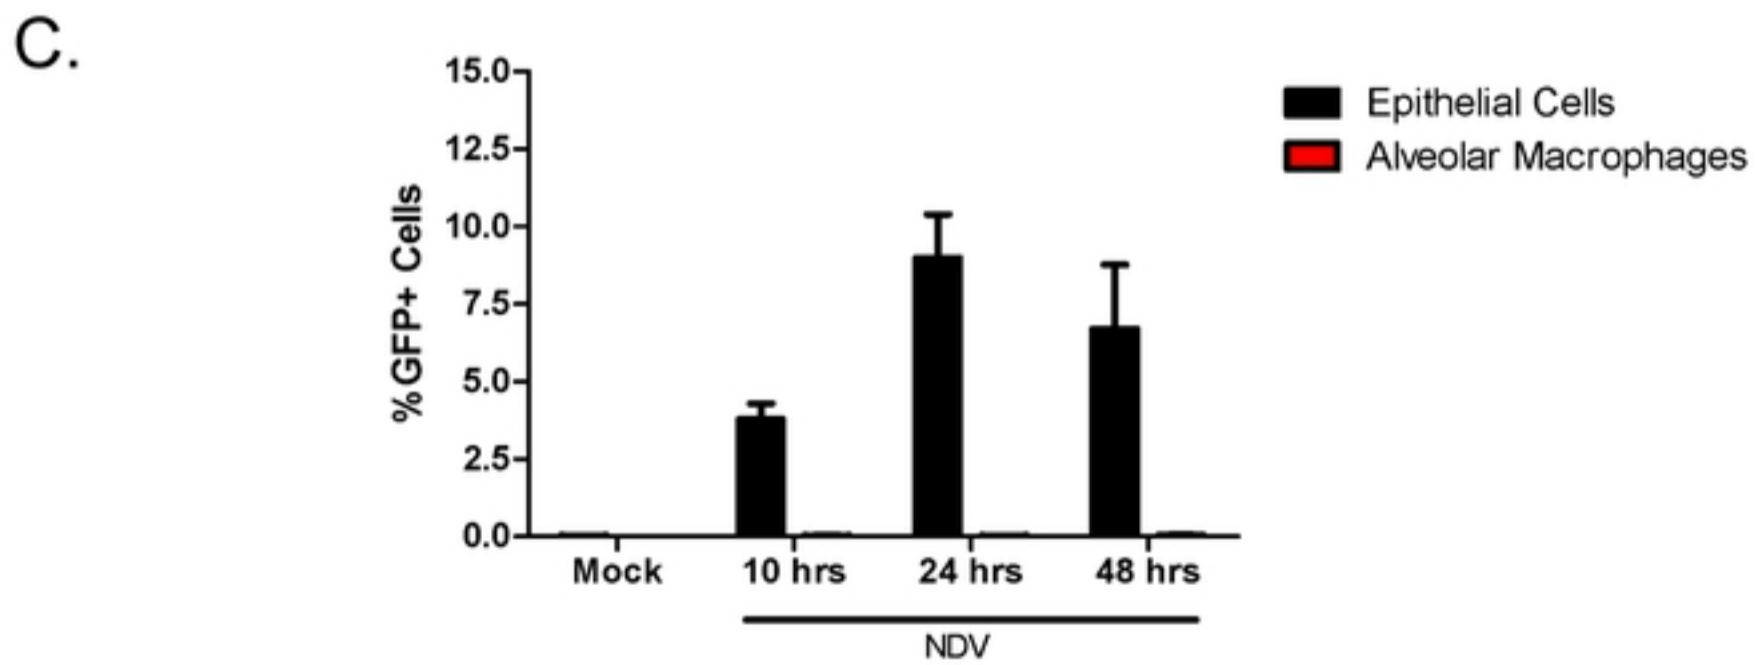

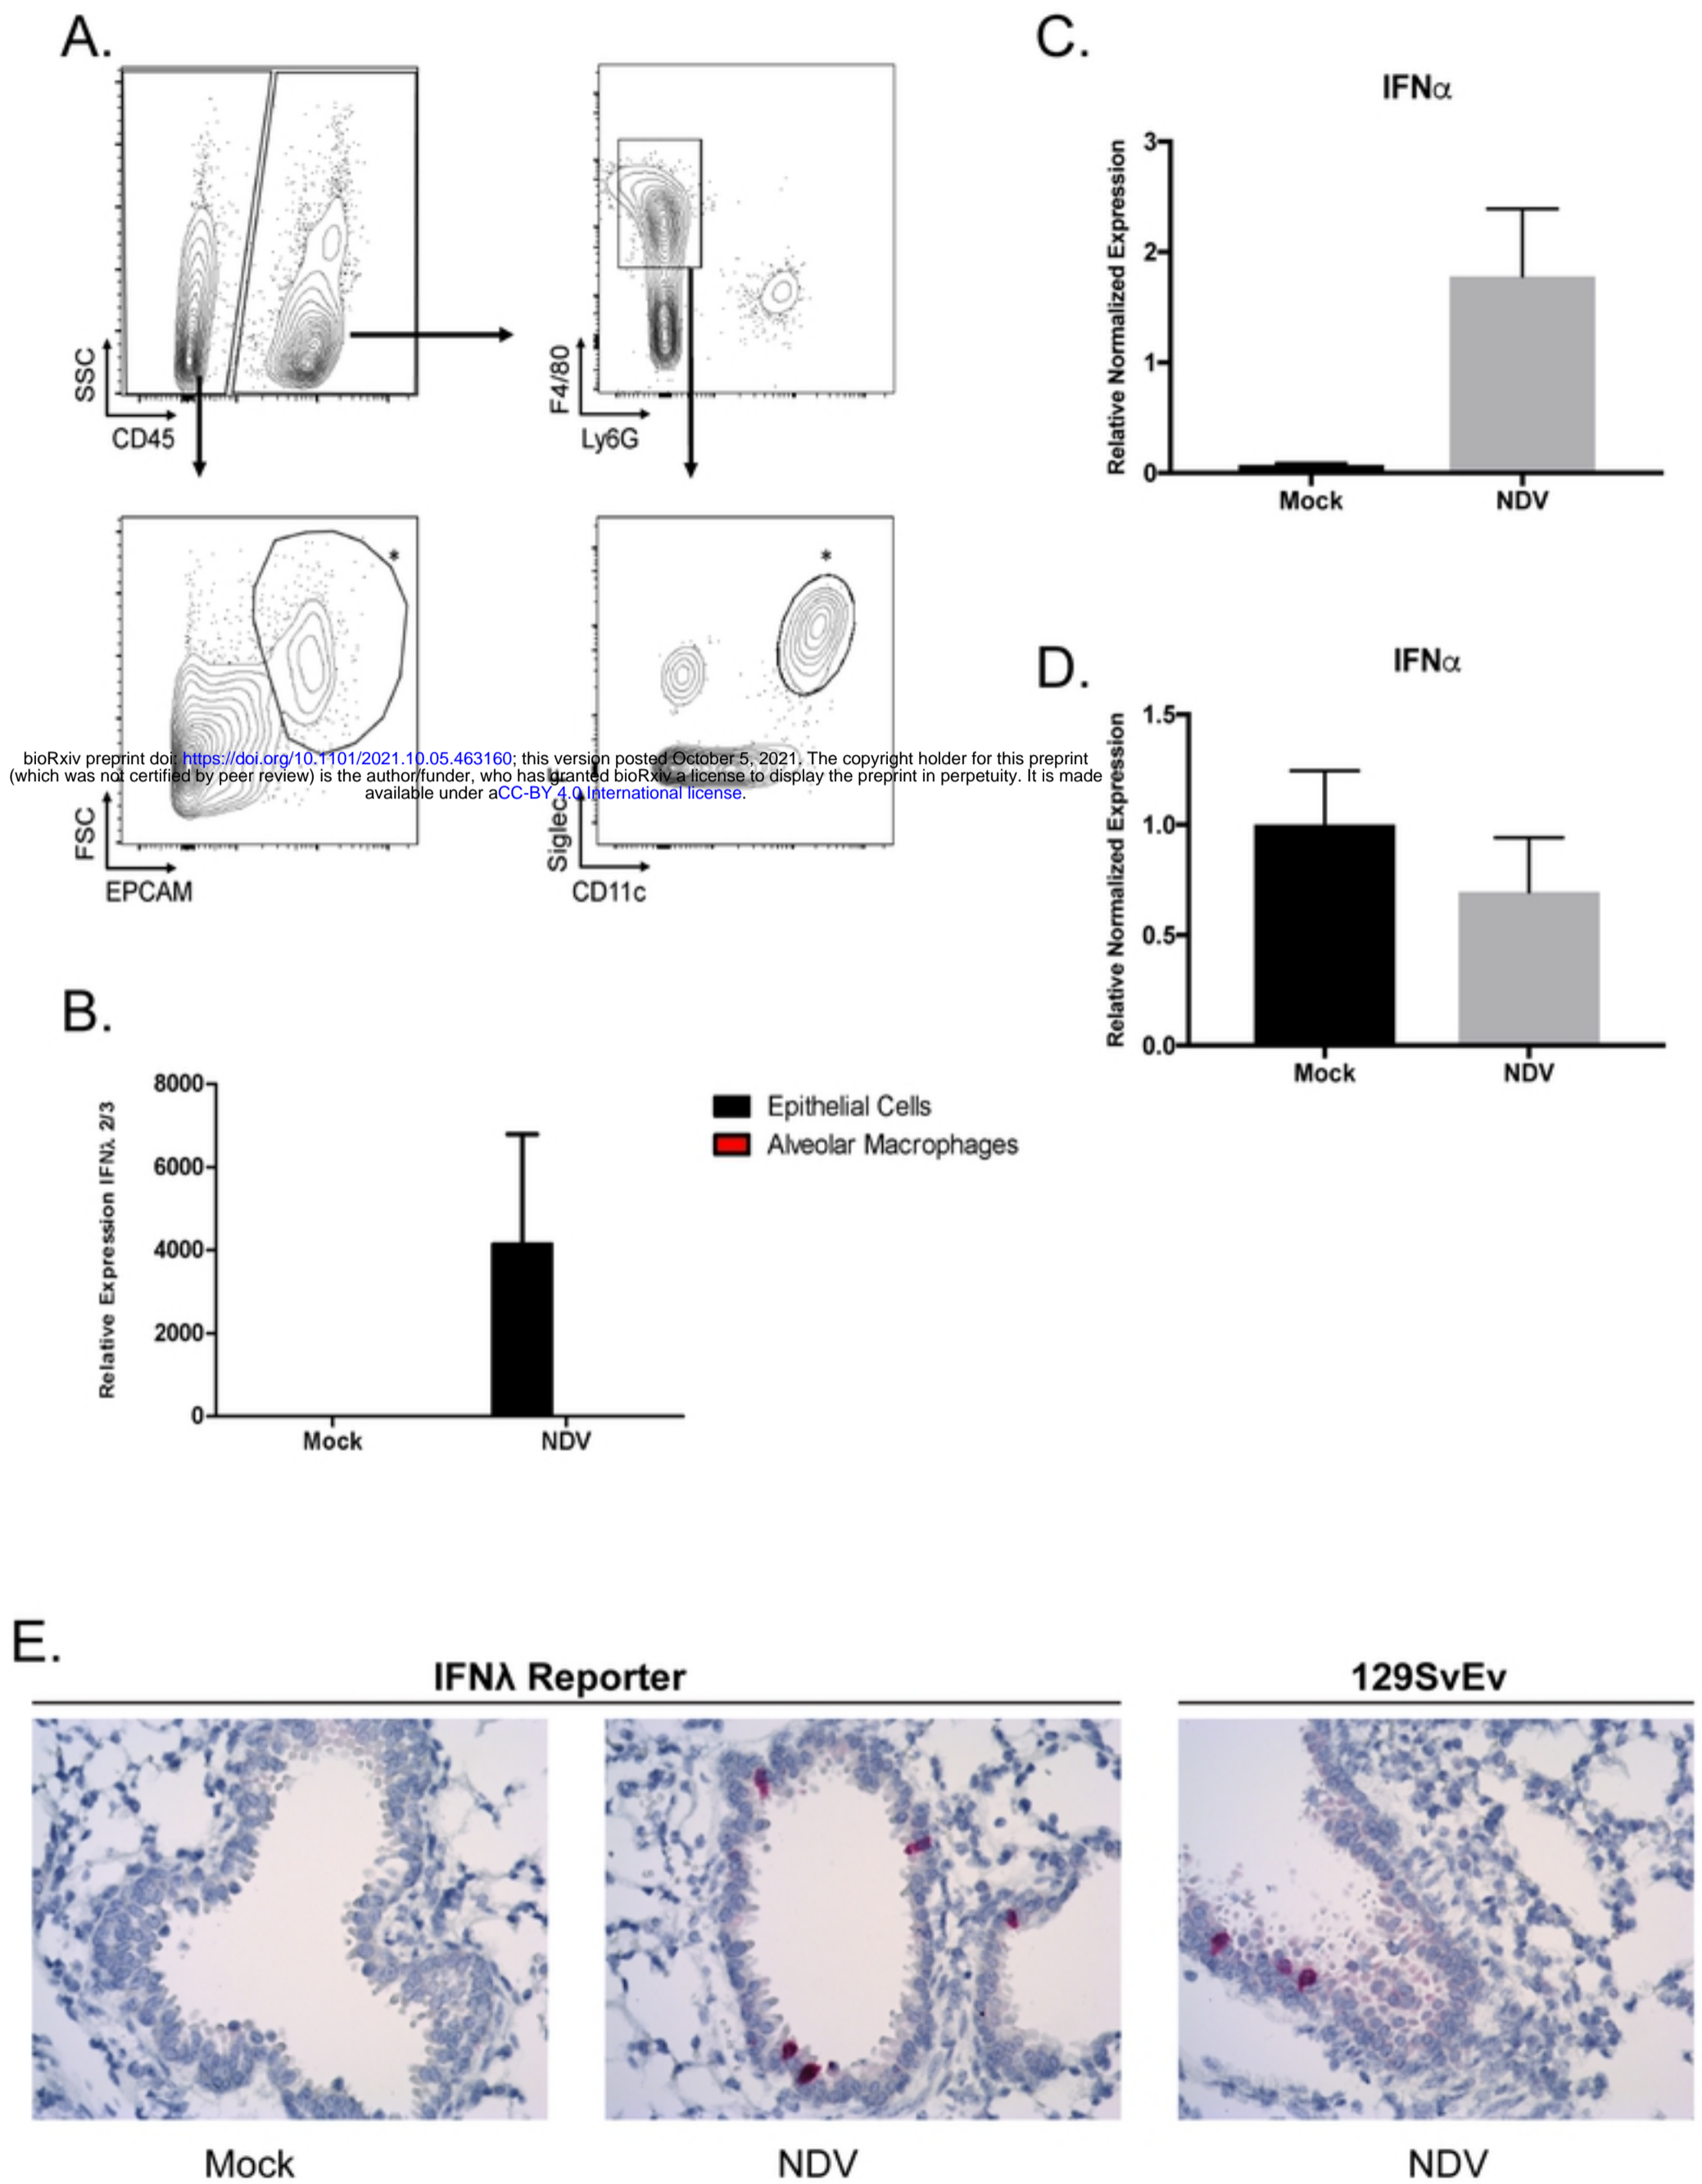

bioRxiv preprint doi: <https://doi.org/10.1101/2021.10.05.463160>; this version posted October 5, 2021. The copyright holder for this preprint (which was not certified by peer review) is the author/funder, who has granted bioRxiv a license to display the preprint in perpetuity. It is made available under aCC-BY 4.0 International license.



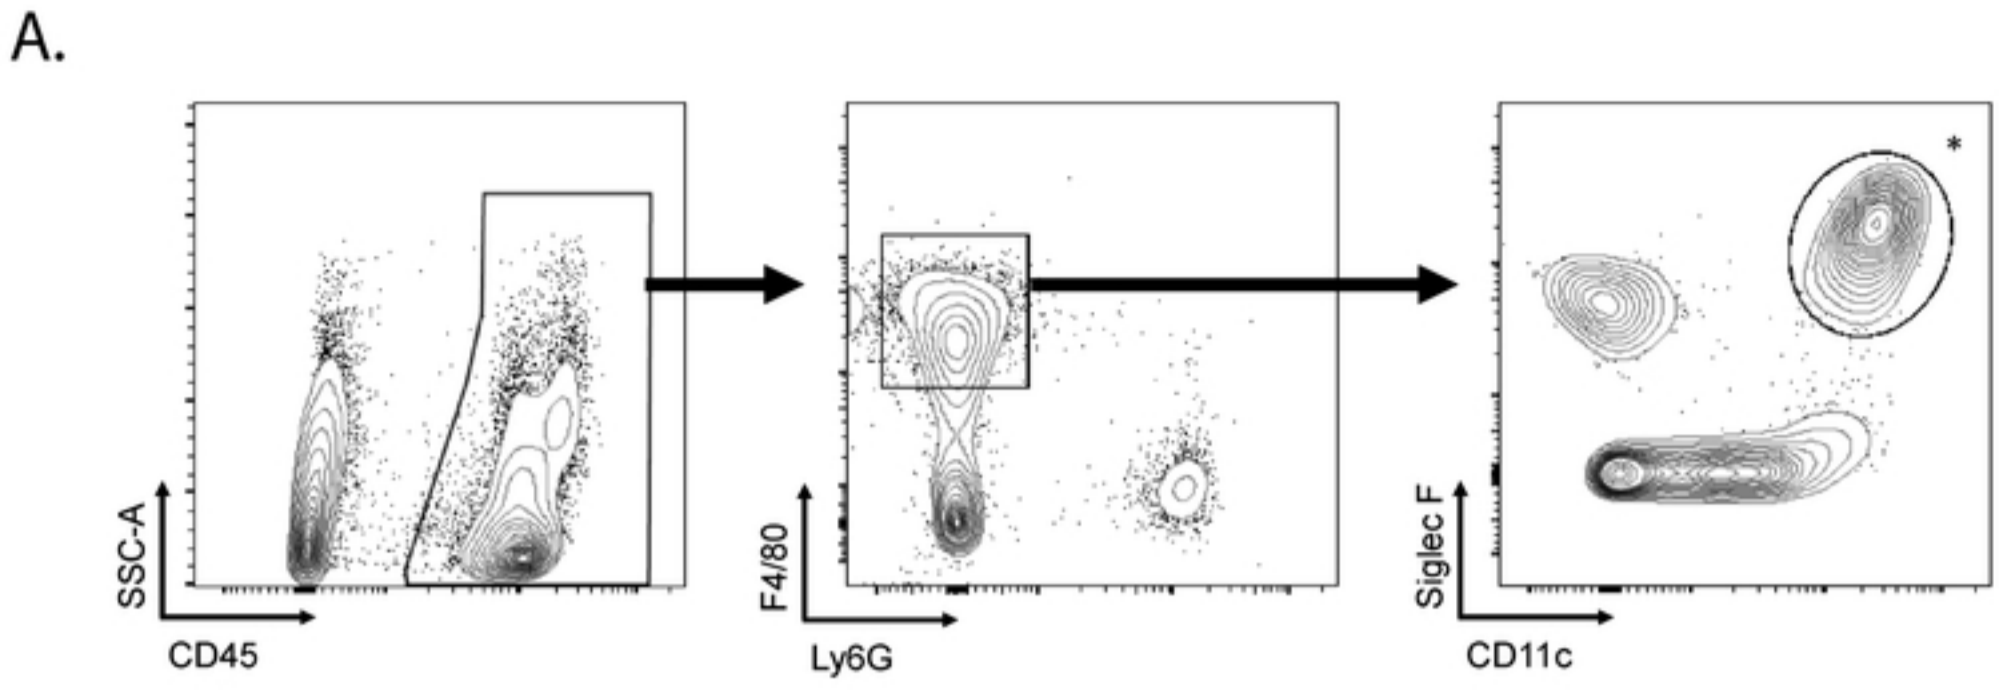

B. bioRxiv preprint doi: <https://doi.org/10.1101/2021.10.05.463160>; this version posted October 5, 2021. The copyright holder for this preprint (which was not certified by peer review) is the author/funder, who has granted bioRxiv a license to display the preprint in perpetuity. It is made available under aCC-BY 4.0 International license.

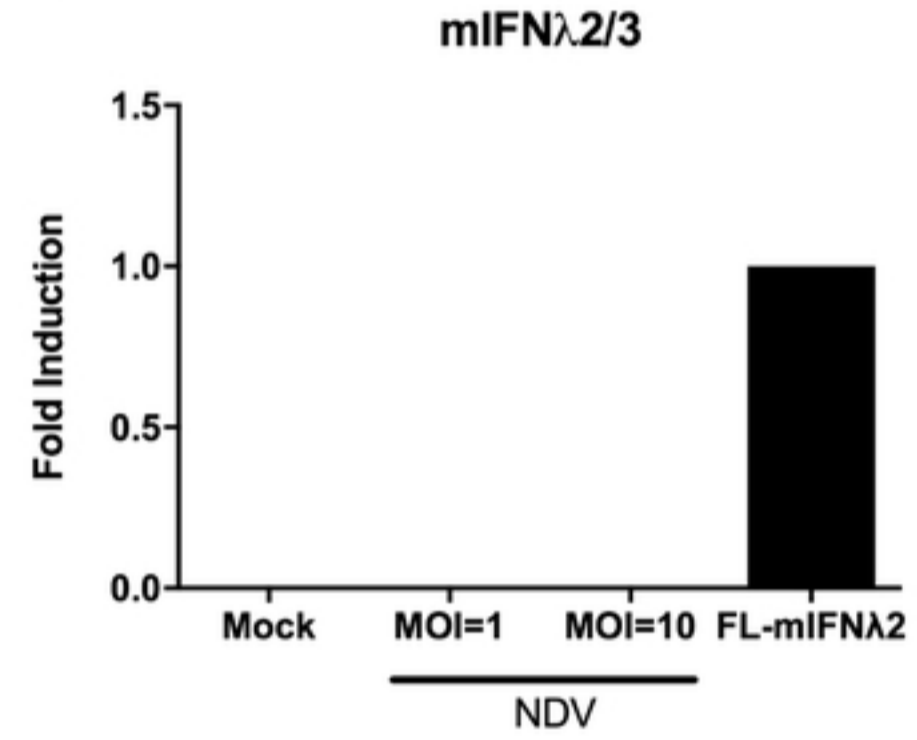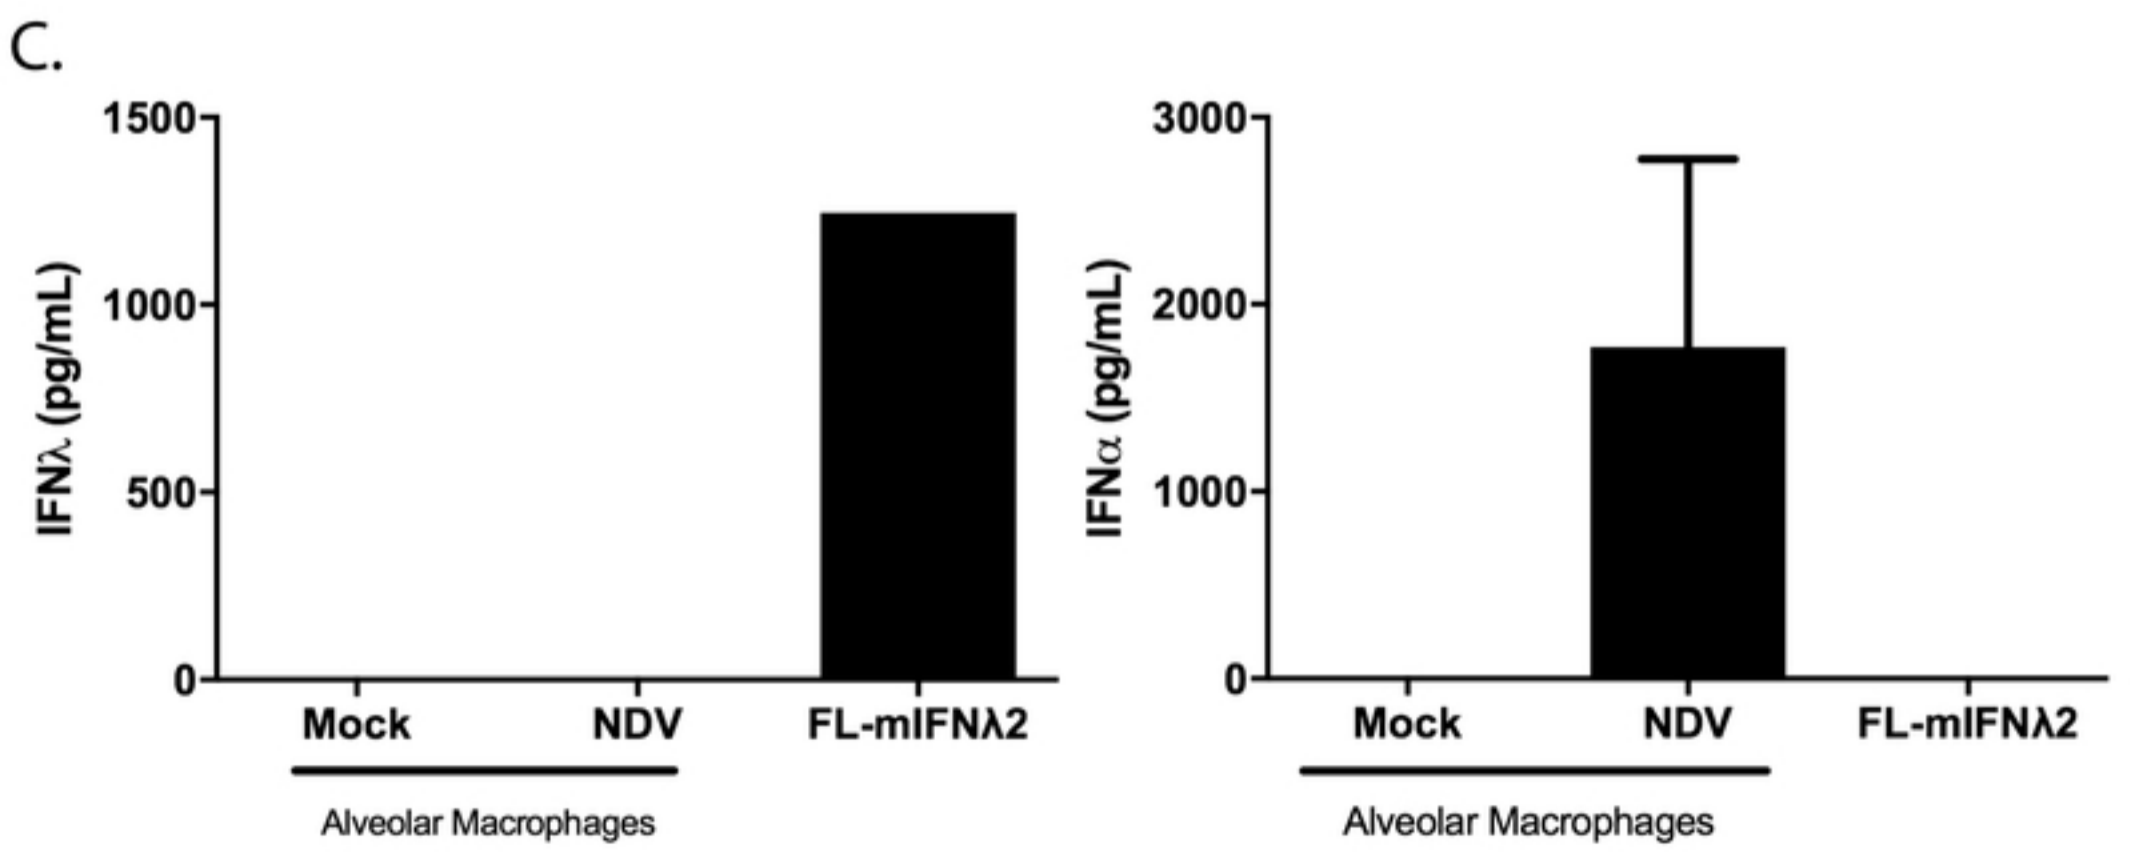

Figure

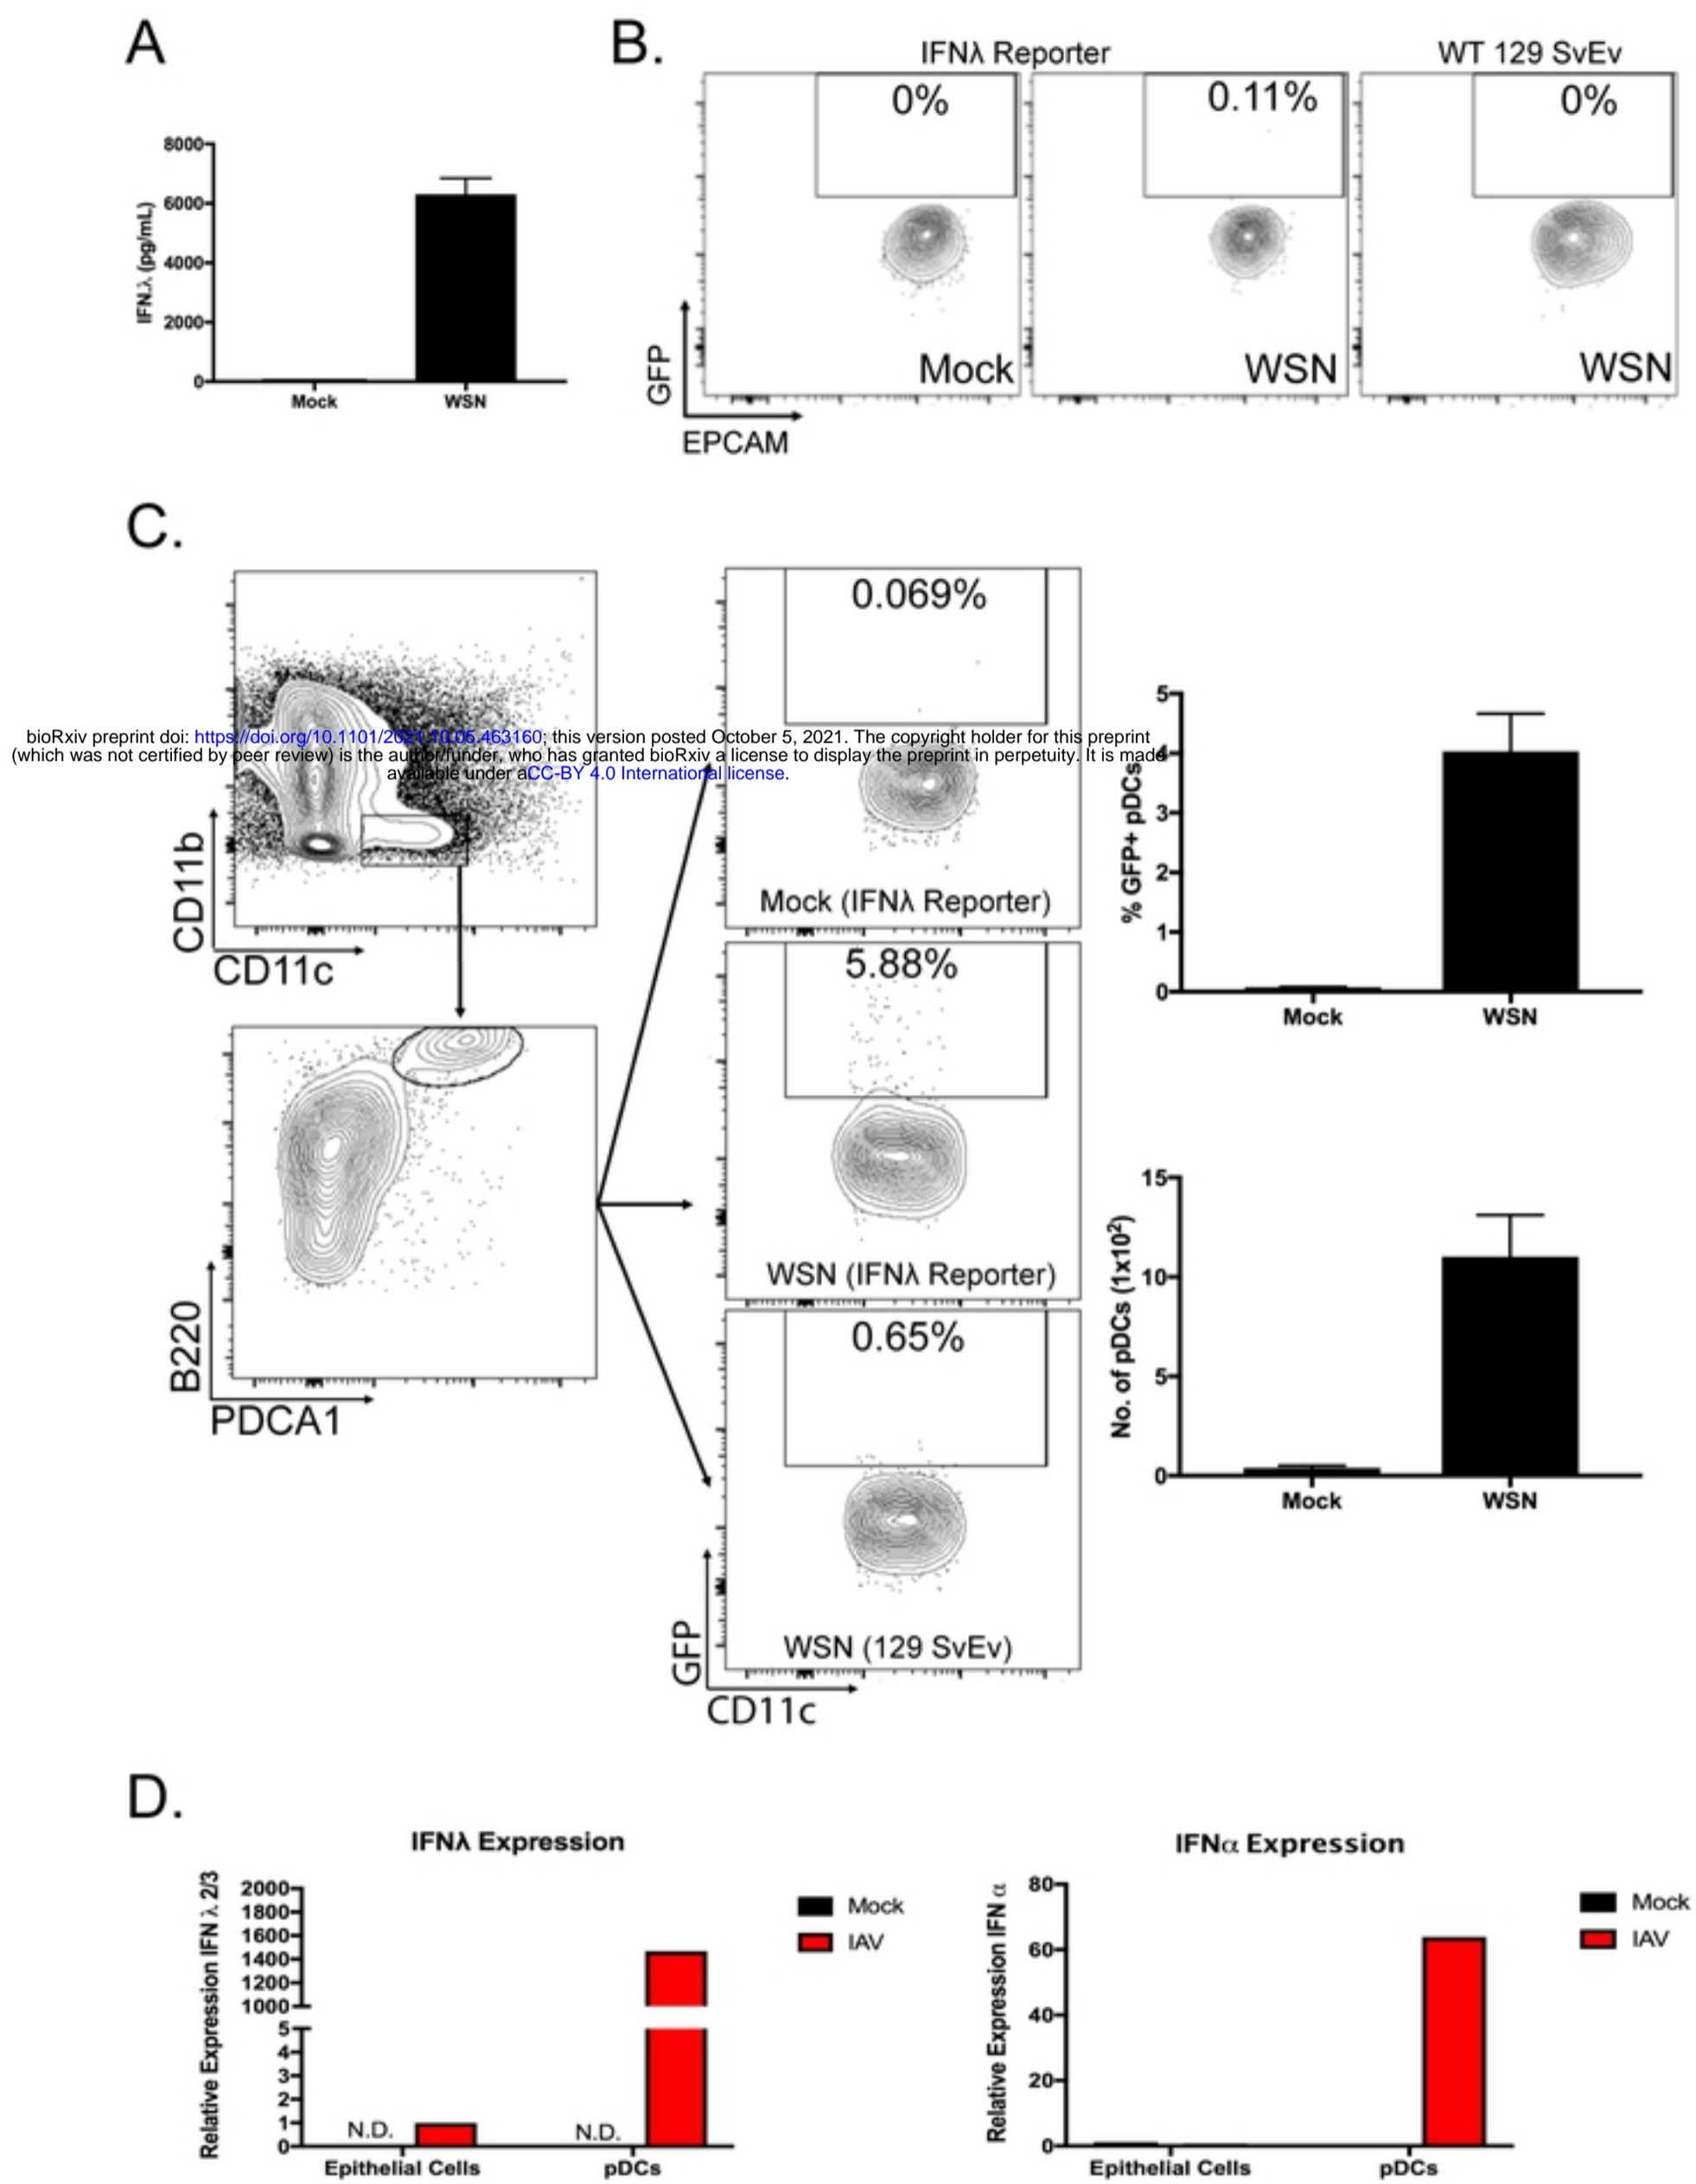

bioRxiv preprint doi: <https://doi.org/10.1101/2021.10.05.463160>; this version posted October 5, 2021. The copyright holder for this preprint (which was not certified by peer review) is the author/funder, who has granted bioRxiv a license to display the preprint in perpetuity. It is made available under aCC-BY 4.0 International license.

bioRxiv preprint doi: <https://doi.org/10.1101/2021.10.05.463160>; this version posted October 5, 2021. The copyright holder for this preprint (which was not certified by peer review) is the author/funder, who has granted bioRxiv a license to display the preprint in perpetuity. It is made available under aCC-BY 4.0 International license.

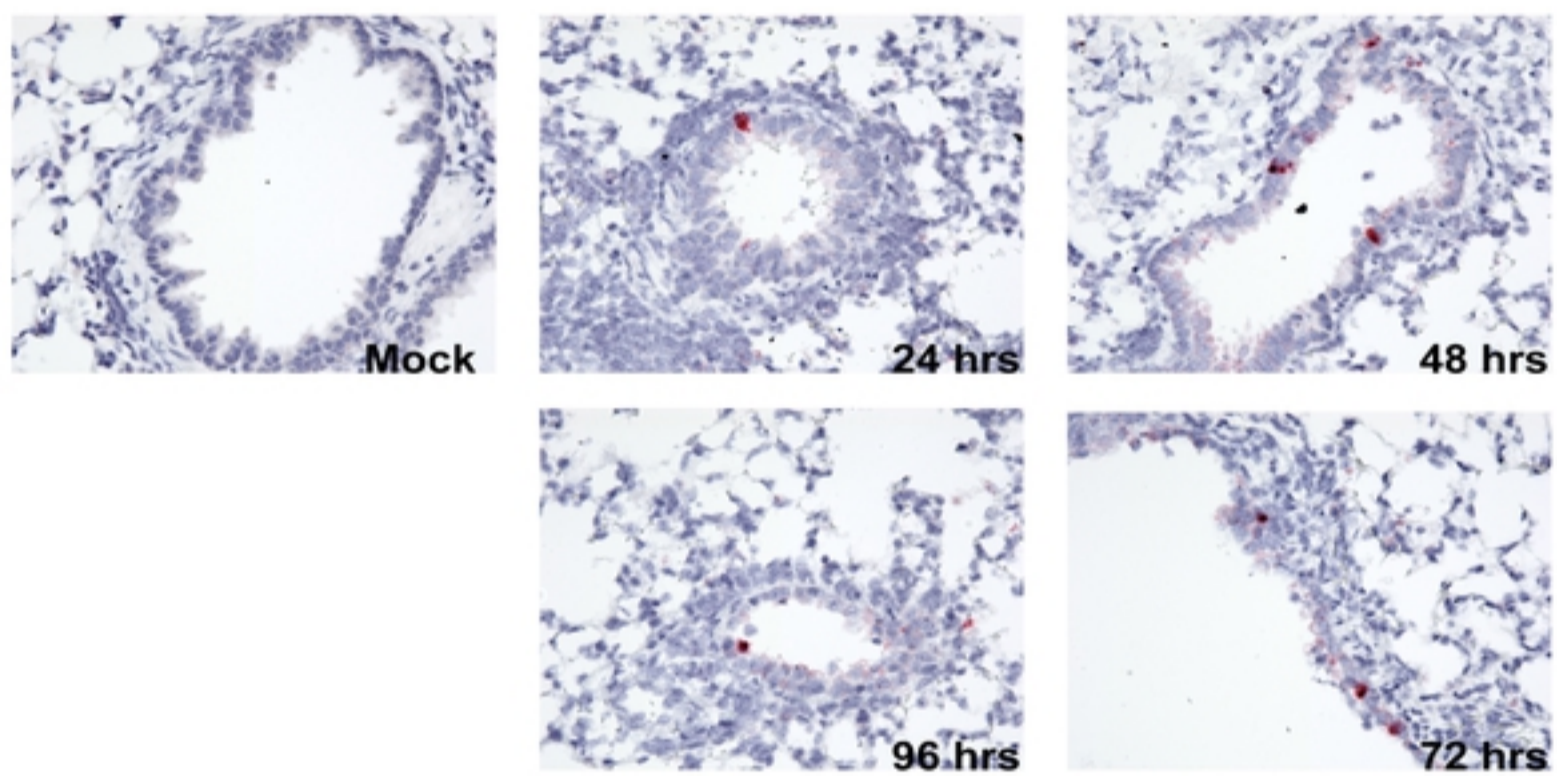

A.

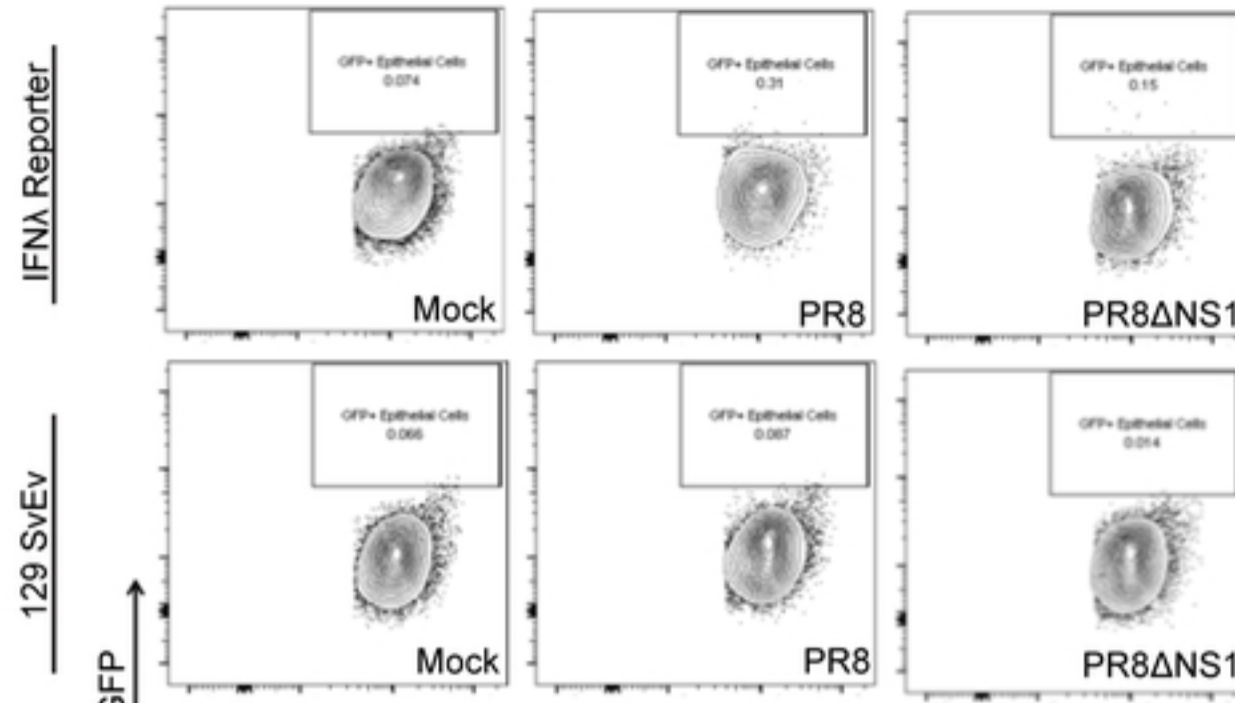

bioRxiv preprint doi: <https://doi.org/10.1101/2021.10.05.463160>; this version posted October 5, 2021. The copyright holder for this preprint (which was not certified by peer review) is the author/funder, who has granted bioRxiv a license to display the preprint in perpetuity. It is made available under aCC-BY 4.0 International license.

B.

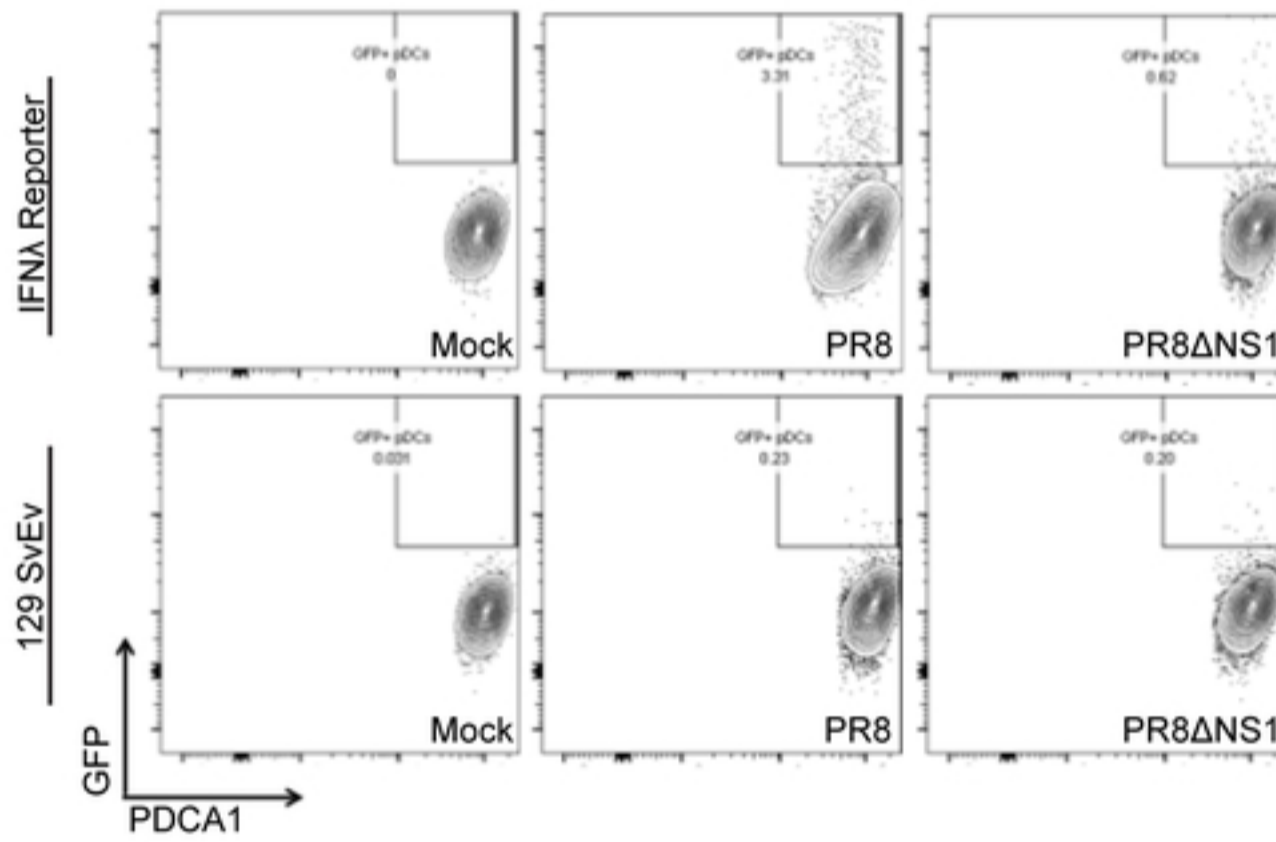

C.

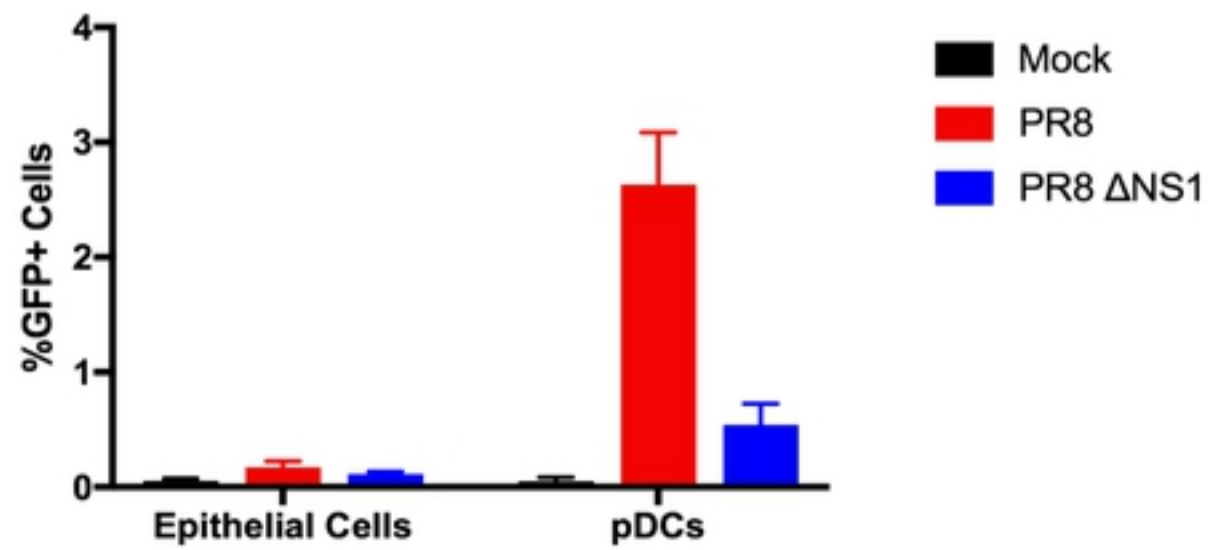

bioRxiv preprint doi: <https://doi.org/10.1101/2021.10.05.463160>; this version posted October 5, 2021. The copyright holder for this preprint (which was not certified by peer review) is the author/funder, who has granted bioRxiv a license to display the preprint in perpetuity. It is made available under aCC-BY 4.0 International license.

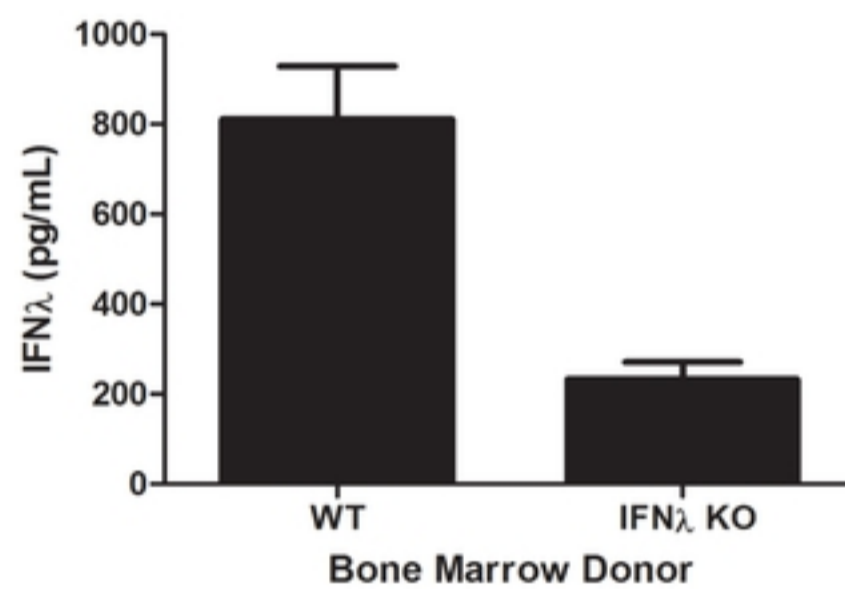

A.

bioRxiv preprint doi: <https://doi.org/10.1101/2021.10.05.463160>; this version posted October 5, 2021. The copyright holder for this preprint (which was not certified by peer review) is the author/funder, who has granted bioRxiv a license to display the preprint in perpetuity. It is made available under a [CC-BY 4.0 International license](https://creativecommons.org/licenses/by/4.0/).

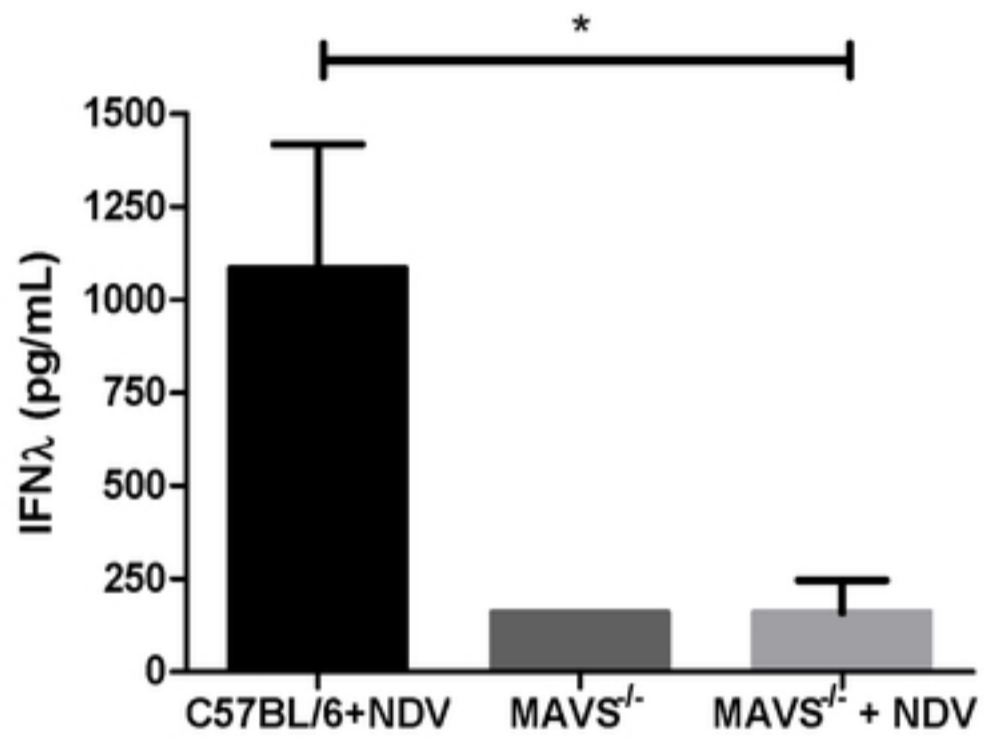

B.

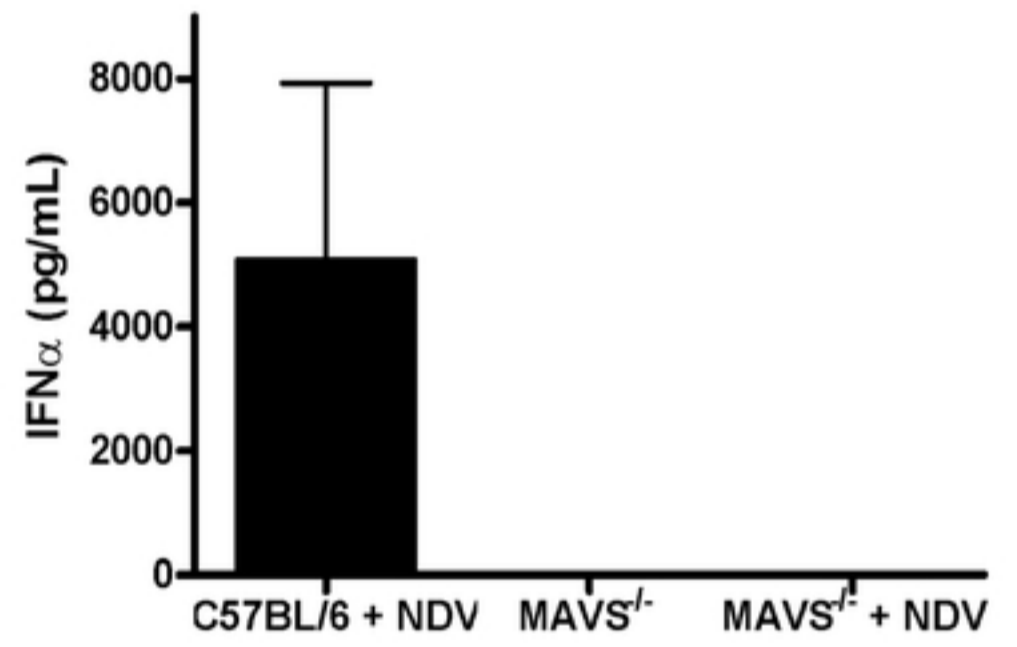



bioRxiv preprint doi: <https://doi.org/10.1101/2021.10.05.460160>; this version posted October 5, 2021. The copyright holder for this preprint (which was not certified by peer review) is the author/funder, who has granted bioRxiv a license to display the preprint in perpetuity. It is made available under aCC-BY 4.0 International license.

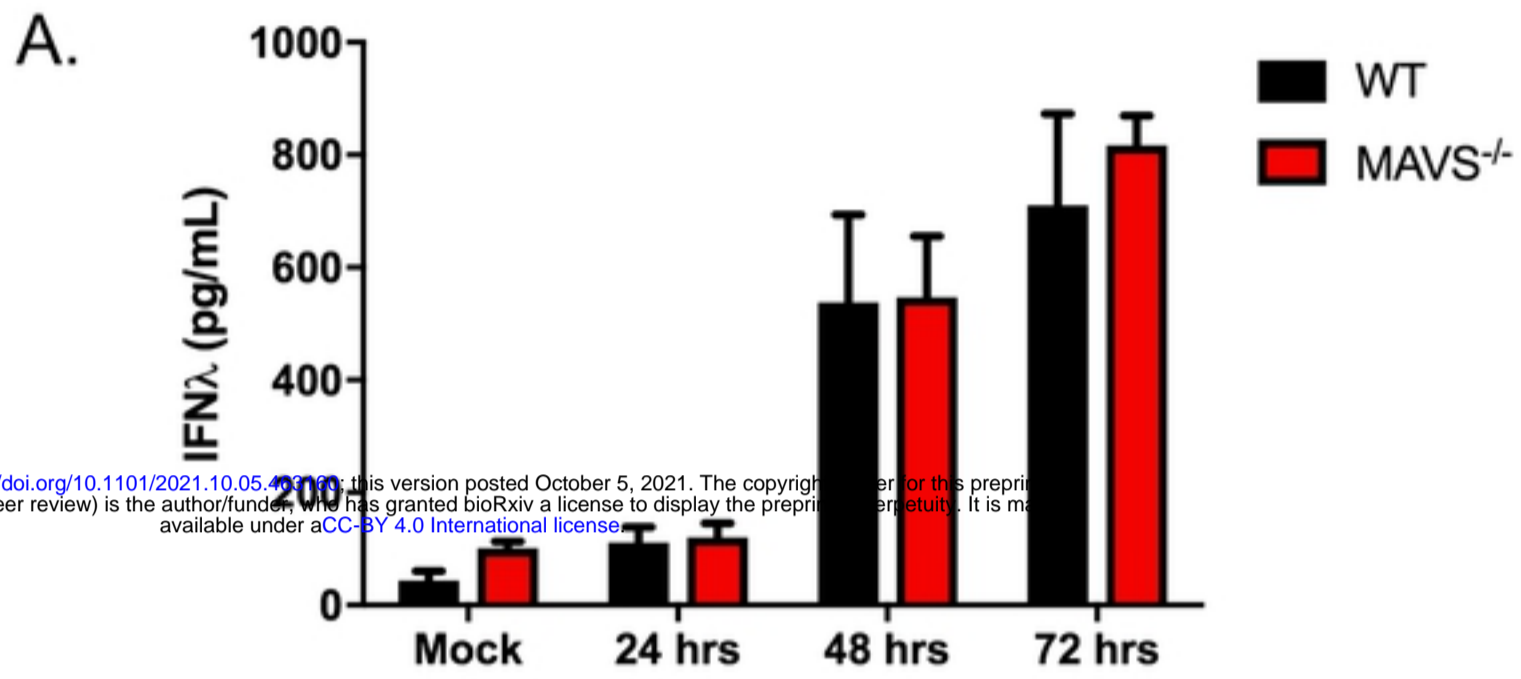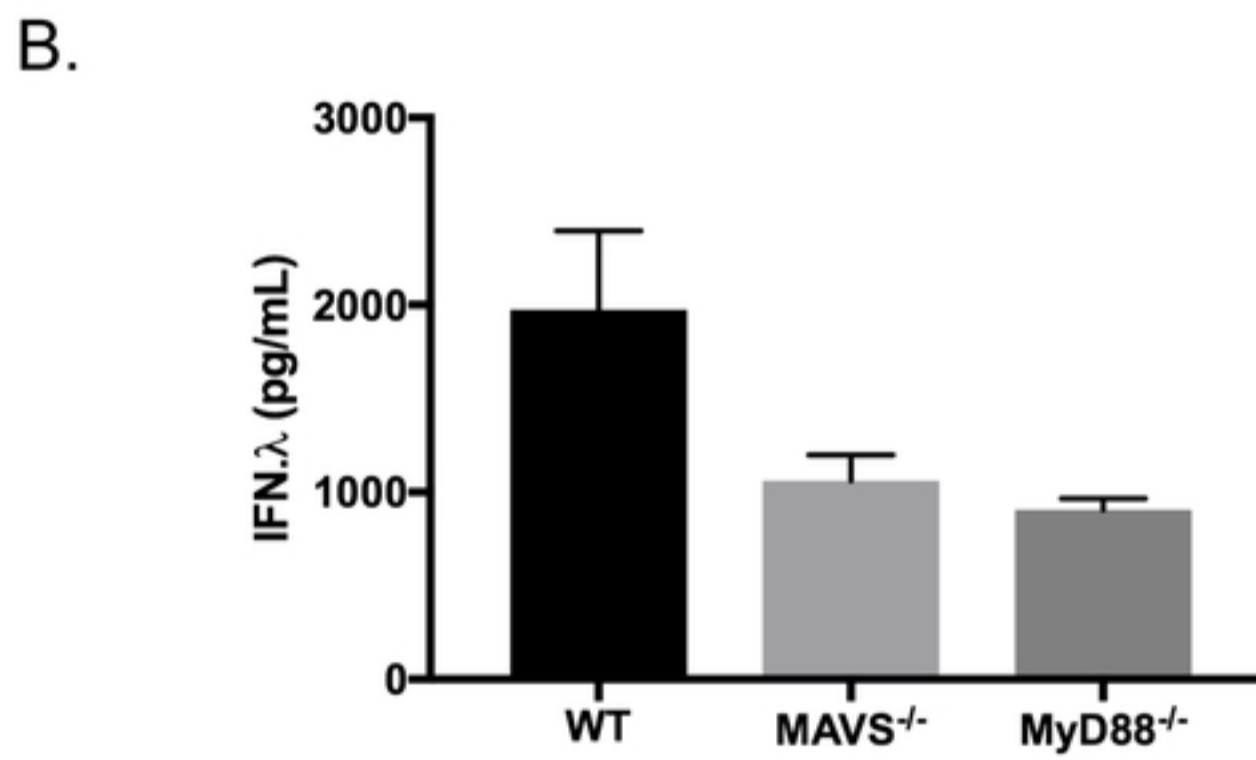



bioRxiv preprint doi: <https://doi.org/10.1101/2021.10.05.463160>; this version posted October 5, 2021. The copyright holder for this preprint (which was not certified by peer review) is the author/funder, who has granted bioRxiv a license to display the preprint in perpetuity. It is made available under a [CC-BY 4.0 International license](#).

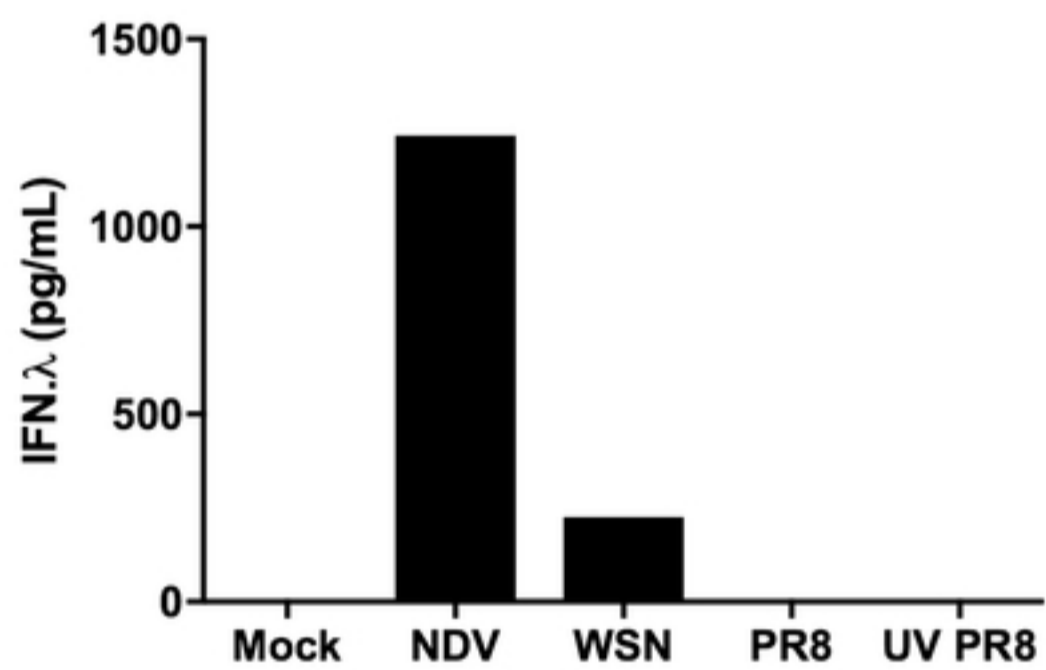

bioRxiv preprint doi: <https://doi.org/10.1101/2021.10.05.463160>; this version posted October 5, 2021. The copyright holder for this preprint (which was not certified by peer review) is the author/funder, who has granted bioRxiv a license to display the preprint in perpetuity. It is made available under aCC-BY 4.0 International license.

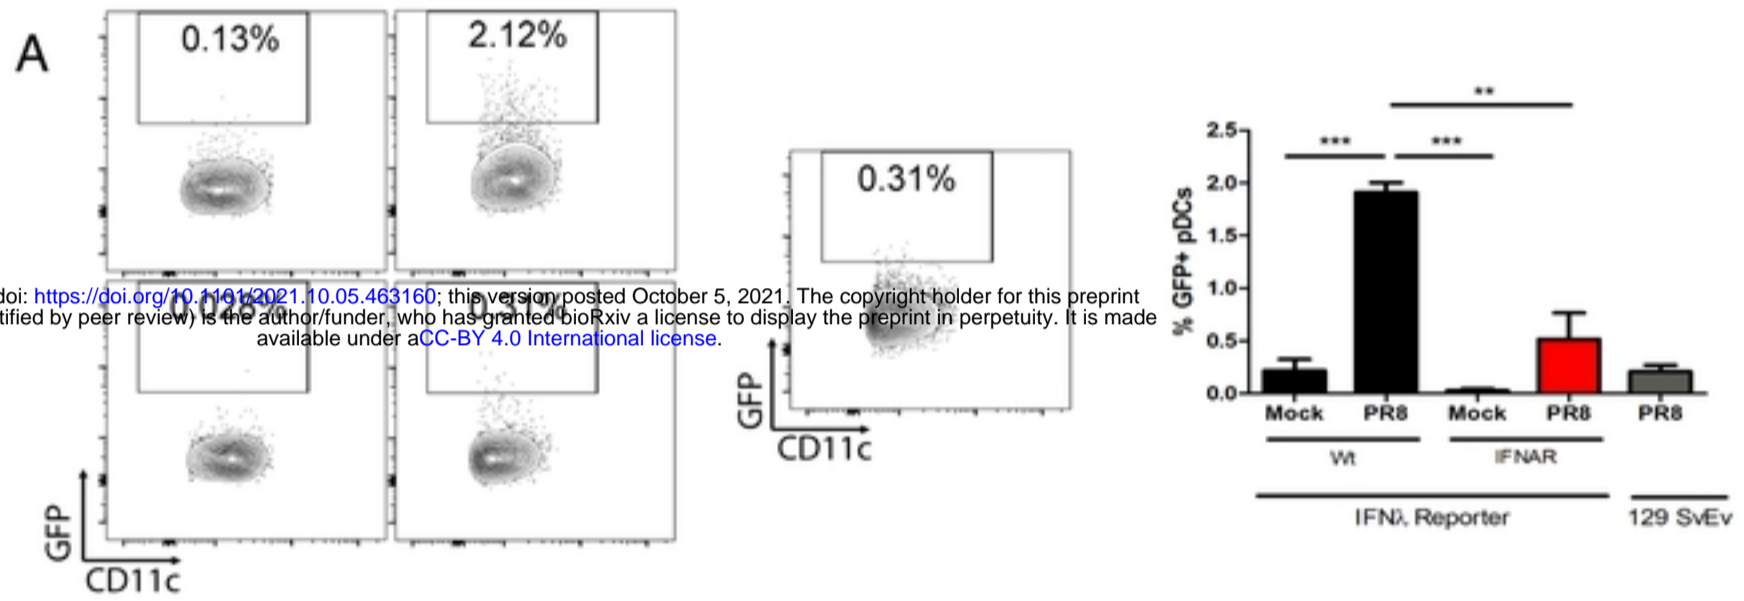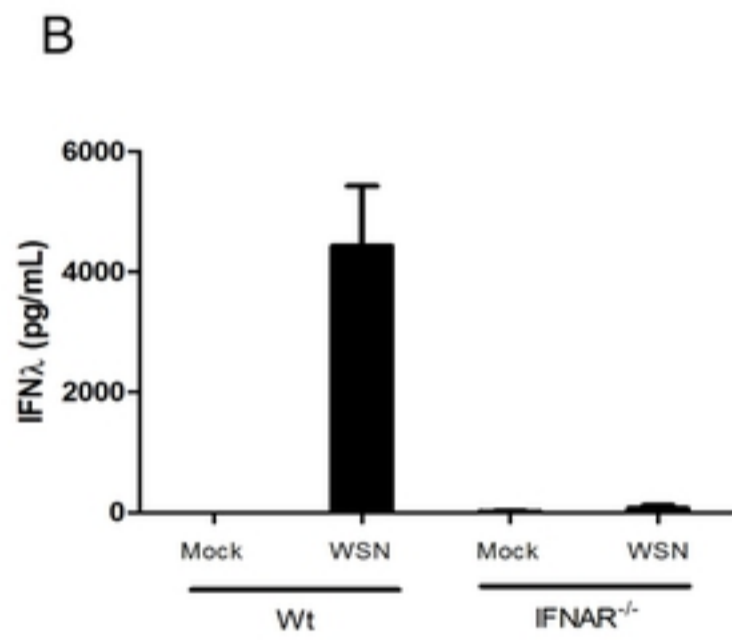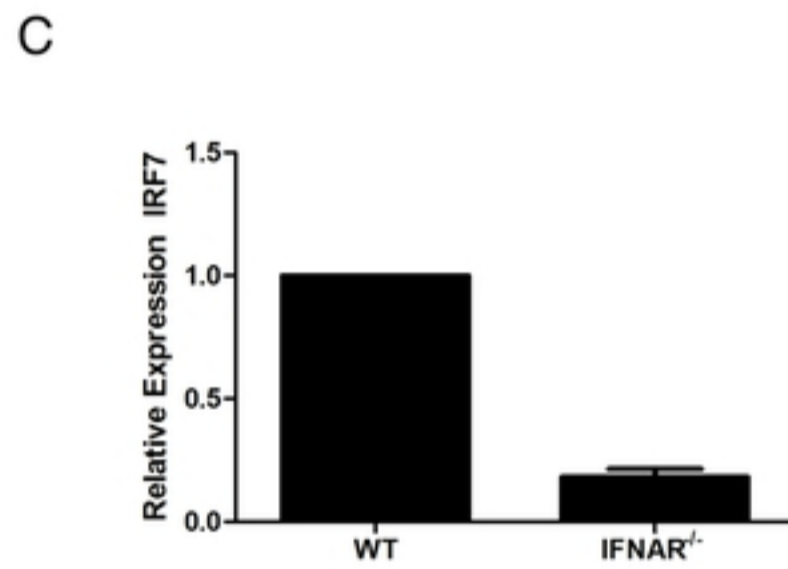

bioRxiv preprint doi: <https://doi.org/10.1101/2021.10.05.463160>; this version posted October 5, 2021. The copyright holder for this preprint (which was not certified by peer review) is the author/funder, who has granted bioRxiv a license to display the preprint in perpetuity. It is made available under a [CC-BY 4.0 International license](#).

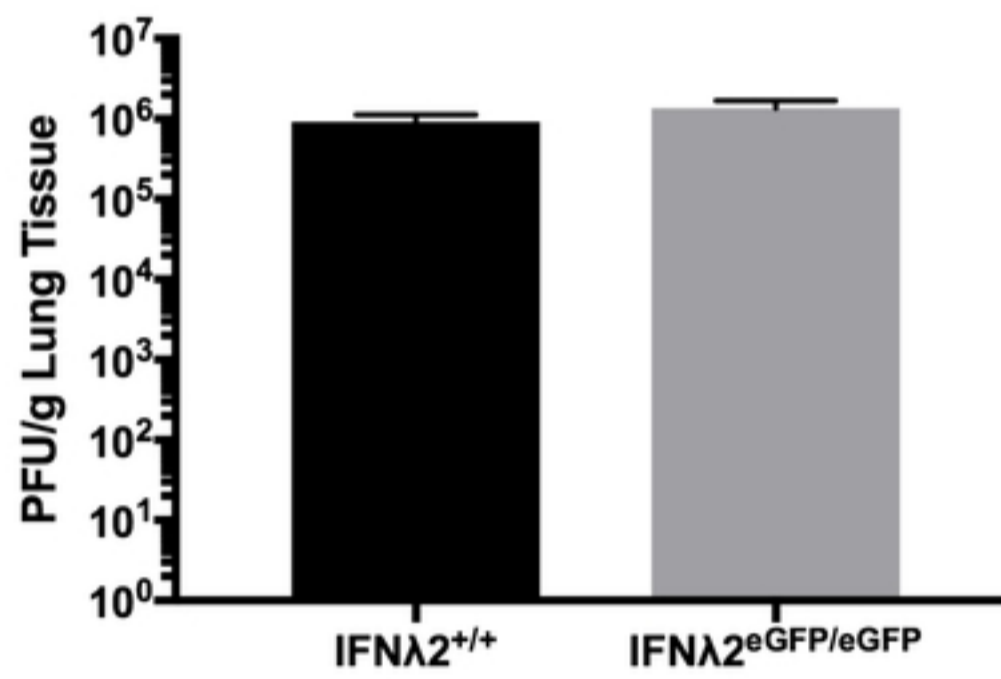

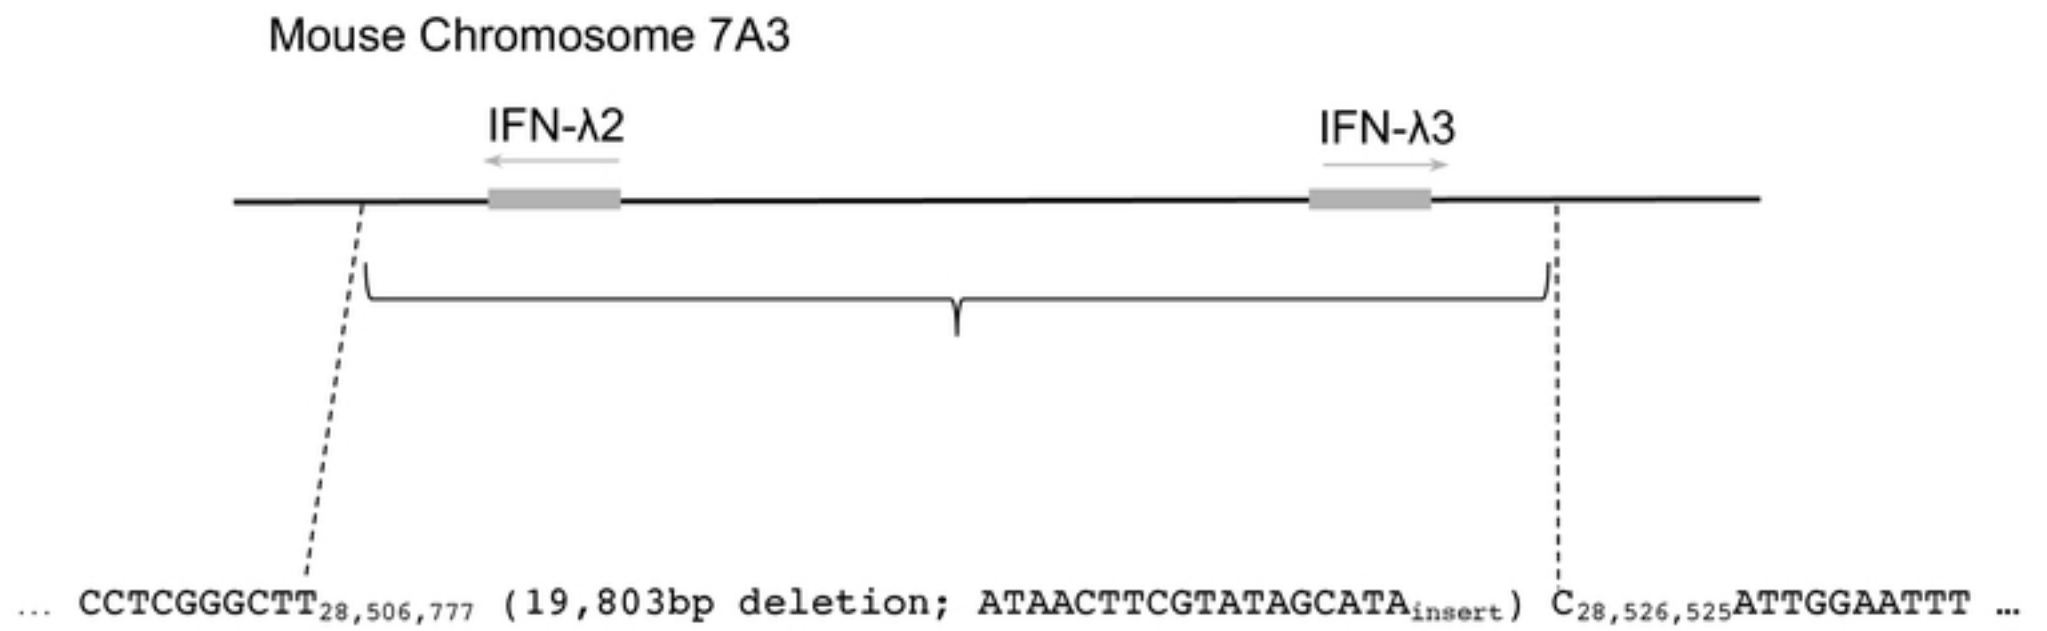

The region encompassing the IFN- $\lambda$ 2 and IFN- $\lambda$ 3 genes on murine chromosome 7, that was deleted by the Crispr/Cas9 Technology, is schematically shown.

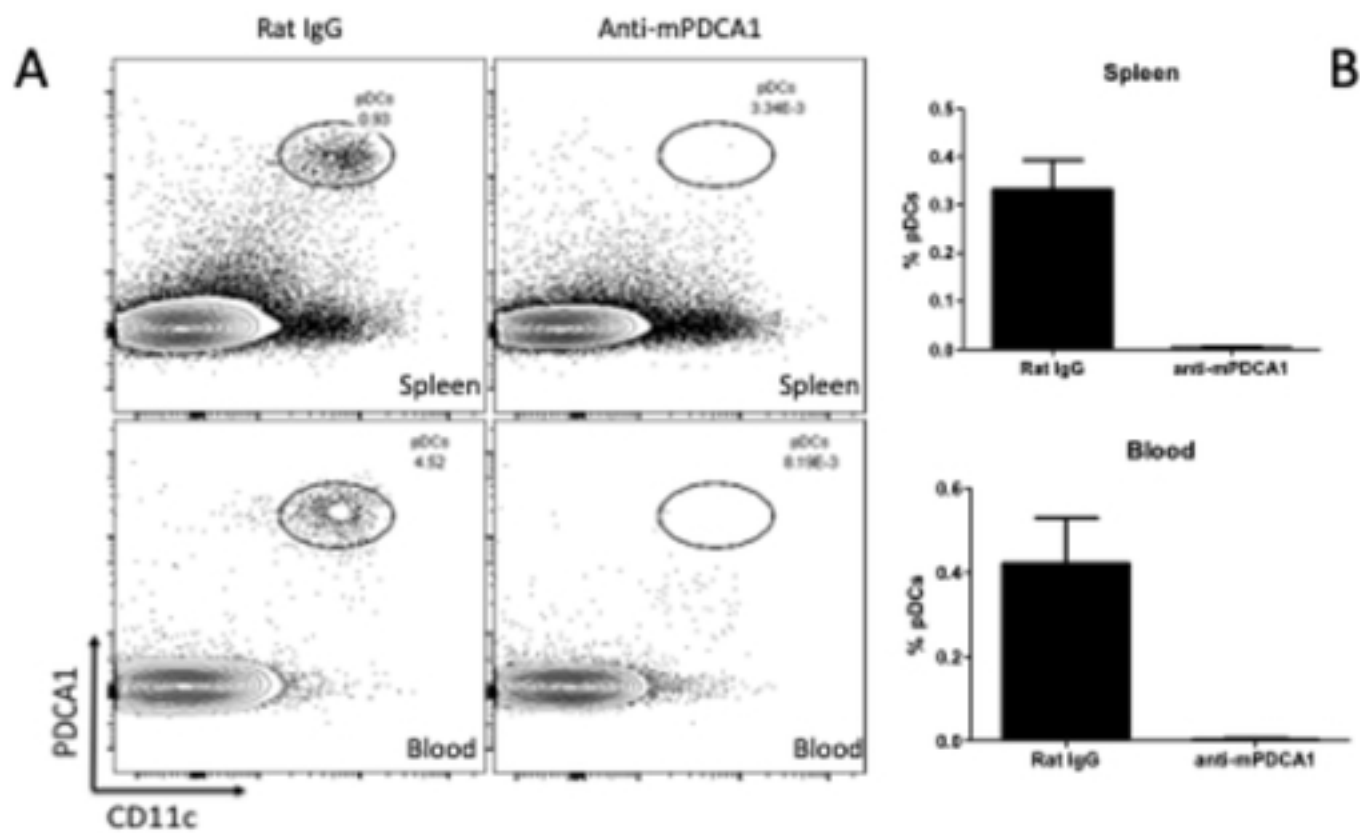

**B**

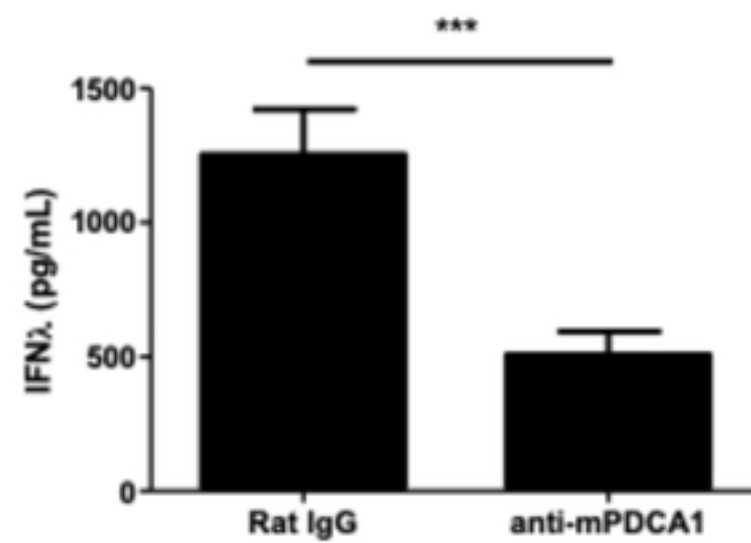

Figure

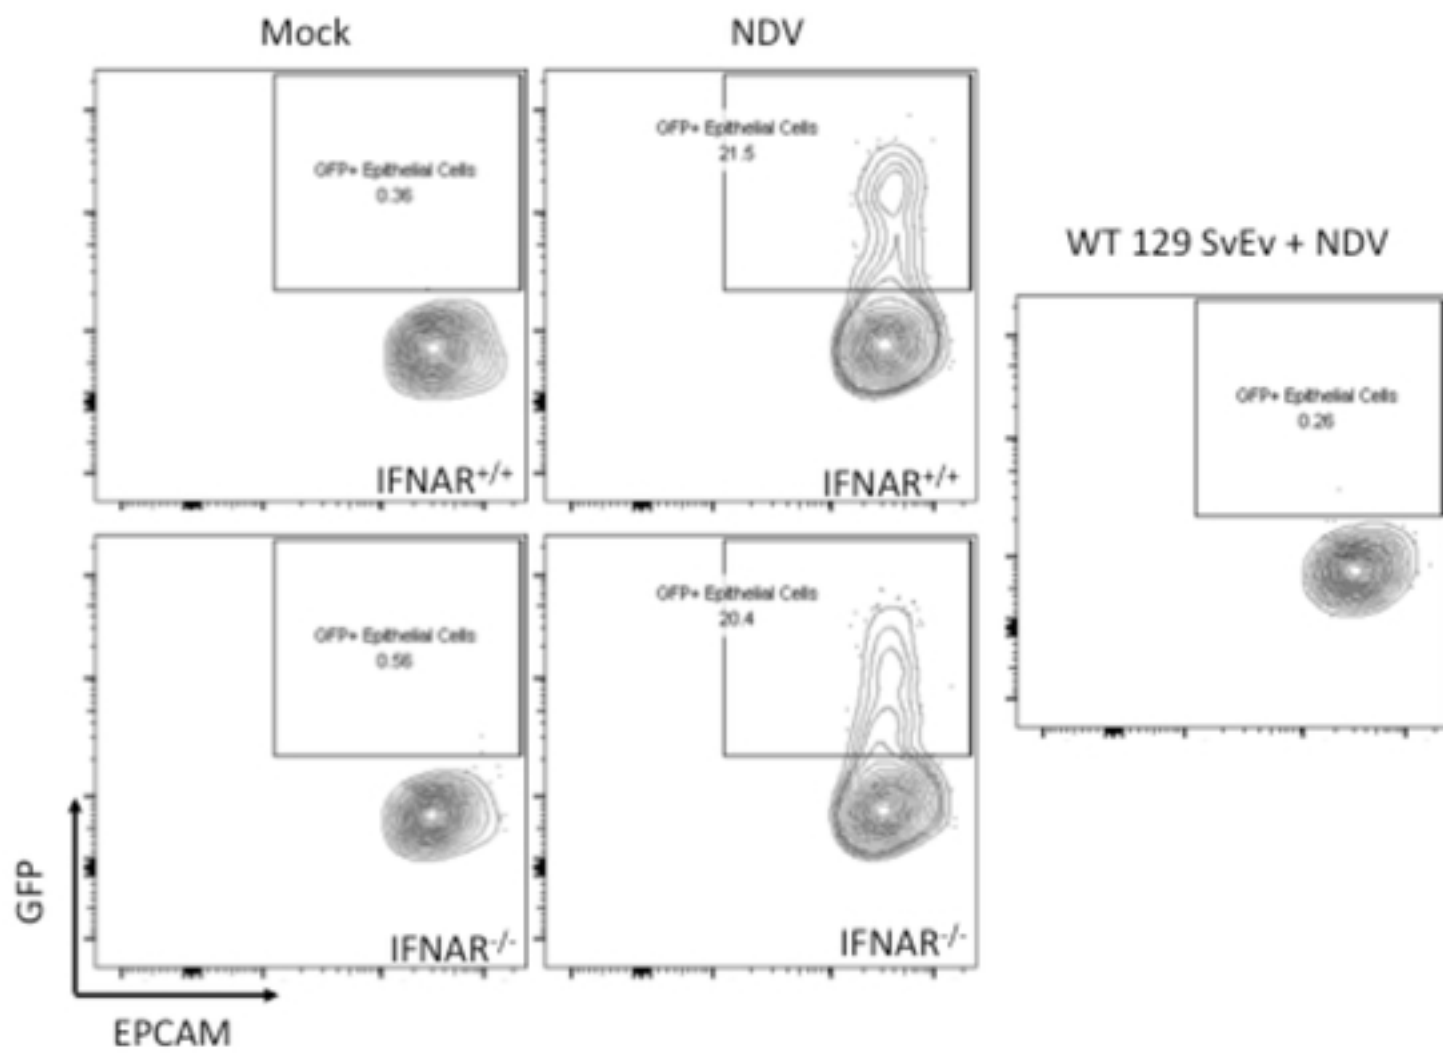

Figure
